# Supplementary material
Source: PubMed Central journal article supplement (PMC10250106)
Supplement: NIHMS1896905-supplement-Supplementary_materials.pdf [file NIHMS1896905-supplement-Supplementary_materials.pdf]

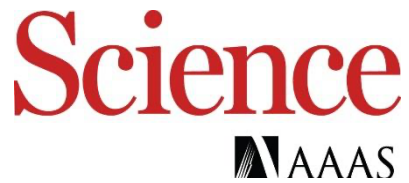

## Supplementary Materials for

Evolutionary constraint and innovation across hundreds of placental mammals

**Authors:** Matthew J. Christmas<sup>1†</sup>, Irene M. Kaplow<sup>2,3†</sup>, Diane P. Genereux<sup>4</sup>, Michael X. Dong<sup>1</sup>, Graham M. Hughes<sup>5</sup>, Xue Li<sup>4,6,7</sup>, Patrick F. Sullivan<sup>8,9</sup>, Allyson G. Hindle<sup>10</sup>, Gregory Andrews<sup>7</sup>, Joel C. Armstrong<sup>11</sup>, Matteo Bianchi<sup>1</sup>, Ana M. Breit<sup>12</sup>, Mark Diekhans<sup>11</sup>, Cornelia Fanter<sup>10</sup>, Nicole M. Foley<sup>13</sup>, Daniel B. Goodman, Linda Goodman<sup>14</sup>, Kathleen C. Keough<sup>14,15,16</sup>, Bogdan Kirilenko<sup>17,18,19</sup>, Amanda Kowalczyk<sup>2,3</sup>, Colleen Lawless<sup>5</sup>, Abigail L. Lind<sup>15,16</sup>, Jennifer R. S. Meadows<sup>1</sup>, Lucas R. Moreira<sup>4,7</sup>, Ruby W. Redlich<sup>20</sup>, Louise Ryan<sup>5</sup>, Ross Swofford<sup>4</sup>, Alejandro Valenzuela<sup>21</sup>, Franziska Wagner<sup>22</sup>, Ola Wallerman<sup>1</sup>, Ashley R. Brown<sup>2,3</sup>, Joana Damas<sup>23</sup>, Kaili Fan<sup>7</sup>, John Gatesy<sup>24</sup>, Jenna Grimshaw<sup>25</sup>, Jeremy Johnson<sup>4</sup>, Sergey V. Kozyrev<sup>1</sup>, Alyssa J. Lawler<sup>3,4,20</sup>, Voichita D. Marinescu<sup>1</sup>, Kathleen M. Morrill<sup>4,6,7</sup>, Austin Osmanski<sup>25</sup>, Nicole S. Paulat<sup>25</sup>, BaDoi N. Phan<sup>2,3,26</sup>, Steven K. Reilly<sup>27</sup>, Daniel E. Schäffer<sup>2</sup>, Cynthia Steiner<sup>28</sup>, Megan A. Supple<sup>29</sup>, Aryn P. Wilder<sup>28</sup>, Morgan E. Wirthlin<sup>2,3,30</sup>, James R. Xue<sup>4,31</sup>, Zoonomia Consortium<sup>§</sup>, Bruce W. Birren<sup>4</sup>, Steven Gazal<sup>32</sup>, Robert M. Hubble<sup>33</sup>, Klaus-Peter Koepfli<sup>34,35,36</sup>, Tomas Marques-Bonet<sup>37,38,39,40</sup>, Wynn K. Meyer<sup>41</sup>, Martin Nweeia<sup>42,43,44,45</sup>, Pardis C. Sabeti<sup>4,31,46</sup>, Beth Shapiro<sup>29,47</sup>, Arian F. A. Smit<sup>33</sup>, Mark Springer<sup>48</sup>, Emma Teeling<sup>5</sup>, Zhiping Weng<sup>7</sup>, Michael Hiller<sup>17,18,19</sup>, Danielle L. Levesque<sup>12</sup>, Harris A. Lewin<sup>23,49,50</sup>, William J. Murphy<sup>13</sup>, Arcadi Navarro<sup>37,39,51,52</sup>, Benedict Paten<sup>11</sup>, Katherine S. Pollard<sup>15,16,53</sup>, David A. Ray<sup>25</sup>, Irina Ruf<sup>54</sup>, Oliver A. Ryder<sup>28,55</sup>, Andreas R. Pfenning<sup>2,3</sup>, Kerstin Lindblad-Toh<sup>1,4†\*</sup>, Elinor K. Karlsson<sup>4,7,56†\*</sup>

Correspondence to: kersli@broadinstitute.org (KLT) and elinor.karlsson@umassmed.edu (EKK)

### This PDF file includes:

- Materials and Methods
- Supplementary Text
- Figs. S1 to S18
- Tables S1 to S15
- Captions for Data S1 to S3
- References 181-334

### Other Supplementary Materials for this manuscript include the following:

- Data S1 to S3
  - Data S1. Average phyloP scores for protein-coding genes.
  - Data S2. Input data for analysis of constraint in 100kb bins.
  - Data S3. Hibernation RERConverge results.

## Materials and Methods

### Alignment update

After inferring the initial 242-way alignment used in (11), we realized that the tarsier (*Carlito syrichta*) genome we had included was a mislabeled kangaroo rat. We removed the mislabeled genome from the alignment using the `halRemoveGenome` command in the HAL toolkit (181). Due to the progressive alignment process, the misplaced genome likely negatively influenced the reconstruction of the ancestors above it in the guide tree and thus the alignment from the rest of the primates (the clade it was basal to) to the other clades. To remedy this, we re-aligned the affected part of the alignment (the parts involved in inferring all ancestors above tarsier) to remove the influence of the mislabeled genome without requiring re-alignment of unaffected parts of the tree. Since subtrees not below tarsier were not affected (due to their alignments not including tarsier as a descendant or outgroup genome), they did not require re-inference. We constructed a re-inference alignment with guide tree:

```
((((((fullTreeAnc110:0.1523,Galeopterus_variegatus:0.12765)fullTreeAnc112:0.01,fullTreeAnc113:0.15442)fullTreeAnc114:0.04,fullTreeAnc69:0.04)fullTreeAnc115:0.0406,fullTreeAnc237:0.0212)fullTreeAnc238:0.0237,fullTreeAnc14:0.02)fullTreeAnc239;
```

where we obtained the *fullTreeAnc* ancestors used as leaves from the original HAL. We used platypus as an outgroup genome. We used the relationships and ancestral sequences from the re-inferred "supertree" alignment and merged them with the existing, original alignments between species in each subtree (using `halReplaceGenome` from the HAL toolkit). In the process, we removed the now-redundant ancestor above tarsier (*fullTreeAnc111*). The alignment improved after removal of the duplicate genome and re-inference: coverage of the human genome from non-primate species increased by an average of 2.2% of the human genome, which was an average 6% relative increase from the coverage in the original alignment.

### Identifying genes in Zoonomia genomes using halLiftover

For the *halLiftover*-based ortholog identification, we began with human protein-coding and exon sequence annotation from ENSEMBL (BioMart v99; Downloaded March 2020) (182). For each gene investigated, we chose the longest transcript. We used *halLiftover* in conjunction with Zoonomia Cactus alignment (4) to identify sequences orthologous to the protein-coding sequence of each exon across each of the 241 assemblies. These sequences were prone to frameshift mutations, internal stop codons, and likely premature truncations. Those issues were likely due to missing sequence or small errors in the sequence alignments and amplified by the large evolutionary distance. We therefore performed two variations of post-processing steps.

For transcripts marked "Pfenning," we first choose the ortholog of the annotations from the most closely related of human, goat, or mouse, a set of high-quality genomes and annotations that span a large segment of the mammalian evolutionary tree. We mapped the set of ENSEMBL exons for the reference sequence to the target species using *halLiftover* on the Zoonomia Cactus alignment (11, 181). We matched each lifted over exon sequence fragment to reference exons by translating it into an amino acid sequence and shifting start and end points to match exon boundaries. We then merged exon boundaries only if they did not create a frameshift mutation, did not create an internal stop codon, or did not increase the size of the exon by greater than or equal to three-fold.

For transcripts marked "Broad," we use the *halLiftover* outputs from mapping the human gene coordinates to each species. We smoothed the *halLiftover* output for each protein-coding gene/species/contig combination by making a single interval from the first and last coordinates for

each gene ortholog in the halLiftover output. We padded both ends with 500bp and then, for each species, extracted the genome sequence in that interval. We then applied Exonerate protein2genome (183) to translate the original human gene into protein sequences and then to predict exons and introns in each species by finding sequences matching the human sequences within the smoothed, padded halLiftover outputs while accounting for splice site sequences.

For both methods, we considered a transcript to be “valid” if the predicted protein sequence started with methionine, was contained on a single contig, and was within 90-110% of the length of the human reference protein. If a transcript was not “valid,” we repeated this process for the next-longest transcript for the gene; if there were no additional transcripts in a species, we did not report an annotation for that gene, species combination. If “valid” transcripts were found for multiple contigs, we reported only the first valid transcript found. We reported transcripts along with their identity and similarity scores (from Exonerate) on both the exon and transcript level. We also reported insertions and deletions (from Exonerate) at the exon level. For our final annotations, we excluded all annotations of genes that do not have human orthologs.

Given that genes are sporadically missing from each genome due to genome quality issues, cataloging “essential” genes found in all placental mammals is not feasible. We annotated just 116 genes in all 240 Zoonomia species. When we consider only the highest-quality assembly in each order, this increases to 2,718 genes, still far fewer than the 9,226 included in the BUSCO version odb10 gene set of mammalian single-copy orthologs (184).

We have released our data on the following website: [http://genome.ucsc.edu/cgi-bin/hgGateway?genome=Homo\\_sapiens&hubUrl=http://cgl.gi.ucsc.edu/data/cactus/241-mammalian-2020v2-hub/hub.txt](http://genome.ucsc.edu/cgi-bin/hgGateway?genome=Homo_sapiens&hubUrl=http://cgl.gi.ucsc.edu/data/cactus/241-mammalian-2020v2-hub/hub.txt). We have labeled each entry with the corresponding human gene name, the corresponding human transcript name, the protein ENSEMBL ids, the gene name in the species if it was available, and the method used to generate the annotation.

### Identification of *CMAH* gene loss

Determining gene loss from genome assemblies can be confounded by mis-assemblies and by assembly gaps. To avoid these confounding factors, we combined two approaches, one using short reads and one using genome assemblies, to determine whether the *CMAH* gene had been lost in mammalian genomes. We selected a reference genome with an intact, well-annotated *CMAH* gene for each of the species. For the short-read approach, we obtained publicly available Illumina paired-end reads obtained from the NCBI Short Read Archive (185) for each species and aligned them to their assigned reference genomes with bowtie2 using the very-sensitive-local parameter (186). We determined read coverage of the *CMAH* coding sequence using bedtools (187). For the genome assembly analysis approach, we aligned the protein sequence of the *CMAH* gene from the assigned reference genome to each genome assembly using exonerate (183). We evaluated results from the exonerate analysis by comparing them to the Cactus multiple genome alignment. We considered putative *CMAH* gene loss events to be cases where both the short-read alignment coverage and the exonerate alignment indicated gene loss and where both approaches indicated loss of the same part of the gene. Custom python scripts used for processing outputs from bedtools and exonerate are available on the github repository.

### Mammalian neutral model for constraint scoring

We used the alignment of 241 mammals (4) in HAL-format (HAL Tools v2.1) (181) as the input to generate three different neutral models. The first was a general model, used for autosomes, and the other two were for each of the sex chromosomes (chrX and chrY). We used

the resulting nucleotide substitution rate matrices to generate conservation scores. For this process, we first identified the ancestral repeats by running RepeatMasker Open-4.0. 2013-2015 (188) on the ancestral sequence of the mammal alignment. We used sequence from the second most ancestral branch (fullTreeAnc238) instead of the most ancestral sequence (fullTreeAnc239), as interspersed repeats on fullTreeAnc238 had better reconstruction of the eutherian ancestral form than in fullTreeAnc239 (personal communication A. Smit) (188). We converted repeat coordinates to fullTreeAnc239 using halLiftover (181). Then, we filtered ancestral sequence repeat sets to exclude i) non-mammalian repeats shared with birds and reptiles; ii) repeat sequences annotated as structural RNA copies, satellites, tandem repeats, and low complexity annotations; and iii) regions where synteny was not present across the four major branches of the mammalian tree: Xenarthra, Afrotheria, Laurasiatheria, and Euarchontoglires (reconstruction using halLiftover).

The input for the neutral evolution model calculation was a random set of ancestral repeat positions (100kb total) selected from the outputs of halLiftover. The use of ancestral repeats as representative of neutrally evolving sequences is supported by evidence for a lack of purifying selection acting on ancestral repeats (38). We extracted an ancestor-referenced multiple alignment formatted file (MAF) alignment (hal2maf) and used PhyloFit from Phast v1.5, with default parameters (--subst-mod REV --EM) and with the corrected tree, to estimate branch lengths while fixing the tree topology (181, 189). We processed the resultant alignment (mafDuplicateFilter) to filter sequences that aligned multiple times to the same region (190). This step avoided potential biases due to species over-alignment. For sex chromosome-specific models, we converted ancestral repeat coordinates from the HAL alignment to human hg38 coordinates (halLiftover) (181). We selected random sets of repeat positions from either chromosome X or Y of the human outputs of halLiftover (i.e., 100Kb as above) to calculate the neutral models specific to each sex chromosome. We constructed those models separately from the general model because sex chromosomes evolve at different rates to autosomes (191). We later used all these models to compute phyloP scores.

We used the same method as above to estimate primate-neutral models, with the difference being that ancestral branch reconstruction was based on the 43 primates from the alignment. For these, we used human as the reference. We evaluated synteny with six of the reconstructed branches in the primates tree (fullTreeAnc112, fullTreeAnc107, fullTreeAnc103, fullTreeAnc88, fullTreeAnc78, fullTreeAnc70). We used these primate-neutral models to compute primate-specific PhastCons scores.

#### Alignment pre-processing, and alignment depth, nucleotide distribution, and branch length calculations

We converted the HAL alignment to a species-referenced MAF-format alignment using hal2maf (181), then filtered out species duplicates in the alignment using mafDuplicateFilter (<https://github.com/dentearl/mafTools>) in order to avoid scoring biases due to over-alignment (190). We allowed one sequence per species (i.e. the best match) in each alignment block to remain, which we chose by comparing the sequence to the consensus for the block (190). We repeated this for multiple reference species, ultimately creating human, chimpanzee, house mouse, dog, and little brown bat reference-based alignments.

For the primate-specific data, we filtered out non-primate species from the alignment using the mafSpeciesSubset command from mafTools (190). We collected the alignment depth and list of species aligned across the alignment using the Bio.Align package from BioPython



([https://biopython.org/wiki/Multiple\\_Alignment\\_Format](https://biopython.org/wiki/Multiple_Alignment_Format)) (192). We calculated total branch lengths for each of the alignment blocks in the MAF alignment files using the `tree_doctor` command with the branch length (`--branchlen`) option from the PHAST software package (193). PhyloP constraint score calculation: We used phyloP (part of the PHAST v1.5 package: <https://github.com/CshlSiepelLab/phast>) to calculate per-base constraint and acceleration p-values (194). We presented scores as  $-\log_{10}$  p-values under a null hypothesis of neutral evolution, where computation involved performing a likelihood ratio test at each alignment column (`--method LRT`) with constraint and acceleration scores outputted (`--mode CONACC`, negative values indicate acceleration). We calculated phyloP scores on the human-referenced, 241-way, MAF-formatted, duplicate-filtered alignment. Scores ranged from -20.0 to 8.903 for autosomes, -20.0 to 7.765 for chromosome X, and -20.0 to 9.280 for chromosome Y; the different ranges of scores between the autosomes, chromosome X, and chromosome Y are likely due to the differences in the models used for each. Scores from the dog and little brown bat-referenced 241-way MAF-formatted alignments ranged from only -20 to 8.903, as their assemblies did not include chromosome Y. Scores from the human-referenced, primates-only alignment (43-way) ranged from -20 to 1.264. Scores calculated on the primate subgroup had lower ranges than mammals, as the total branch lengths of clade-specific trees were relatively low compared to the entire mammalian tree. All associated scripts for calculating phyloP scores are available on Github (<https://github.com/michaeldong1/ZOONOMIA>).

We used phyloP because it allows us to use all our genomes to quantify the constraint of individual nucleotides of interest. Thus, our phyloP scores can be used for deciphering which of multiple near-by nucleotides is likely to be functional, such as identifying which of multiple genetic variants associated with a disease in linkage disequilibrium is likely to be causal. However, a limitation of phyloP is that it does not compute confidence intervals around estimates of constraint. Computing confidence intervals would require re-computing phyloP scores with hundreds or more different subsets of filtered ancestral repeats, which is computationally intractable.

PhastCons constraint score calculation: We also used PhastCons, another part of the PHAST package, which uses a phylogenetic hidden Markov model (phylo-HMM) to identify evolutionarily conserved elements (25, 195). In contrast to phyloP single-base constraint, PhastCons metrics incorporate the columns of flanking bases. We calculated two outputs: a per-base constraint score and a set of conserved elements coordinates (`--viterbi` option). We set the model parameters to match those used to generate the PhastCons output for the UCSC 100 Species Vertebrate Multiz Alignment & Conservation (`expected-length=45`, `target-coverage=0.3`, `rho= 0.31`, <http://genome.ucsc.edu/cgi-bin/hgTrackUi?db=hg19&g=cons100way>)(84).

#### Constraint score thresholds:

We computed a mammalian phyloP threshold by converting the p-values corresponding to the phyloP scores into q-values using a false discovery rate (FDR) correction (196) (R function `qvalue`). We classified outputs as constrained or accelerated based on the sign of the score; we considered any column with a resulting q-value  $\leq 0.05$  to be significantly evolutionarily constrained or accelerated (5% FDR, 240 mammal phyloP constraint score  $\geq 2.27$ , 3.528% of the human genome). We took a different approach for primate constraint given the fewer species ( $n=43$ ) and shorter branch lengths, as a phyloP score across primate species would be underpowered to discriminate the highly constrained bases from the background (12). We identified the PhastCons threshold that yielded a similar fraction of the genome under constraint

as for all mammals (i.e., PhastCons base score  $\geq 0.961$ , 3.54% of the human genome). The locations of significantly constrained bases in mammals and primates overlap, which is not surprising because the 43 primates we used are a subset of the 241 mammalian assemblies. We evaluated the mammalian phyloP threshold, the use of different scores to measure constraint in mammals and primates, and the base pair resolution of mammalian phyloP scores by comparing our results to expectations of amino acid and transcription factor motif conservation (**Figs. 2 and 3**) and by using heritability analyses of human diseases and complex traits (24).

Lower bound estimates of genome-wide constraint: We estimated the lower bound for the fraction of sites under purifying selection across the human, chimpanzee, dog, house mouse, and little brown bat genomes ( $\pi$ ) by comparing the empirical cumulative distribution functions (ECDF) of phyloP scores across each genome to the ECDF of ancestral repeats, following the same method detailed in (12) where:

$$\pi = 1 - \min_s F(s)/G(s).$$

Here,  $F$  is the ECDF for all sites across the genome (a function of scores  $s$ ), and  $G$  is the ECDF for ancestral repeats (i.e., sites not under any evolutionary pressure). We extracted coordinates of ancestral repeats from the UCSC repeatmasker track and filtered these to retain a set of ancestral repeats present in the four clades of the mammalian tree (Xenarthra, Afrotheria, Laurasiatheria, and Euarchontoglires) (81, 188). To account for the lack of certainty in the neutrality of ancestral repeats we generated 500 bootstrapped samples of ancestral repeats for each genome using the ‘equate’ package in R v.4.0.4. We calculated the ECDFs of phyloP values for all positions across each genome as well as for each set of bootstrapped ancestral repeats (500 sets per genome) using the `ecdf` function in R v.4.0.4 (197). We excluded phyloP values below -1.5 so that the extreme left tail of the ECDFs did not heavily influence estimates of constraint. We took the median values of  $\pi$  as our lower bound estimates of constraint due to skewed distributions and generated 95% confidence intervals around our estimates using the ‘`wilcox.test`’ function in R stats package, setting ‘`conf.int = TRUE`’. Values of  $\pi$  represent the proportion of bases under constraint in our genome-wide phyloP score sets and therefore do not include any unaligned positions. To achieve a value for the percentage of the whole genome that is under constraint, we first calculated the number of bases under constraint by multiplying the total number of positions with phyloP scores by  $\pi$ . The number of bases under constraint divided by the genome size is then the lower bound estimate for the proportion of the genome under constraint. Median values for lower bound estimates of the number of bases under constraint and their 95% confidence intervals are as follows: human 331.69 Mbp (331.61, 332.81), chimpanzee 358.77 Mbp (358.34, 360.73), mouse 238.54 Mbp (237.91, 239.54), dog 244.81 Mbp (244.18, 245.48), and bat 367.01 Mbp (367.00, 367.02).

These estimates may be influenced by any differences in base composition and substitution patterns between ancestral repeats and the rest of the genome (12). However, we note that for humans, the overall base composition of ancestral repeats is very similar to the genome-wide base composition (40.1% GC versus 41.0% GC respectively) and the distribution of ancestral repeats along each individual chromosome does not differ from a random distribution (tested using the `regionR` package in R, where we assessed whether the locations of ancestral repeats significantly overlaps the locations of a randomly distributed set of sequences with the same size distribution using a permutation test; the number of overlaps was significantly greater than expected by chance,  $p = 0.01$ ).

For the human genome, our lower-bound estimate of genome-wide constraint of  $\sim 10.7\%$  is about three times the number of bases identified as significantly under constraint at an FDR of

<0.05 (see above). The comparison of phyloP CDFs for the whole genome and for ancestral repeats provides a measure of the amount of the genome demonstrating higher conservation than observed for neutrally evolving sequences and therefore likely captures a lot of clade-specific (i.e., primates) constraint. Our stringent use of FDR=0.05 means that, whilst we are highly confident that positions below this threshold are under constraint, many constrained positions (particularly clade-specific ones) will not be captured, as our power to identify constrained positions is limited by the tree breadth and depth.

Previous attempts to estimate the proportion of the human genome under constraint have placed it at between 3 and 12% (13, 40, 198). For example, a more recent estimate of 8.2% (7.1-9.2%) (198) was computed using an empirical null based on a geometric distribution fit using distances between indels in pairwise alignments within ancestral repeats, and it would miss constrained nucleotides in short regions between indels. Other lower estimates used only 29 mammals (13) or 34 mammals but only 1% of the genome (12). All these previous methods used reference-based alignments that cannot handle some of the structural rearrangements that Cactus can align, such as inversions (199). Thus, our estimate of 10.7% is higher than previous estimates for several possible reasons, including the method used for quantifying constraint, the number of species considered, and the use of a Cactus alignment.

It has been argued that the amount of constraint cannot exceed 15% based on considerations of mutational load (200), although this approach is disputed (201). Our estimate is below this theoretical limit.

#### Differences between species in the proportion of genome under constraint

We found substantial differences between the proportions of constrained sequence in different species, with little brown bat having the highest proportion. To evaluate whether this may be a result of the variation in the number of closely related species in the alignment for these species rather than a true reflection of differences in constraint, we calculated the total branch length for the set of each species and each species's nine most closely related species. The correlations between these branch lengths and both the percentage ( $R=-0.06$ ;  $p=0.9$ ;  $n=5$ ) and the amount of constrained sequence ( $R=-0.47$ ;  $p=0.62$ ;  $n=5$ ) were not significant.

#### Constraint in protein-coding sequence

We obtained protein-coding annotations from GENCODE v.36 (202). We selected all protein-coding transcripts and checked for consistency in the cDNA, CDS, and peptide lengths (the number of amino acids in the peptide; the protein-coding length had to be 3x the peptide length, and the start codon had to be methionine.). Since most genes have many transcripts, we created a transcript hierarchy to pick one transcript per gene in this order (pickOne): MANE transcript (203), gnomAD canonical transcript (64), BUSCO transcript (204), protein-coding transcript, lncRNA transcript, pseudogene transcript, and other transcript. For each protein-coding transcript, we identified its structural parts: proximal promoter (500bp upstream of the TSS), TSS, 5'UTR exons, start codon, coding exons, canonical intronic splice sites, introns, stop codon, and 3'UTR exons. Some protein-coding genes do not have two UTRs, and some are intronless. We extracted phyloP scores for all positions in protein-coding genes including 5' and 3' UTRs (N=34,284,184 bp) to compare constraint between different positions within coding sequences. We tested the top 5% most accelerated and most conserved genes, measured by mean phyloP score, against a non-redundant representative set of Gene Ontology biological processes using WebGestalt (46, 205) and identified the top 10 overrepresented gene sets. We ran

WebGestalt from the web interface at <http://www.webgestalt.org/> and used the default parameters (minimum number of IDs in the category: 5; maximum number of IDs in the category: 2000; FDR Method: BH) and a reference gene set of all mapped entrezgene IDs.

We defined degeneracy at each protein-coding position using International Union of Pure and Applied Chemistry (IUPAC) codes and used R v.4.1.1 to summarize mean and standard deviation phyloP scores for positions within codons, degenerate and non-degenerate positions, methionines that act as and do not act as start codons, and cysteines that form and do not form intra-peptide disulfide bridges. We obtained locations of intra-peptide disulfide bridges from the UCSC Genome Browser (83): [https://genome.ucsc.edu/cgi-bin/hgc?hgsid=799000851\\_rdDAOY8aECs6ODSPVUt92mNOp7fR&c=NC\\_045512v2&l=14950&r=24950&o=22732&t=23137&g=unipCov2DisulfBond&i=disulf+bond](https://genome.ucsc.edu/cgi-bin/hgc?hgsid=799000851_rdDAOY8aECs6ODSPVUt92mNOp7fR&c=NC_045512v2&l=14950&r=24950&o=22732&t=23137&g=unipCov2DisulfBond&i=disulf+bond).

### Human variation at sites under constraint

We intersected all single nucleotide polymorphisms (SNPs) in TOPMed data freeze 8 (<https://topmed.nhlbi.nih.gov/>), a resource of 811 million SNPs from ~186 thousand individuals (69), with their phyloP scores. We compared minor allele frequencies for SNPs in constrained positions (phyloP > 2.27) to those in non-constrained positions using the Wilcoxon rank sum test in R v.4.1.1. We predicted the functional impact of all SNPs using SNPEff (70).

### *Constrained four-fold degenerate sites within transcription factor binding sites*

To determine whether certain transcription factors (TFs) tend to bind to constrained coding sequence [as indicated by constraint in four-fold degenerate sites (4D sites), which otherwise would not be expected to show constraint], we used bedtools intersect (187) to identify overlap of 4D sites under constraint (phyloP > 2.270) and ENCODE transcription factor clusters downloaded from the UCSC Genome Browser (<http://hgdownload.soe.ucsc.edu/goldenPath/hg38/encRegTfbsClustered/>) (187, 203). We took all the TFBS with cluster score = 1000 (reflects strength of the ChIP-seq signal, which are the highest-confidence TFBS) for each TF with TFBS in the database and counted the total number of constrained and non-constrained 4D sites overlapping TFBS for each TF. We then calculated a relative difference between constrained and non-constrained 4D sites for each TF:

$$\left( \frac{DcTF}{Dc} - \frac{DnTF}{Dn} \right) \times 100$$

Where  $DcTF$  = number of 4D constrained sites for each TF,  $Dc$  = number 4D constrained sites,  $DnTF$  = number of 4D non-constrained sites for each TF, and  $Dn$  = number of 4D non-constrained sites, giving a percentage constraint excess (positive) or deficiency (negative) for each TF. We observed that a subset of TFs show an excess of 4D constraint in their binding sites and so we further tested whether the type of transcription factor, as well as mean phyloP for the gene and amino acid coded for, have an effect on the percent of excess constrained 4D sites in TFBS using ANOVA using the ‘aov’ function and ‘anova\_test’ from the rstatix package to calculate effect sizes in R v.4.1.1.

### Constraint in functional elements

We calculated constraint enrichment for several genome features (coding sequences, 5’ UTRs, 3’ UTRs, introns, DHS, and the five types of cCREs). We obtained coding sequences, 5’ UTRs, 3’ UTRs and introns from GENCODE v.36 as described above (206). We obtained regulatory features from ENCODE3, including DNase hypersensitive sites (DHS; 243 cell lines

and tissues) (207) and candidate *cis*-regulatory elements (cCREs) (14). cCREs include canonical promoter-like signatures (PLS;  $\pm 200$  bp of GENCODE TSS, high DHS and H3K4me3 signals), proximal enhancer-like signatures (pELS;  $\pm 2$  kb of GENCODE TSS, high DHS and H3K27ac signals, low H3K4me3 signal), distal enhancer-like signatures (dELS;  $> 2$  kb from GENCODE TSS, high DHS and H3K27ac signals), DNase-H3K4me3 elements (promoter-like biochemical signature that are not within 200bp of an annotated TSS), and CTCF-only (high DNase and CTCF and low H3K4me3 and H3K27ac).

First, we calculated constrained fractions for each feature as the number of positions with phyloP above FDR=0.05 threshold/the total number of positions. Next, we calculated constraint enrichment as the constrained fraction of the feature divided by the constrained fraction of the genome. We assessed the significance of enrichment for each feature using a  $\chi^2$  test in R v.4.1.1.

### Identifying regions of high constraint

#### *Zoonomia ultraconserved elements (zooUCEs)*

We extracted all positions in the alignment bed files where the number of species aligned was  $\geq 235$  and the base was the same among all species aligned at that position. We then merged neighboring positions, creating elements of ultraconserved sequences ranging in size from 2bp to 190bp. The final set of zooUCEs contains all elements  $\geq 20$ bp. We assessed overlap between our zooUCEs and previously defined UCEs (73) using *bedtools intersect* and the “-u” flag to report all zooUCEs that overlap the original UCEs (187).

#### *Regions of contiguous constraint (RoCCs)*

We extracted all constraint positions (phyloP  $\geq 2.270$ ) from the phyloP bed files and grouped neighboring constraint positions to create runs of constraint  $\geq 2$ bp. We noticed that many of these runs were separated by only a single base pair below the phyloP threshold, so we merged all runs of constraint that were separated by only a single base, creating Regions of Contiguous Constraint (RoCC).

#### *Constraint across the genome - 100kb bins*

We divided the human genome into 100kb bins, excluding chrY, any bins with  $< 80$ kb positions with phyloP values, and bins  $< 100$ kb (i.e., ends of chromosomes), for a total of 28,218 bins. We then fit a linear model of the number of constrained bases within each bin using the total number of bases with phyloP values in the bin. We included several covariates in the model to control for differences between bins that could influence estimates of constraint: the number of coding bases, the number of positions with a low number of species aligning ( $\leq 24$ ), and a measure of mappability for each bin. For mappability, we used the “k24” UCSC Genome Browser track (83), the fraction of 24 x 24-mer sequences overlapping a given base (i.e., the current base  $\pm 23$  bp) that map uniquely to the genome (1 = all map uniquely, 0 = none map uniquely), and we summed the number of positions in each bin with k24 score  $> 0.9$ . We square root-transformed all values. We then calculated p-values from the absolute studentized residuals for each bin using the R *pnorm* function (using absolute values meant that low p-values represent significant excess or depletion of constraint), and we computed q-values from the p-values using the R function *qvalue*. We considered any bin with q-value  $\leq 0.05$  to be significant. We merged adjacent significant bins using *bedtools merge* (187). Analysis was carried out using R v4.1.1. We identified 54 bins as significant, 53 with excess and one lacking constraint. We performed a

gene set enrichment analysis on the 53 bins with excess constraint using GREAT version 4.0.4 (106) with default settings.

### *Constraint in gene deserts*

We used the set of developmental TFs identified in (208), which are all TFs known to be involved in the regulation of developmental processes (2,863 genes). We defined intergenic regions as all regions between ensembl genes (GRCh38.103) and calculated length and proportion of constraint (number of positions with phyloP  $\geq 2.270$ ) for each intergenic region. We labeled all intergenic regions as either “neighboring developmental TF” or “other” if they do or do not border a developmental TF, respectively. We extracted all gene deserts, defined as the longest 5% of intergenic regions, and compared constraint between gene deserts neighboring developmental TFs and gene deserts neighboring other genes using a Wilcoxon rank sum test in R v. 4.0.4. We tested for a significant difference in the proportion of constraint in ENCODE3 cCREs located within gene deserts neighboring developmental TFs versus those in other gene deserts with a Wilcoxon rank sum test in R v. 4.0.4. We assessed whether genes neighboring gene deserts were enriched for developmental TFs using Fisher’s exact test (“fisher.test” function in R v.4.0.4).

### Identifying Unannotated Intergenic Constraint Regions (UNICORNs)

To investigate constraint in regions lacking a functional annotation, we used the “subtract” tool in bedtools v.2.29.2 (187) to remove autosomal sequences with the following annotations: GENCODE v37 exons (UTRs and exons for all protein-coding genes) and promoters (TSS +/- 1kb), introns, ENCODE3 cCREs, DHS (including TF binding sites), ChIA-PET anchors, three promoter annotation sets, and 6 enhancer annotation sets (**Table S9**). We used liftOver (209) to convert annotations to hg38 coordinates when the annotations were in other assemblies. We then identified groups of closely located constraint positions within the “unannotated” sequences: We identified any two unannotated constraint positions within 5bp of each other and retained all clusters of such positions greater than 10bp in length, giving a set of 423,586 unannotated intergenic constraint regions (UNICORNs). We generated a set of non-constraint clusters to compare with the UNICORNs by identifying all unannotated intergenic regions greater than 10bp that did not contain any constraint positions (phyloP less than 2.270 for all positions). This generated over 6 million clusters, which we randomly sampled to generate a set to match the number of UNICORNs.

We used the “intersect” tool in bedtools v2.30.0 (187) to calculate the distance of each UNICORN and non-constraint cluster to its (linearly) closest gene, cCRE, dhs, and chromatin loop anchor (**Table S9**). We identified SNPs in each cluster from TOPMed data freeze 8 (69) and calculated average minor allele frequency and number of SNPs per bp (0-1). We then binned our UNICORNs and randomly sampled non-constraint clusters into five bins based on size (11-20bp, 21-50bp, 51-100bp, 101-500bp, 501-1,325bp). For each bin, we compared each of these measures between UNICORNs and matched non-constraint elements using Wilcoxon rank sum tests with a Bonferroni correction for multiple testing in R v.4.1.1.

To determine the extent to which UNICORNs overlap open chromatin regions from neurons in specific brain regions and motor cortex cell types as well as different parts of the brain at different developmental stages, we downloaded the relevant datasets and then determined their overlap with the UNICORNs. Specifically, for open chromatin in neurons from specific brain regions, we downloaded the NeuN+ ATAC-seq (210) data from (102) and processed them as

described for the neurons from primary motor cortex from this dataset in (15). For open chromatin from specific motor cortex neuronal cell types, we used the reproducible human motor cortex neuron open chromatin regions (99) processed in the same way as in our companion paper except for, in ArchR's addGroupCoverages, using an order of magnitude higher values for maxCells and maxFragments (159, 211). For open chromatin from different parts of the brain at different developmental stages, we used the file GSE149268\_annotation-ocr-hg38.bed.gz downloaded from GSE149268 (100); these open chromatin datasets came from later in development than the ENCODE fetal brain open chromatin data, and, unlike the ENCODE fetal brain open chromatin, which came from the whole embryo brain, these datasets came from specific brain regions (14, 212). To compute the number of UNICORNs and nucleotides within UNICORNs covered by each of these datasets as well as by the union of these datasets, we used coverageBed from bedtools (187). To compute the number of UNICORNs covered by one of the datasets and not the others, we used subtractBed and coverageBed from bedtools (187). We found that the percentage of UNICORNs covered was close to the percentage of nucleotides within UNICORNs covered.

### Curating transposable elements

The detailed methodology of TE curation efforts can be found in the companion paper (110). Here, we summarize the major steps of the process. First, we gathered final genome assemblies for each species under examination and identified putative TEs using RepeatModeler-4.0.9 (46). We assumed that most elements shared by large groups of mammals had already been described, and we focused instead on relatively new putative TEs as defined by those having hits with K2P distances (213) less than 4.4% (~20my or less since insertion) based on a general mammalian neutral mutation rate of  $2.2 \times 10^{-9}$ . Custom scripts associated with this part of the analysis are available on github ([https://github.com/davidaray/bioinfo\\_tools](https://github.com/davidaray/bioinfo_tools)).

For each iteration of manual TE curation, we generated new consensus sequences to match the top 50 blast (51) hits. Upon completion of the species-by-species curation step, we identified and removed duplicate TEs within the final library according to the 80-80-80 rule (55) and utilizing the program cd-hit-est (<https://doi.org/10.1093/bioinformatics/btq003>). We used blastx (56), RepBase (47), and TEclass (57) were to organize the library by TE type using distinguishable hallmarks of each respective TE class (214). We combined our library with the known vertebrate TE library (215) and did deduplication.

We then used the final library as an input for Repeatmasker-4.1.0 (8) to mask the genome assemblies with this custom library. We performed postprocessing of the outputs using a custom script, RM2Bed.py (available at [https://github.com/davidaray/bioinfo\\_tools](https://github.com/davidaray/bioinfo_tools)), which eliminates overlapping hits and converts files to .bed format.

Initial RepeatModeler output yielded 25,025 initial queries, ~101/assembly. After de novo curation and elimination of duplicates, the final library consisted of 7,707 consensus sequences. We have deposited these in the dfam TE database (<https://dfam.org/home>).

### Constraint in repeats

We downloaded repeat annotations for the human genome from the UCSC repeatmasker (188) track: <https://hgdownload.cse.ucsc.edu/goldenPath/hg38/database/rmsk.txt.gz>. We counted the number of constraint positions in each repeat contained in this database. For each repeat class ("Simple\_repeat", "Low\_complexity", "rRNA", "tRNA", "DNA", "Satellite", "LINE", "RC",

"srpRNA", "SINE", "Retroposon", "snRNA", "scRNA", "LTR", "RNA", and "Unknown") we calculated an estimate of excess constraint per repeat type:

$$\left(\frac{rc}{c} - \frac{rn}{n}\right) \times 100$$

where  $rc$  = total constrained positions in repeat class,  $c$  = total constrained positions within repeats,  $rn$  = total non-constrained positions in repeat class, and  $n$  = total non-constrained positions within repeats, obtaining a percentage constraint excess (positive) or deficiency (negative) for each repeat type.

Since simple repeats showed an excess of constraint, we extracted all simple repeats from the dataset and calculated distance to the nearest protein-coding gene for each one using bedtools closest (187) and RefSeq gene annotations for GRCh38 (<https://www.ncbi.nlm.nih.gov/projects/genome/guide/human/index.shtml>) (188, 216). We then calculated the Pearson product-moment correlation coefficient between the proportion of constraint and the distance to the nearest gene using the cor.test function in R v. 4.1.1.

### Identifying olfactory receptor genes

The olfactory receptor (OR) gene family shows a high frequency of duplication events that are generally unique to each lineage. We explored the OR gene family across the Zoonomia species set, independently of alignment-based annotation. We mined all genomes for OR gene sequences using the olfactory receptor assigner (ORA) (177). ORA uses profile hidden Markov-models (HMMs) to identify possible OR gene sequences while also highlighting pseudogene status. We used the reference OR protein sequences from ORA to identify putative OR gene regions in each assembly with tblastn (217, 218). We extracted the regions reported in the tblastn results, including an additional 500bp upstream and downstream to ensure coverage of the start and stop codon regions for which neither was reported, using a custom perl script (available on the Zoonomia github repository). We used these sequences, as well as all whole-genome assemblies independently as inputs for ORA. We classified sequences as “pseudogenes” if they contained in-frame stop codons or were shorter than 650bp and therefore not long enough to form the 7-transmembrane domain. We excluded any sequences that were less than 200bp and considered other pseudogenes to be “non-functional genes.” We clustered identified OR genes in each species with 99% identity using cd-hit (219) to remove putative non-paralogous duplicates. We expected two types of duplicates to be present in the data: sequences found both with tblastn and ORA and sequences that occur more than once due to duplicate contigs in the assemblies (127). To ensure that all sequences truly represented OR genes, we mapped each sequence to a database of 139 mammalian annotations available on RefSeq (216). If the highest scoring hit for a query sequence was not an annotated OR gene, we excluded the sequence. Our reference-free approach avoids potentially underestimating ORs in distantly related taxa that may have occurred due to lineage-specific genome evolution and is robust to variation in genome assembly quality [OR ~ contig N50: N=236; Spearman’s rho ( $\rho$ ) = 0.006,  $p$  = 0.93; OR~ scaffold N50: N = 236;  $\rho$  = 0.013;  $p$  = 0.84].

### Turbinal count phenotyping

We curated species-specific numbers of olfactory turbinals from both sides of the nasal cavity (Table S12) (220–240). To identify turbinal homology and compute resulting counts, we followed established nomenclature (220, 221). Our counts include frontoturbinals, ethmoturbinals, interturbinals, and the lamina semicircularis. Though the latter is not a turbinal, it exhibits a turbinal-like morphological pattern and is covered by olfactory epithelium. We did



not include nasoturbinals and the septum nasi, both of which are also partly covered by olfactory epithelium in several species (222, 223, 241), because large parts of these structures are not involved in olfaction. To date, turbinal numbers are available for 67 species of our sample. We used morphological data from only adult stages because the number and complexity of olfactory turbinals increase during postnatal growth in many species (220, 224, 242). Although the given data are available for only a small sample of species, they serve as a basis for future studies on possible associations between OR genes, phenotypes, and olfactory performance.

In our statistical analyses, we excluded certain species due to imprecise data on their turbinal morphology (e.g., *Dasyurus novemcinctus* (240)). In case of turbinal number range, we used the average for our analyses. For instance, for the domestic dog (*Canis lupus familiaris*), whose turbinal number varies widely due to extreme breed morphology (20 up to 34, n = 27 specimens (243)), we used the average (27 turbinals) for breeds with varying facial length types (brachycephalic to dolichocephalic (224, 226)). After filtering out species and combining measurements from the same species, we had turbinal counts for 64 placental mammals in Zoonomia.

### Statistical analyses on olfactory structures

We associated the number of OR genes with the number of olfactory turbinals using *phylolm* (136), a faster version of phylogenetic generalized least squares (135), with the Zoonomia phylogenetic tree (26). *phylolm* runs a generalized least squares regression to associate the number of OR gene counts with the number of olfactory turbinal counts while having a covariance matrix that is based on the phylogenetic relationships between species, thereby directly incorporating the phylogenetic tree. The “*phylolm* coefficient” is the coefficient from this regression. We computed an empirical p-value by comparing our p-value to p-values from 999,999 phylogenetic permutations (137), permutation tests in which the general phylogenetic tree topology is preserved. We used the slightly sped-up code for continuous phylogenetic permutations described in our companion paper (159). We mapped both the number of OR genes and olfactory turbinals onto the phylogenetic tree using the *countMap* function for continuous traits from the R package *phytools* (244). The state of each internal node was estimated using a fast maximum likelihood algorithm and interpolated according to equation [2] of (245).

### Associating gene conservation with hibernation

We investigated genomic differences between mammals that we defined as hibernators and as strict homeotherms (**Table S1**). The hibernator phenotype included any species exhibiting depressed body temperature (<18°C) that persists for >24 hours. We categorized species as homeothermic if experimental data showed no evidence of naturally occurring body temperature depression in the lab or field or if species did not recover from experimentally-induced hibernation or torpor (246–326). We removed n = 20 species categorized as daily heterotherms (body temperature declines persist for <24 hours) (327) from this comparison. Additionally, we removed 45 species from downstream analysis when conflicting or no evidence of hibernation had been previously described, leaving us with 22 species defined as deep hibernators and 154 species defined as strict homeotherms.

For identifying genes that are more similar to the mammalian ancestor than they are to non-hibernators through generalized least squares (GLS) forward genomics, we partitioned the exons in the 241 mammal alignment version 1 (11) into 100bp regions. For each element, we used

PREQUEL from the PHAST package (192) to compare the exonic sequences of hibernating versus strict homeotherms against the sequences of a mammalian ancestor that was constructed from the multi-way alignment containing 241 mammals in our earlier work (4, 11, 25, 192). We generated a list of conserved exonic elements by taking the intersection of mammalian-conserved regions and exonic boundaries, where we used the conserved regions previously identified based on Siphy- $\omega$  (328), and the Gencode v24 exon positions. Elements shorter than 70bp were excluded. Then, grouping the conserved exonic elements within each aligned gene, we calculated the percentage of bases aligned to the ancestral reference for each species. For all species in which at least 90% of the bases aligned among all conserved elements, we calculated the percent identity ( $\#$  identical /  $\#$  aligned) to the ancestral reference. Note that this method does have a number of limitations—it does not account for the likely effects of a sequence difference from the common ancestor (synonymous versus nonsynonymous change or type of amino acid change if the change is nonsynonymous), and it does not account for local substitution rate (changes from the common ancestor in regions with higher substitution rates are more likely to happen by chance). We then used GLS forward genomics with the Zoonomia phylogenetic tree to identify regions conserved in hibernators relative to the placental ancestor (GLS adjusted  $p < 0.05$ ), where p-value adjusted was done using the Benjamini-Hochberg procedure (26, 135, 329).

To determine if our GLS forward genomics method detected more conservation than it would from a random set of foreground species with a similar phenotype tree topology, we performed phylogenetic permutations (137). GLS forward genomics is a method for assessing phenotypic patterns in genomic data by performing linear regressions between these patterns and global percent IDs, computed values which compare extant sequences to the sequence of a common ancestor, p-values are the significance of linear regression positive slopes (16, 23). For GLS permutations, foreground species were selected as the 22 species with the highest values from phylogenetic simulations in the permutation framework. We did not impose additional requirements for number or structure of foreground species on phylogenetic branches for ancestral species. For each element that was significant from GLS forward genomics (nominal  $p < 0.05$ ), we ran GLS forward genomics for 10,000 permutations, where we allowed only permutations with 22 foreground species. We calculated permutation p-values for each element as the fraction of permutations with a p-value at least as low as the p-value for the real data and then adjusted p-values using the Benjamini-Hochberg procedure (329). Out of the 1,479 hibernation-associated elements detected by GLS analysis prior to FDR correction, 803 elements had adjusted permutation  $p < 0.05$ . All 28 significant elements from GLS forward genomics without permutations (GLS adjusted  $p \leq 0.05$ ) associated with hibernation also had significant adjusted permutation p-values (**Table S13**).

To identify genes with significant evolutionary rate shifts in hibernating mammals versus non-hibernating mammals, we used RERconverge (149). Such genes are putative hibernation-related genes. Genes with low relative evolutionary rates in hibernating mammals likely have increased constraint in hibernators and therefore potential functional importance, while genes with high relative evolutionary rates in hibernating mammals may be under relaxation of evolutionary constraint (implying decreased functional importance) or positive selection (implying increased functional importance). Note that this method cannot accurately infer the ancestral trait. To perform RERconverge analyses, we first obtained filtered alignments for 16,209 gene exon amino acid sequences and used them to estimate tree branch lengths (6, 160). We ran RERconverge using default parameters with the full 167 mammal species set for which hibernation phenotypes were known (21 hibernators and 146 non-hibernators). Species included

were those present in the protein-coding sequence alignment whose names matched species with available hibernation phenotypes. We ran `getAllResiduals` and `foreground2Paths` with the species we used supplied for the “`useSpecies`” argument and “`clade=all`” specified to `foreground2Paths` so that internal branches were assigned as foreground non-hibernators based on maximum parsimony. We performed correlation analyses using the `correlateWithBinaryPhenotype` function with default parameters. While this method enabled us to identify hundreds of genes with relative evolutionary rates associated with the evolution of hibernation, this method may have missed relevant genes because it used a human-referenced protein-coding sequence alignment, and humans are not hibernators.

We also conducted permutations to support RERconverge analyses. We conducted a modified complete case permutation approach by generating 10,000 null phenotypes with the following constraints: 1) all null phenotypes contained 21 foreground species, and 2) all null phenotypes had a number of total foreground branches no different from five from the observed hibernator phenotype. We ran RERconverge analyses as stated previously for all null phenotypes. We quantified the permutation p-value per gene as the number of permuted statistics more extreme than the observed statistic divided by the total number of permutations performed. We adjusted permutation p-values using the Benjamini-Hochberg procedure (329).

Correlated traits present a challenge for forward genomics. Many hibernators are bats, who also tend to be exceptionally long-lived given their body size. We were concerned that this might be confounding our results because we obtained genes involved in DNA repair, which is also involved in longevity. To confirm we had not unintentionally tested for associations to longevity or other traits shared by most bats but not by most other mammals, we used Bayes factor analyses to quantify the amount of signal arising from bat foreground species compared to hibernator foreground species. Using the `BayesFactor` package in R (330), we calculated per-gene linear model Bayes factors predicting RERs from either the bat phenotype or the hibernator phenotype. We then calculated the ratio of hibernator to bat Bayes factors per gene to quantify the amount of support for a gene’s relationship to one phenotype over the other—we considered Bayes factors greater than five to provide notably more support for the hibernator phenotype and therefore distinguish genes associated with hibernation from those associated with being a bat. As expected, some DNA repair genes did show signal driven by bats (SLX4 Bayes factor = 0.003, TEX15 Bayes factor = 0.318), but others showed signal driven by hibernators (PARP4 Bayes factor = 67.047, PWWP3A Bayes factor = 85.282). This suggests that some DNA repair functionalities do evolve convergently in hibernators overall and not only in bats. We considered a gene to be associated with hibernation if the adjusted p-value from RERconverge was  $< 0.05$ , the adjusted permutations p-value was  $< 0.05$ , and the Bayes factor value was  $> 5.0$ .

## **Supplementary Text**

### Additional comparisons of constraint between genes and their potential regulatory elements

Investigating enhancers is challenging because cCREs do not necessarily regulate the closest genes (331). We used the EpiMap putative enhancer-gene linking predictions (332) to link ENCODE3 proximal and distal cCREs (14) to their likely target genes. Briefly, EpiMap predicted enhancers in more than 800 cell types (including ENCODE datasets) and linked these putative enhancers to their target genes using correlation between enhancer presence and gene expression across these cell types. Using EpiMap enhancer-gene links in all cell types, we were able to link 33% and 53% of proximal and distal cCREs, respectively, to at least one gene.

We compared these region groupings to each other and observed some expected trends that have not previously been demonstrated at this scale. There is a strong positive correlation ( $\rho = 0.52$ ) between conservation of protein-coding and proximal promoter sequences. This result is consistent with the theory that, if the function of a gene in mammals requires high conservation of protein sequence, then the non-coding sequence in the proximal promoter that regulates its expression also tends to be constrained (333, 334). We also observed consistent correlation of protein sequence constraint with constraint in corresponding 5'UTRs and 3'UTRs ( $\rho = 0.54$  and  $0.45$ , respectively), and, to a lesser extent, with constraint in introns ( $\rho = 0.30$ ). To further investigate the relationship between protein-coding and regulatory conservation, we evaluated the relationship between constraint in ENCODE3 cCREs(14) and constraint in the genes that cCREs may regulate. We observed non-negligible correlation between distal cCRE constraint scores and constraint in associated CDSs and promoters ( $\rho = 0.20$  and  $0.23$ , respectively).

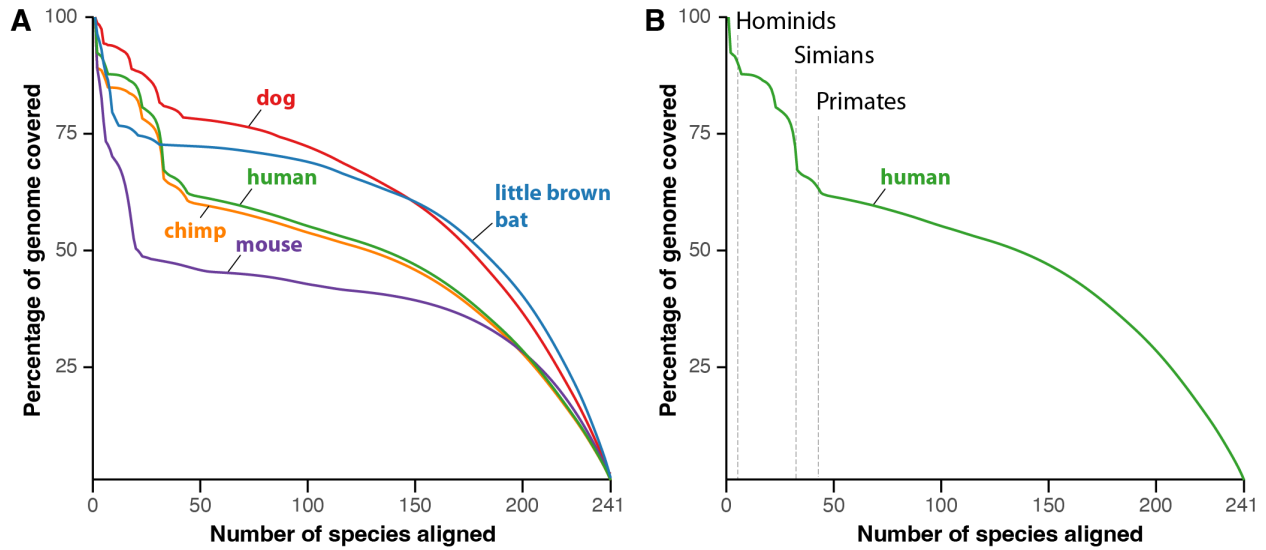

**Fig. S1. Genome alignment depth varies with phylogeny among Zoonomia species.**

(A) When the Cactus alignment is referenced on five different species, the depth of the alignment (number of species aligned) varies widely. Only a small percentage of the genome aligns in most species, with rapid drops correlating with longer branches of the phylogeny. (B) For example, in the human alignment, most of the genome is aligned in 5 other hominids, but this drops as more distantly related species are included.

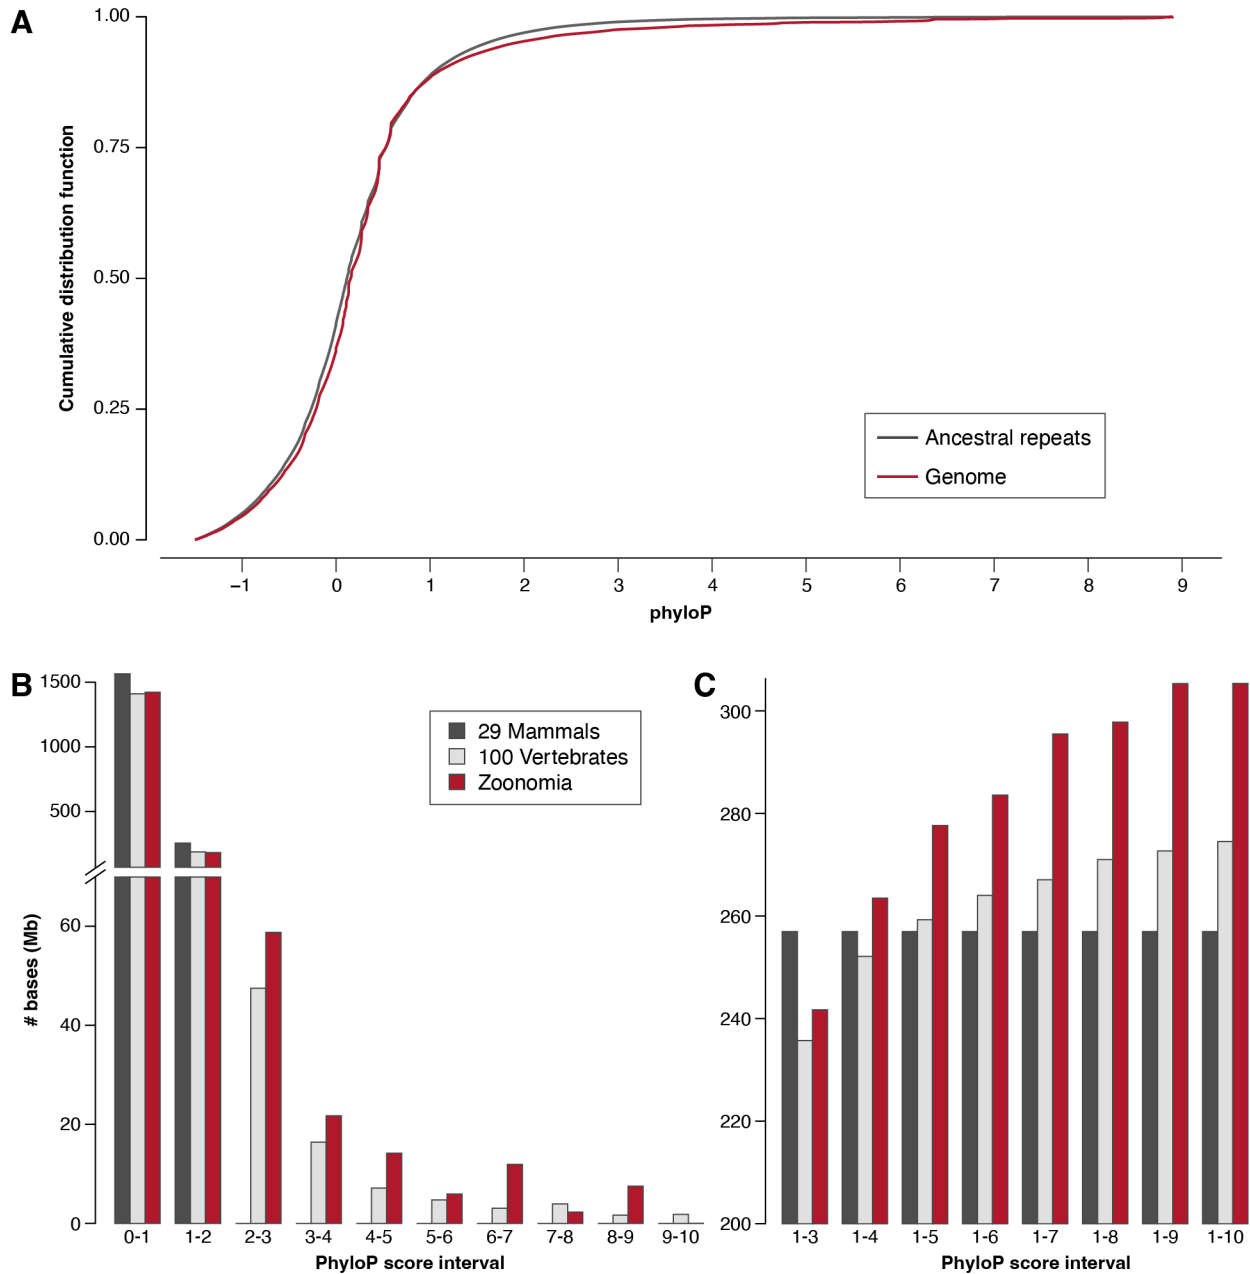

**Fig. S2. PhyloP scoring of the 240 species Zoonomia alignment detects >10.7% of genome as constrained (more than in either 29 Mammals or 100 Vertebrates).** (A) Cumulative distribution functions (CDFs) of phyloP scores across the human genome (red) and in ancestral repeats, representing neutrally evolving sequence (gray). We calculated our lower-bound estimate of constraint of 10.7% for the human genome by comparing these CDFs. (B) phyloP score bins greater than two contain more bases in Zoonomia than in 29 Mammals (which does not have any bases with scores >2) and 100 Vertebrates (which has a smaller number of high score bases). (C) In total, more bases in Zoonomia have high phyloP scores, indicating constraint.

### A. Conserved genes (top 5%)

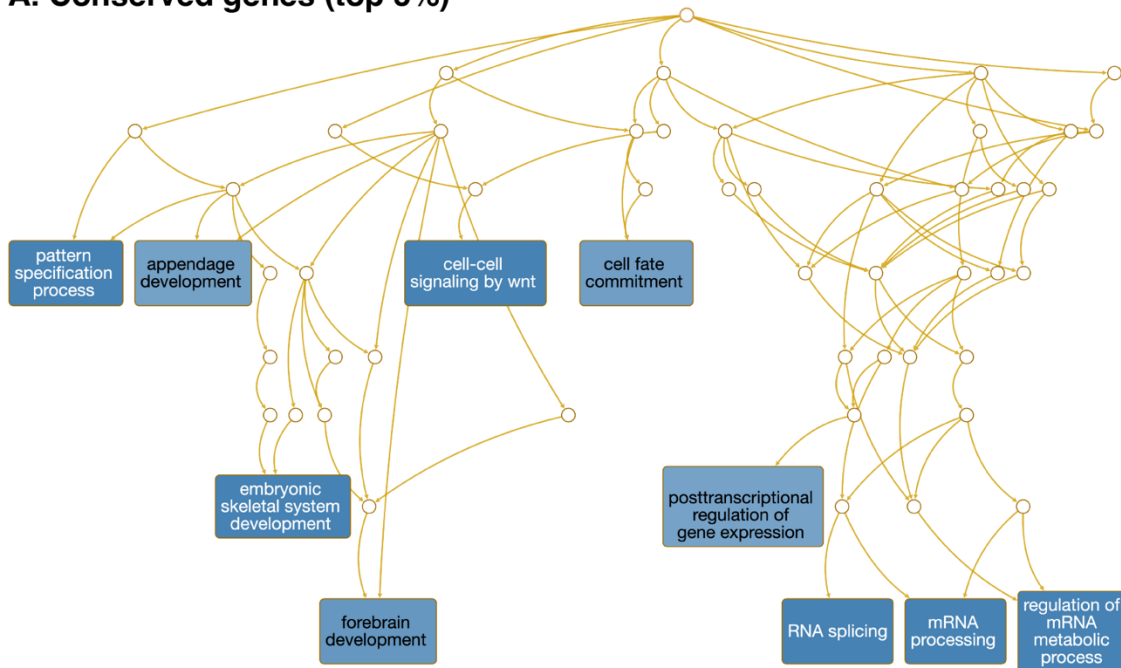

### B. Accelerated genes (top 5%)

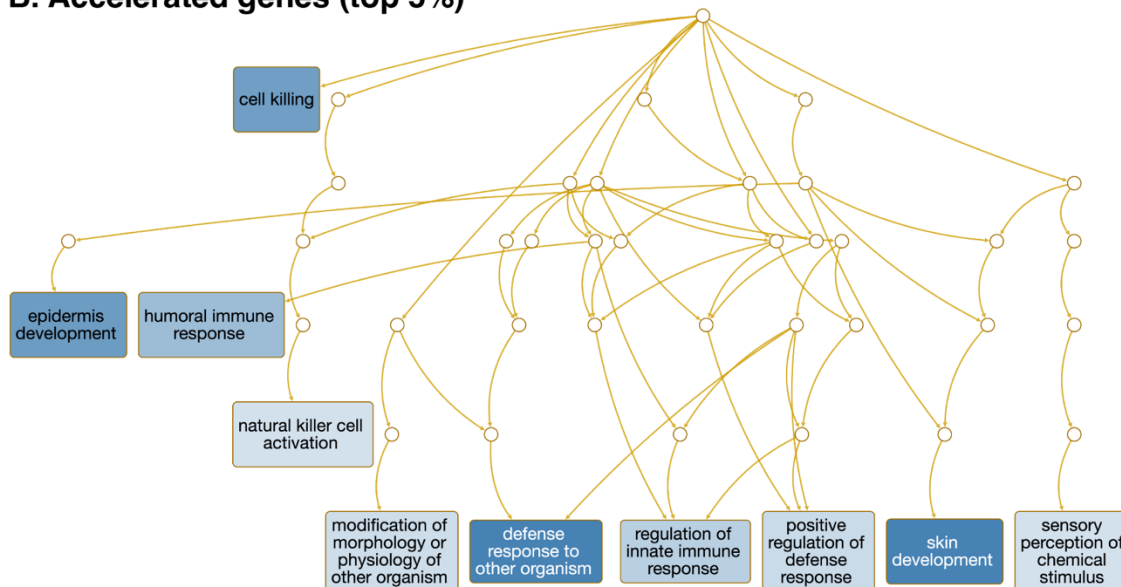

**Fig. S3. Constrained and more quickly evolving genes in mammals are enriched in some gene sets.** We tested both (A) Genes with very high average phyloP scores in protein-coding sequence and (B) genes with very low average phyloP scores in protein-coding sequence against a non-redundant representative set of Gene Ontology biological processes using WebGestalt (46–48) and plotted the top 10 overrepresented gene sets in each. All gene sets are significant after correction ( $p_{FDR} < 0.0002$ ).

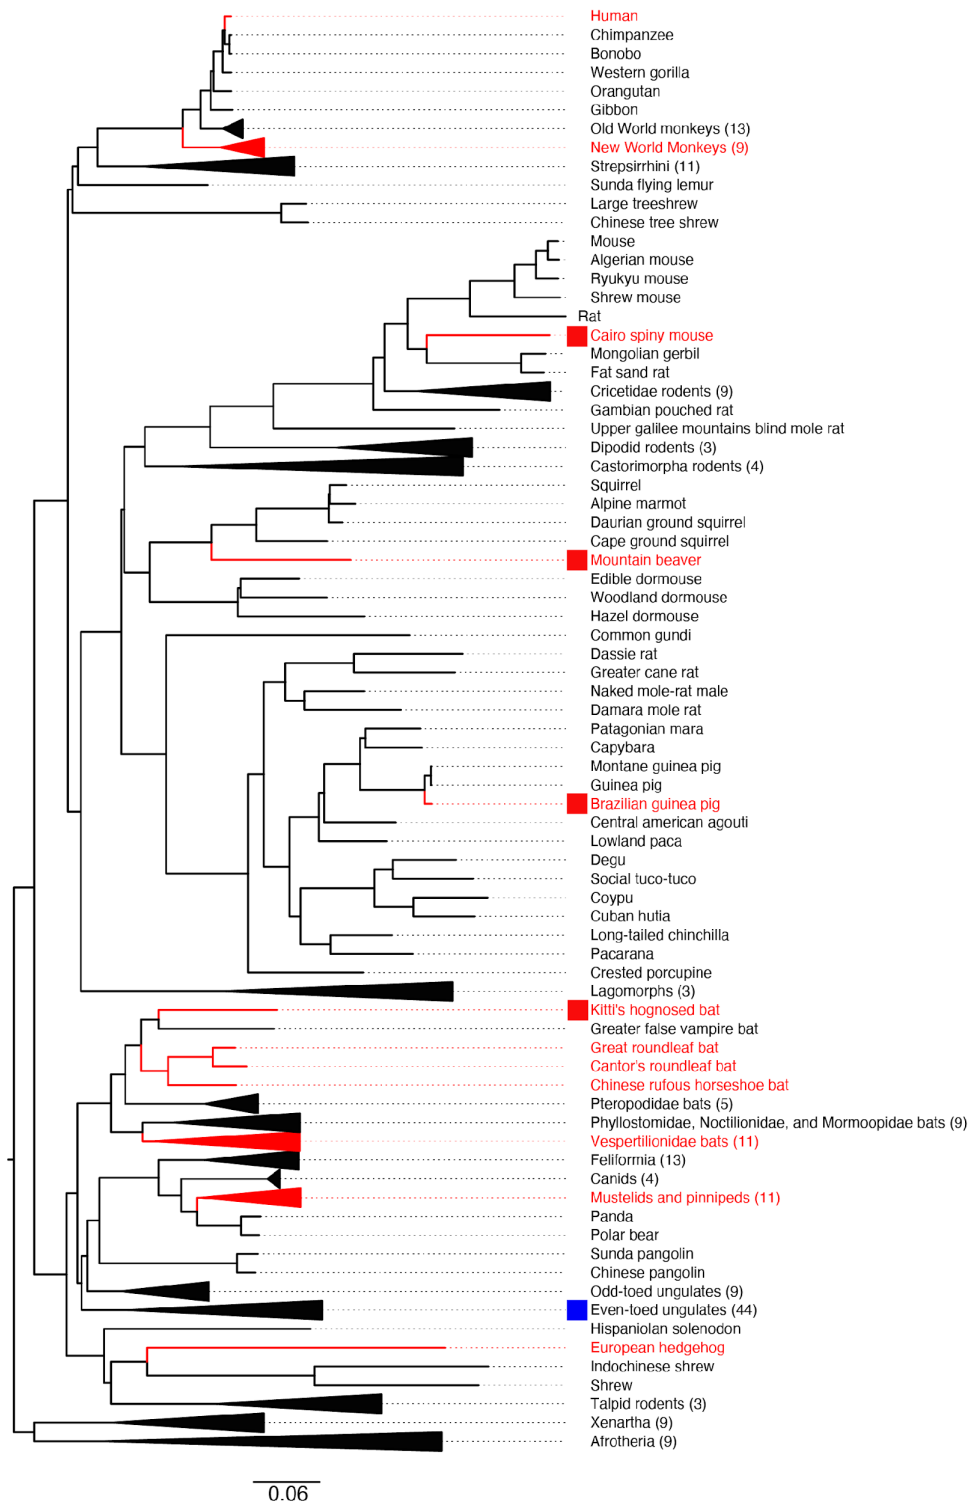

**Fig. S4. Phylogenetic tree with CMAH gene loss annotated.** Red lineages indicate CMAH loss. Red boxes indicate newly reported losses, and blue boxes indicate lineages previously reported to have lost *CMAH* but whose genomes contain intact *CMAH* coding sequence in this analysis.



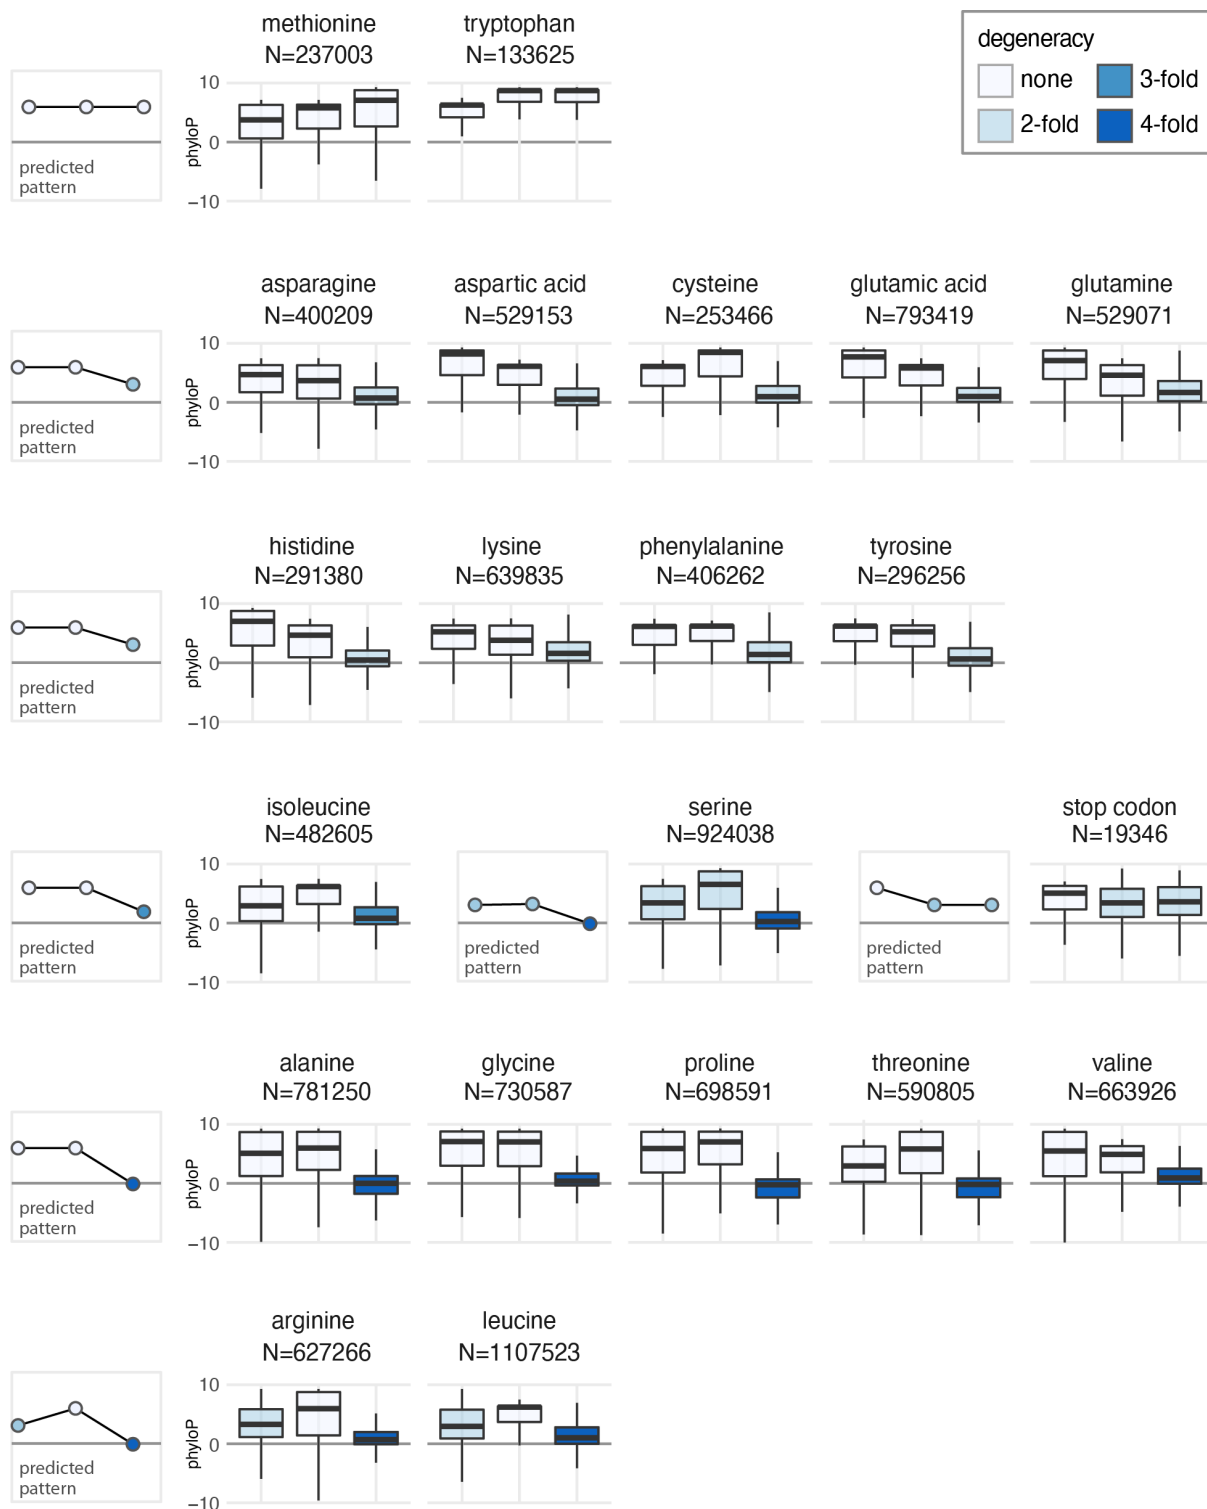

**Fig. S5. Degeneracy and constraint in codon positions.** Boxplots show the distribution of phyloP at each position within a codon for all 20 amino acids plus stop codon. Predicted patterns of constraint are based on the degeneracy for each amino acid [ranging from 0 (four-fold degenerate) to 4 (non-degenerate)]. They appear similar to the observed patterns of constraint.

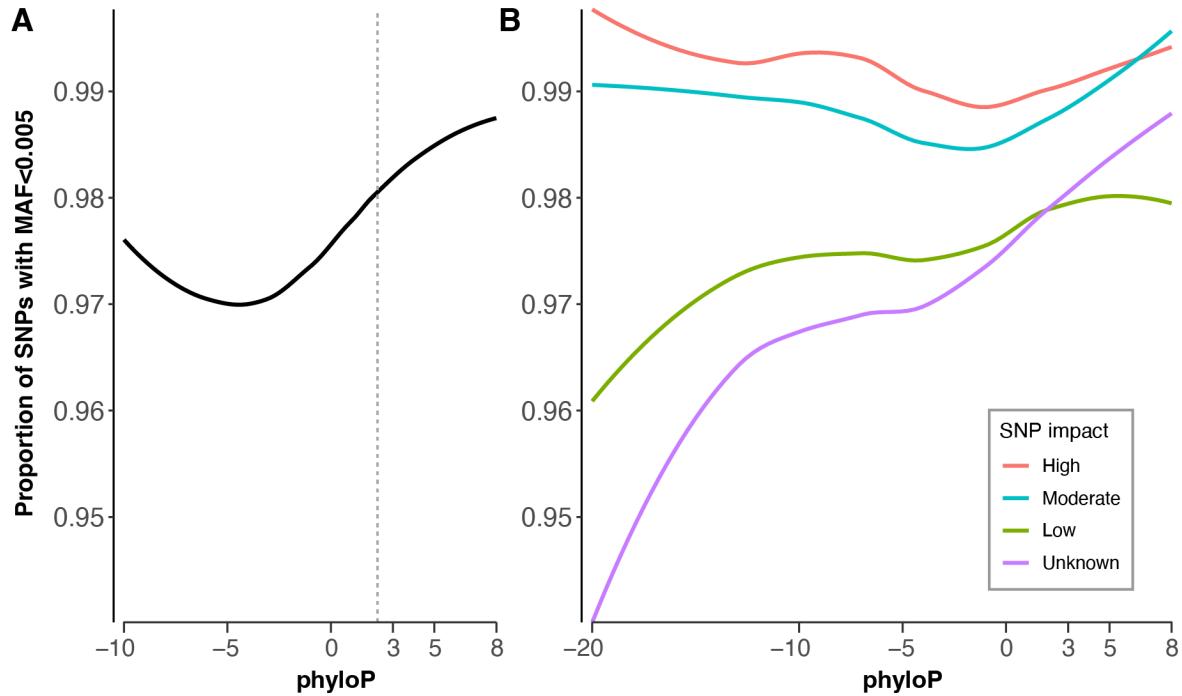

**Fig. S6. phyloP scores versus percentage of single-nucleotide polymorphisms (SNPs) with minor allele frequency < 0.005. (A)** phyloP score versus percentage of SNPs with minor allele frequency < 0.005 for all SNPs (N=622,177,419,  $\rho = 0.78$ ,  $p = 0.00014$ ). SNPs are from TOPMed data freeze 8 (69). **(B)** phyloP score versus percentage of SNPs with minor allele frequency < 0.005 for SNPs with different predicted impact levels by SNPEff: high (N=501,807,  $\rho = -0.05$ ,  $p = 0.81$ ), moderate (N=5,688,677,  $\rho = 0.39$ ,  $p = 0.18$ ), low (N=7,759,842,  $\rho = 0.60$ ,  $p = 0.0018$ ), and unknown (N=608,227,093,  $\rho = 0.98$ ,  $p = 5.45 \times 10^{-7}$ ).

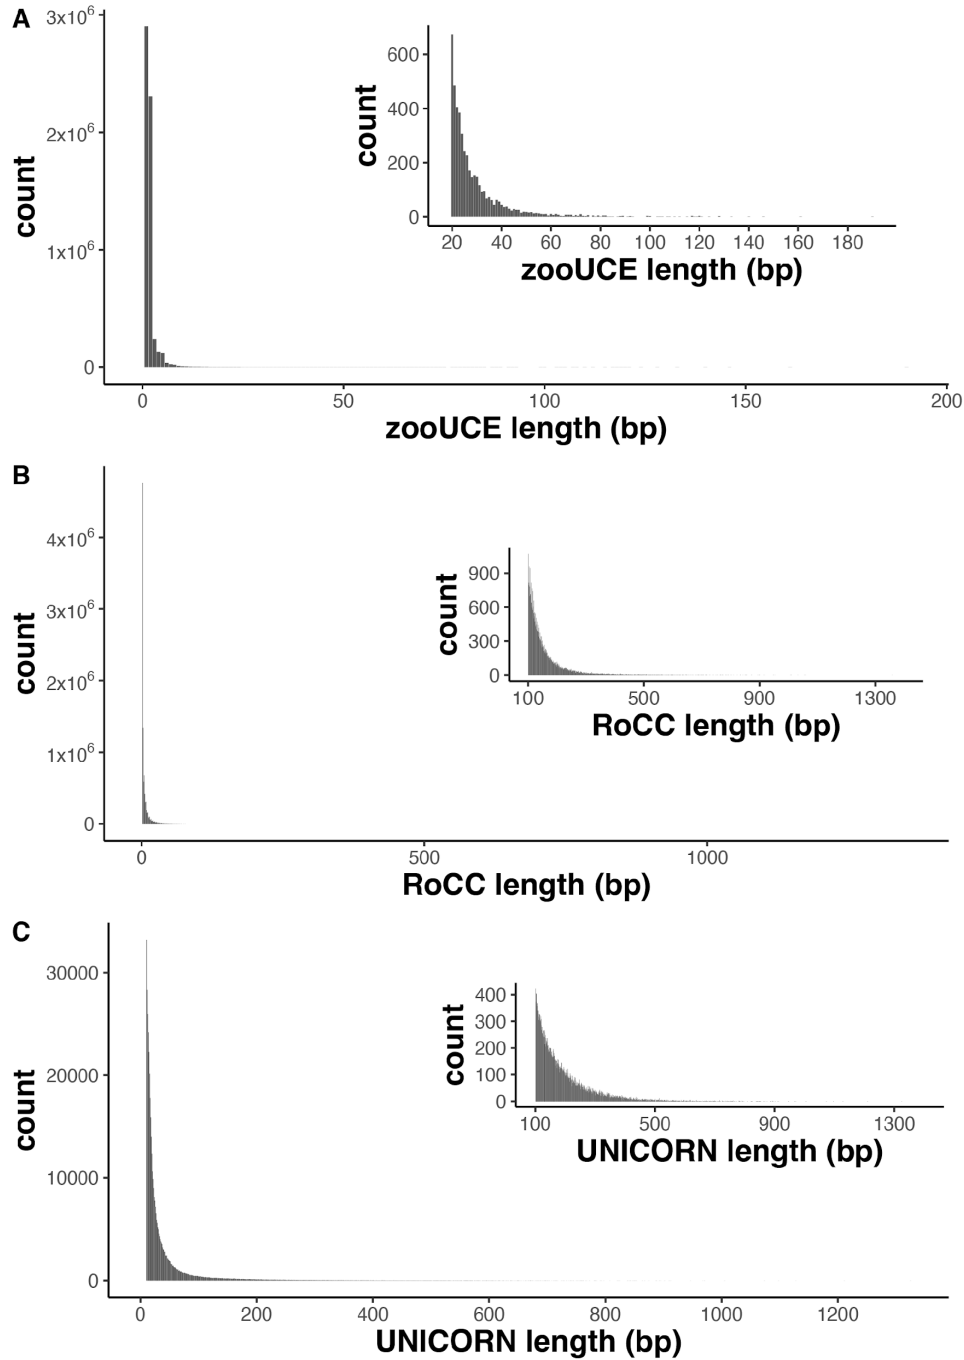

**Fig. S7. Histograms of lengths of conserved regions for different definitions of conservation. (A)** Histogram of lengths of Zoonomia ultraconserved elements (zooUCEs). **(B)** Histogram of lengths of regions of contiguous conservation (RoCCs). **(C)** Histogram of lengths of UNICORNs. Insets show distributions for shorter length elements.

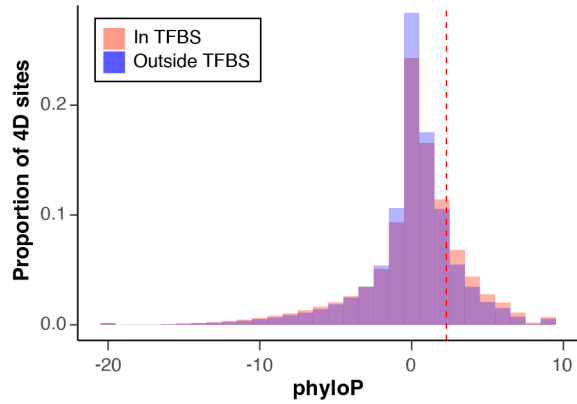

**Fig. S8. Constraint and transcription factor binding at four-fold degenerate sites. (A)** phyloP scores at four-fold degenerate sites inside versus outside of TFBS ( $N = 2,420,610$ ;  $\chi^2$  test,  $p < 2.2 \times 10^{-16}$ ). Dashed vertical line indicates phyloP threshold for significant constraint (phyloP = 2.270, FDR < 0.05). ANOVA analysis of 4D sites overlapping the 100 transcription factors with the most TFBS (20,696,533 sites) suggests that the transcription factor itself has almost no effect on the percent of excess constrained 4D sites in TFBS [effect size (generalized Eta squared or ges) = 0.006;  $p = 0$ ]. Mean phyloP for the gene explains little of the variation (ges = 0.050;  $p = 0$ ). The amino acid the site codes for has a small effect (ges=0.097;  $p = 0$ ).

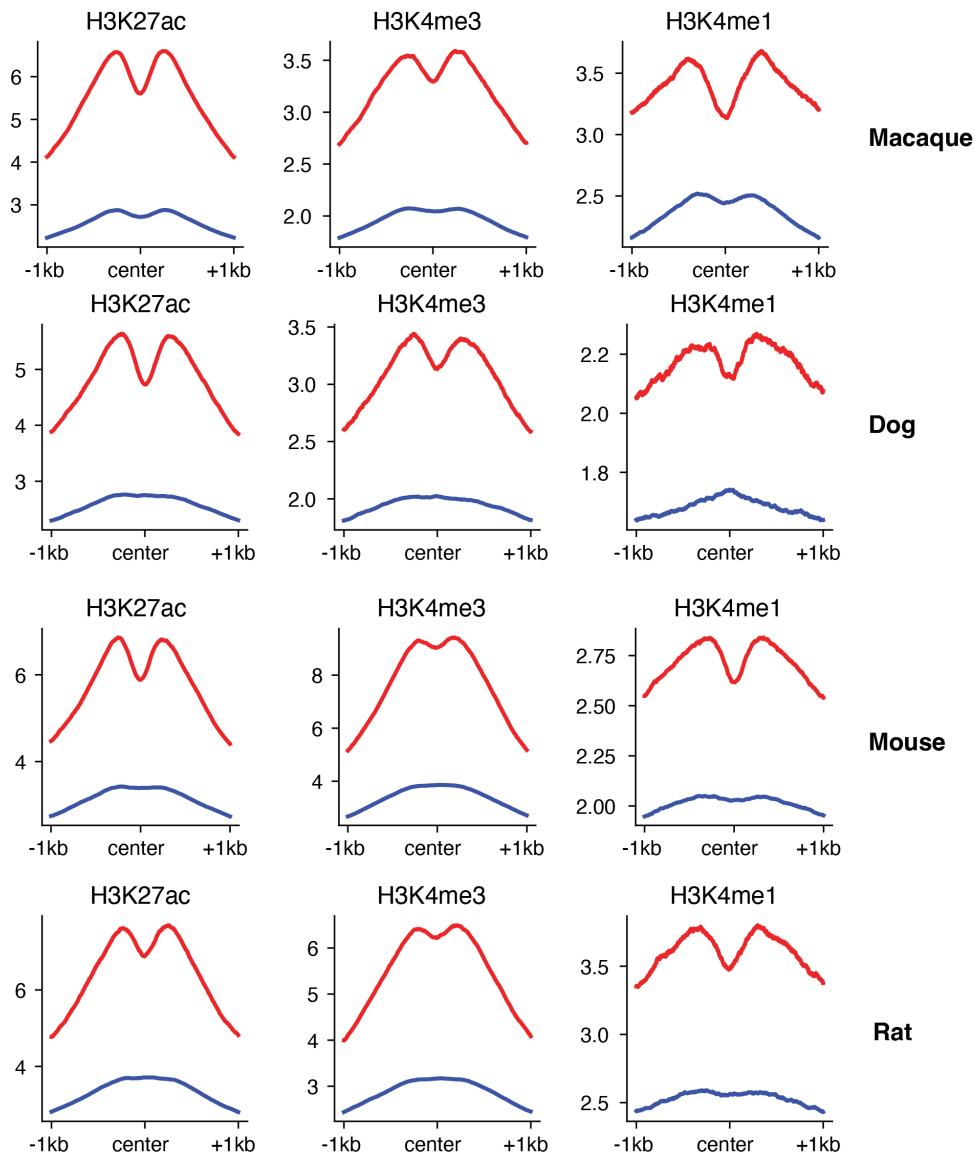

**Fig. S9. Histone marks correlated with function are enriched at constrained TFBS.** Histone marks H3K4me3, H3K27ac, and H3K4me1 active in non-human species are enriched at constrained human TFBS (red) but not at unconstrained human TFBS (blue). Y-axis shows enrichment.

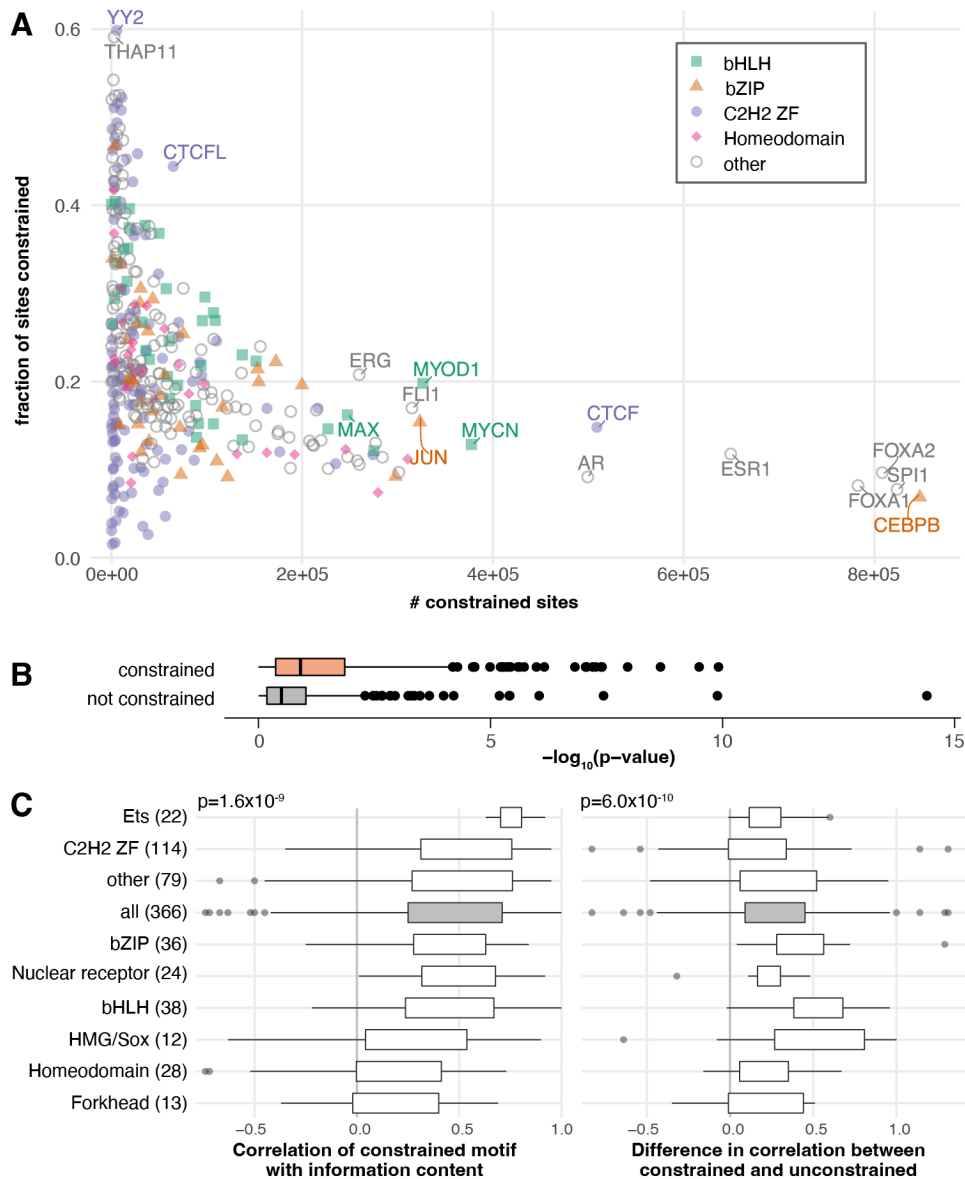

**Fig. S10. Constraint in TFBS by transcription factor.** (A) The fraction of TFBS sites in the human genome that are constrained varies by transcription factor. (B) Across all transcription factors, the correlation of phyloP with TFBS information content tends to result in lower p-values for constrained relative to unconstrained sites. (C) The correlation varies between different types of transcription factors, with the median for all types exceeding zero (left). The median difference is also greater than zero (right), indicating constrained sites are more strongly correlated than unconstrained sites. The significance of the effect of transcription factor family (excluding “all”) on variation in each metric, measured using ANOVA, is shown in upper left.

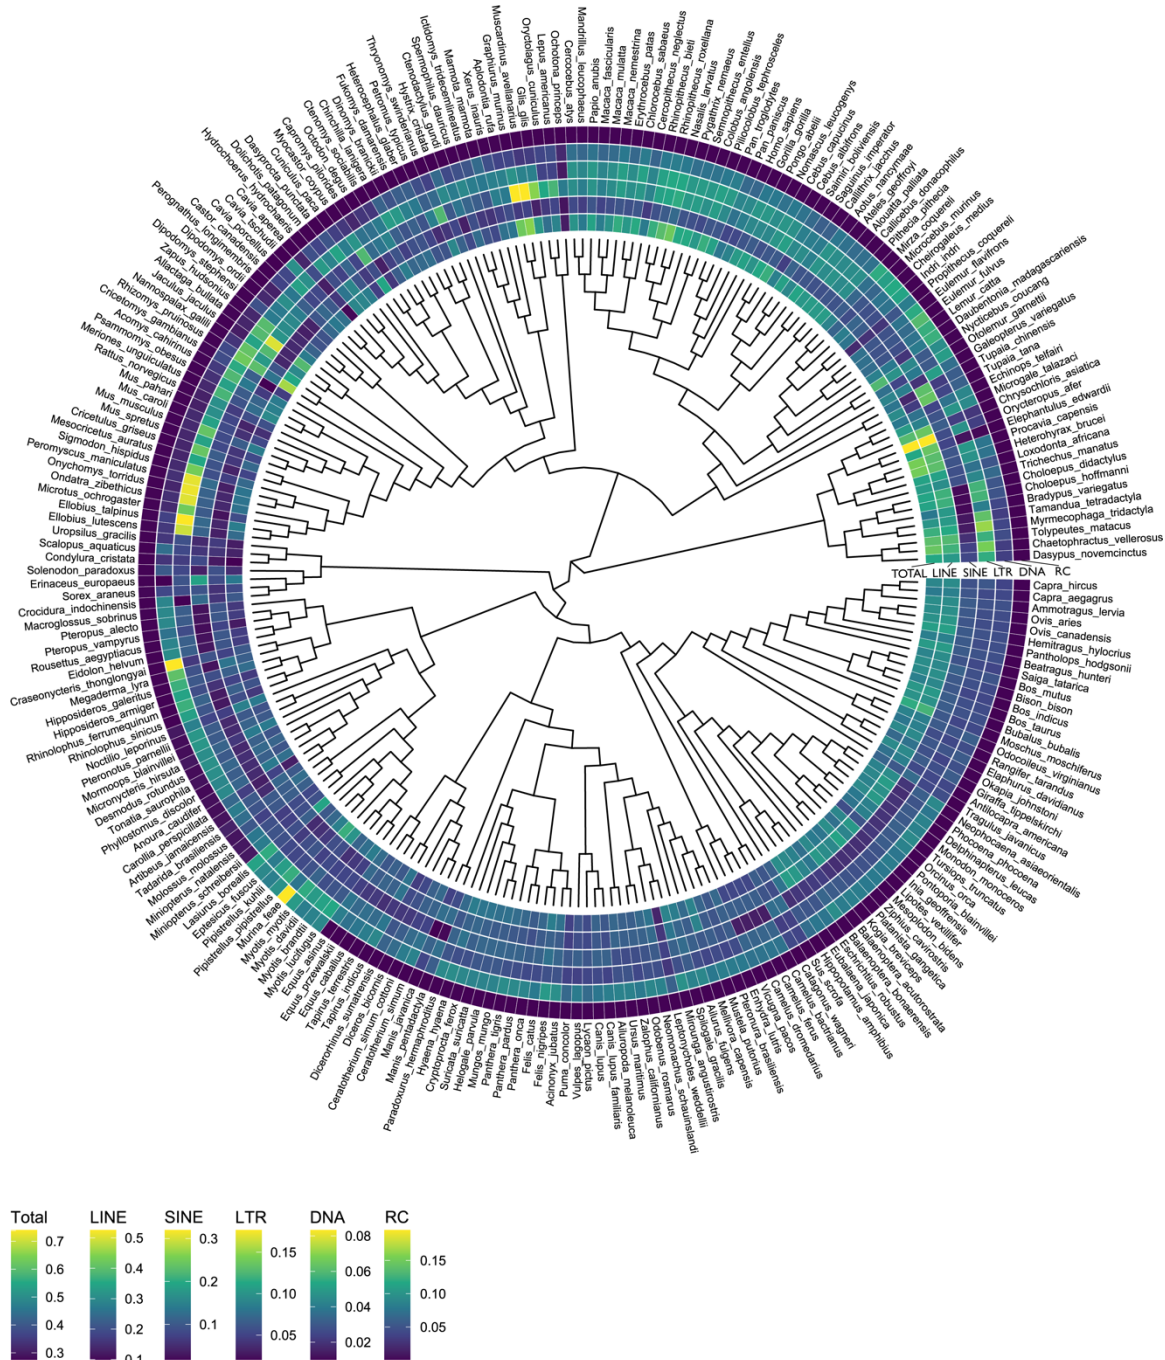

**Fig. S11. Proportion of genomic content attributed to transposable element accumulation within a phylogenetic context.** The rings, from inner to outer, depict the transposable element accumulation data as proportions of the total genome assembly: all transposable element content, LINES, SINES, LTRs, DNA transposons, rolling-circle transposons. Cladogram adapted from (26).

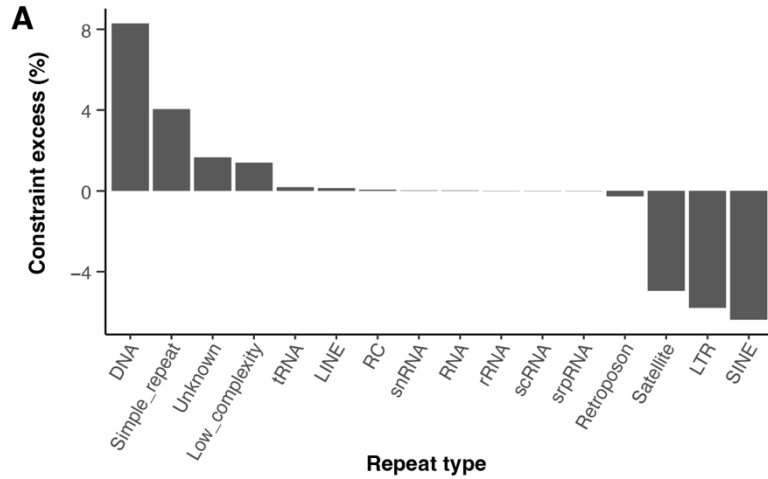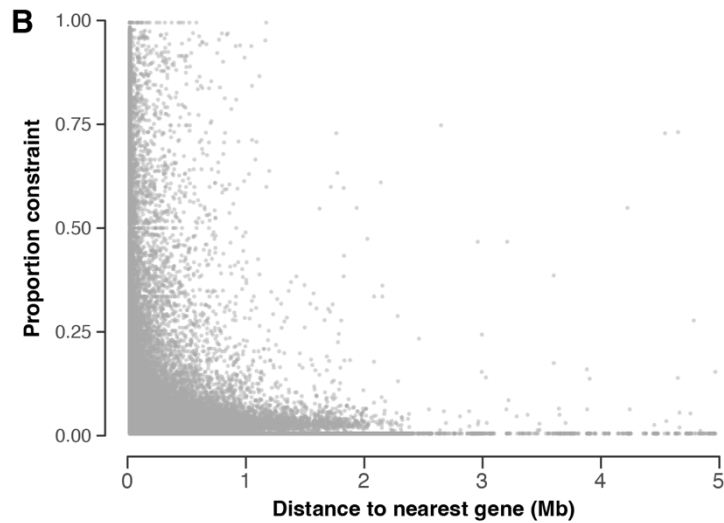

**Fig. S12. Constraint of repeats. (A)** Percentage of excess or depletion of constraint in each human repeat class. **(B)** Distance to nearest protein-coding transcription start site versus proportion of positions under constraint (phyloP > 2.27) for all human simple repeats.



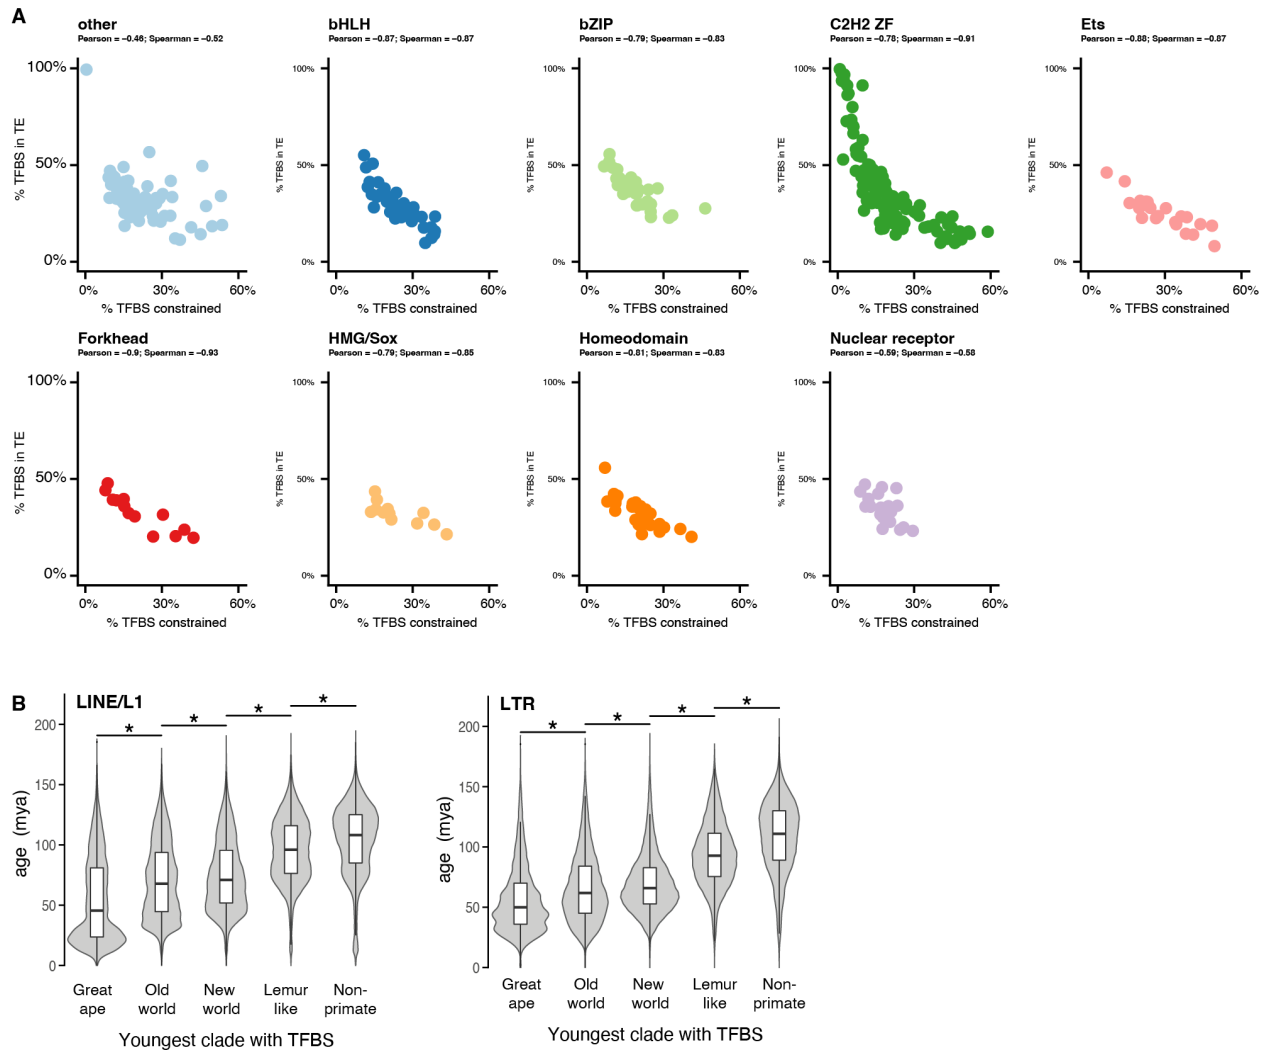

**Fig. S13. Transcription factor binding sites (TFBS) in transposable elements. (A)** Percent of TFBS found in a transposable element versus the percent found to be evolutionary constrained for 368 transcription factors, separated by family. **(B)** TFBS shared in only more closely related species tend to be on younger transposable elements, and vice versa.

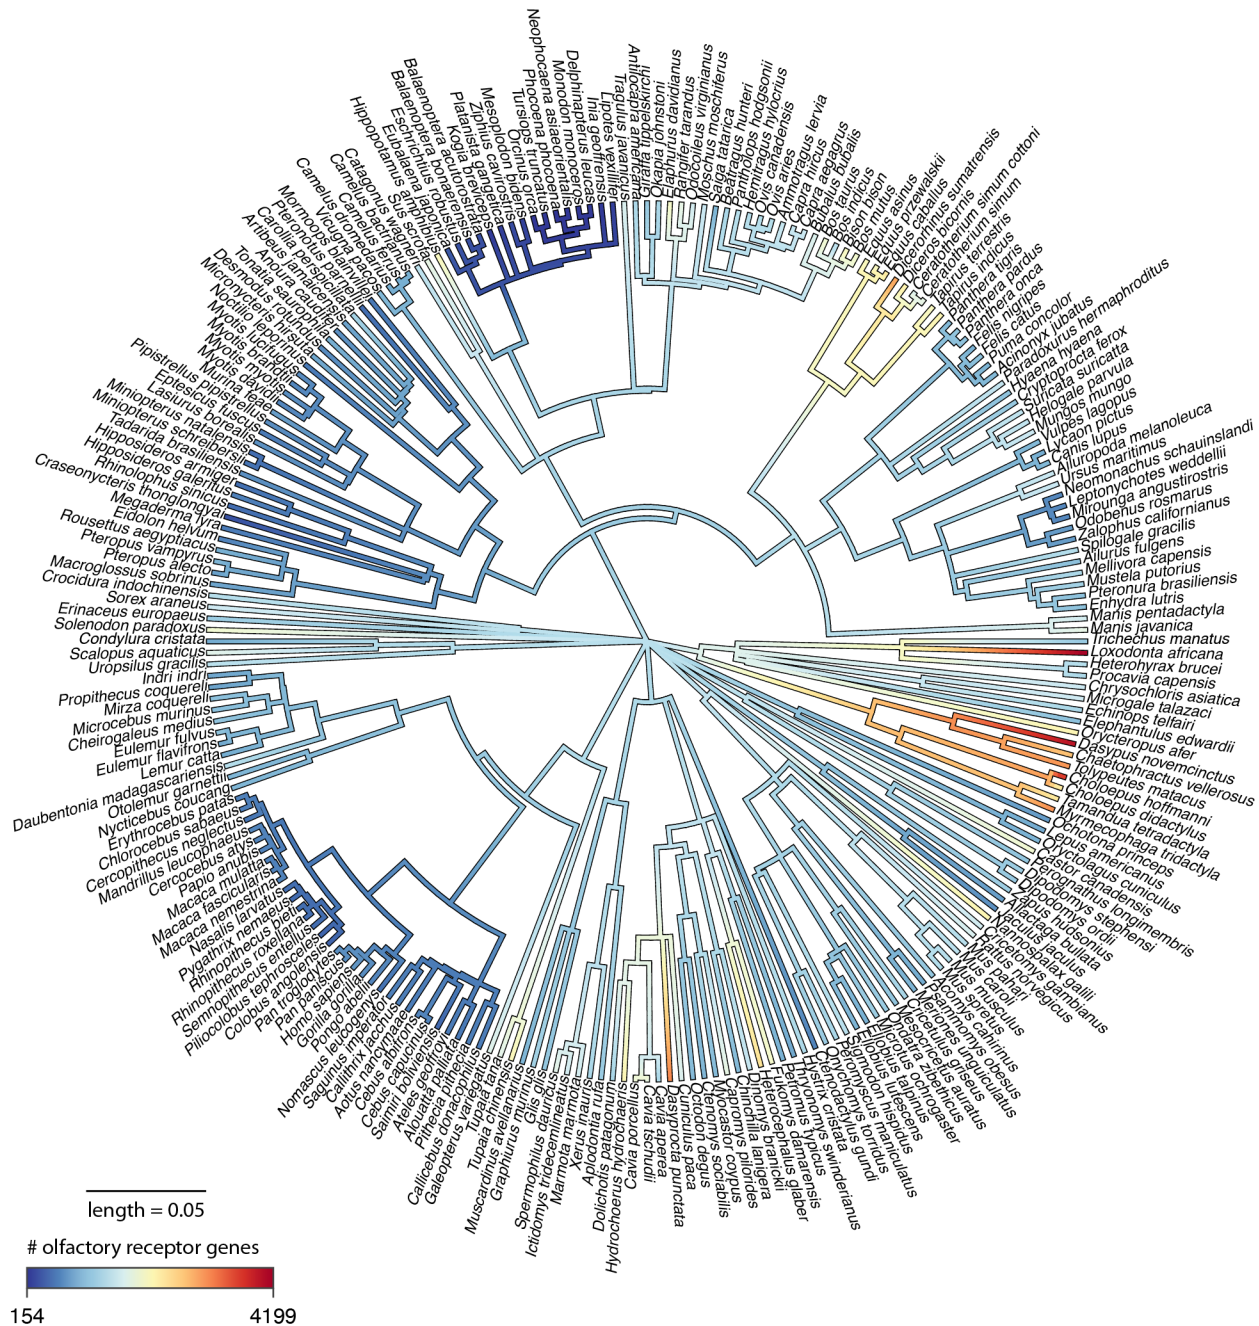

**Fig. S14. Phylogenetic tree annotated with the number of olfactory receptor genes in each species.** Branches are colored by the total number of olfactory receptor genes (functional and non-functional). States at internal nodes were estimated with the R package phytools which uses a maximum likelihood algorithm (244). “length = 0.05” shows the branch length scale of the phylogenetic tree.

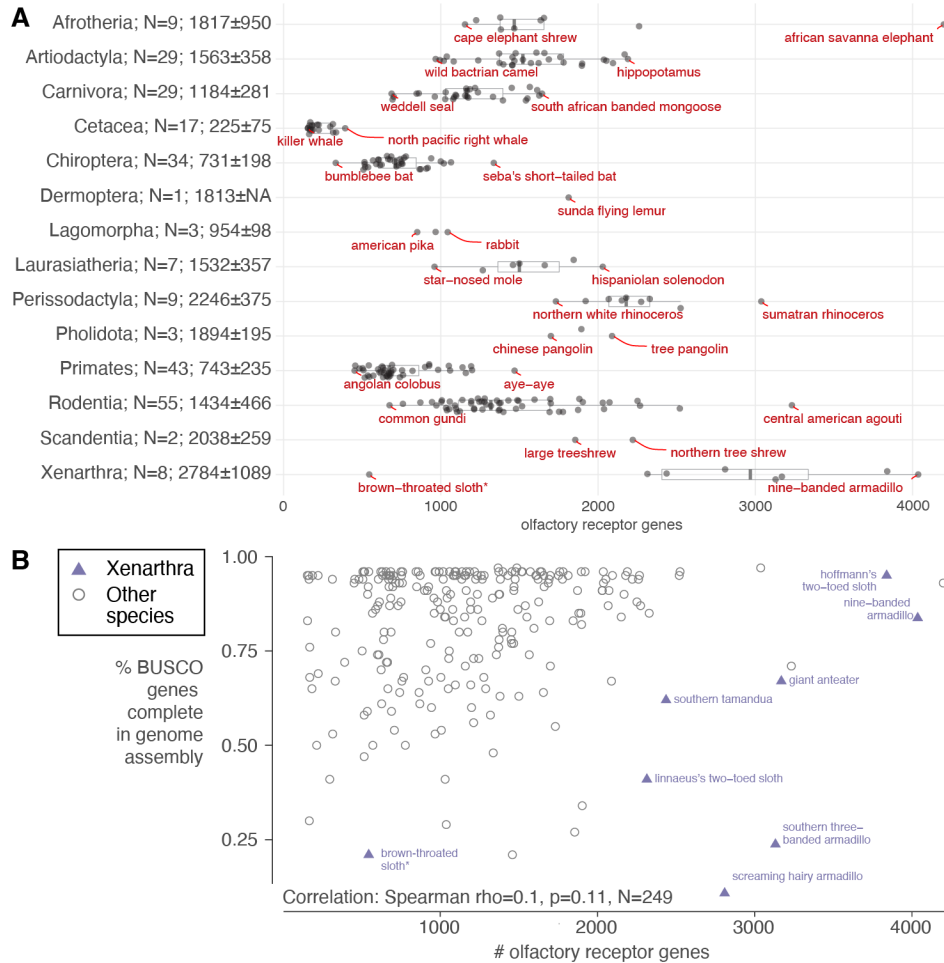

**Fig. S15. Olfactory receptor gene number for each species grouped by mammalian clade.** (A) The number of olfactory receptor genes for each species in mammalian clades (gray dots), with boxplots showing the distribution for all clades with more than three species surveyed. The box represents 25%/75% quartile with a horizontal line at the median, and the vertical line demarkating 5-95% quartiles. Red text labels the top and bottom species in each order. (B) There is no significant correlation between the completeness of a genome assembly (measured as percent of BUSCO (*129*) genes that are complete) and the number of olfactory receptor genes detected. Estimates for incomplete assemblies that are unusually low compared to other species in the clade, as for the brown-throated sloth (starred) compared to other xenarthrans, should be validated.

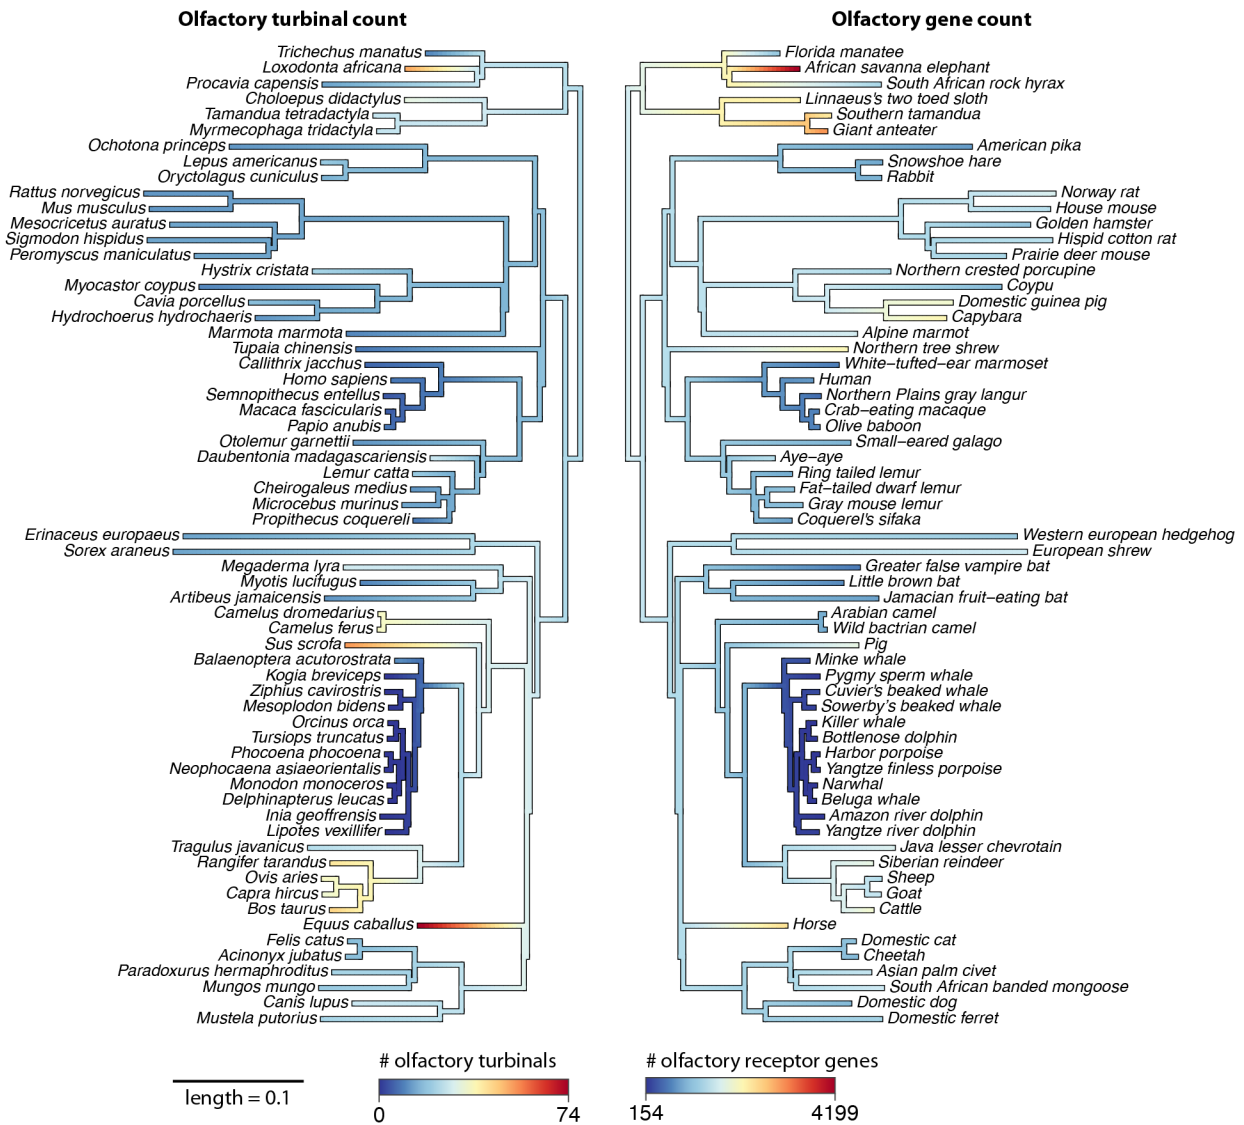

**Fig. S16. Phylogenetic trees annotated with number of olfactory turbinals (left) and olfactory receptor gene counts (right).** Species included are the subset of species with both olfactory receptor gene counts and number of olfactory turbinal annotations. Species' binomial names are listed on the left, and species' common names are listed on the right. States at internal nodes were estimated with the R package phytools which uses a maximum likelihood algorithm (244). "length = 0.1" shows the branch length scale of the phylogenetic tree.

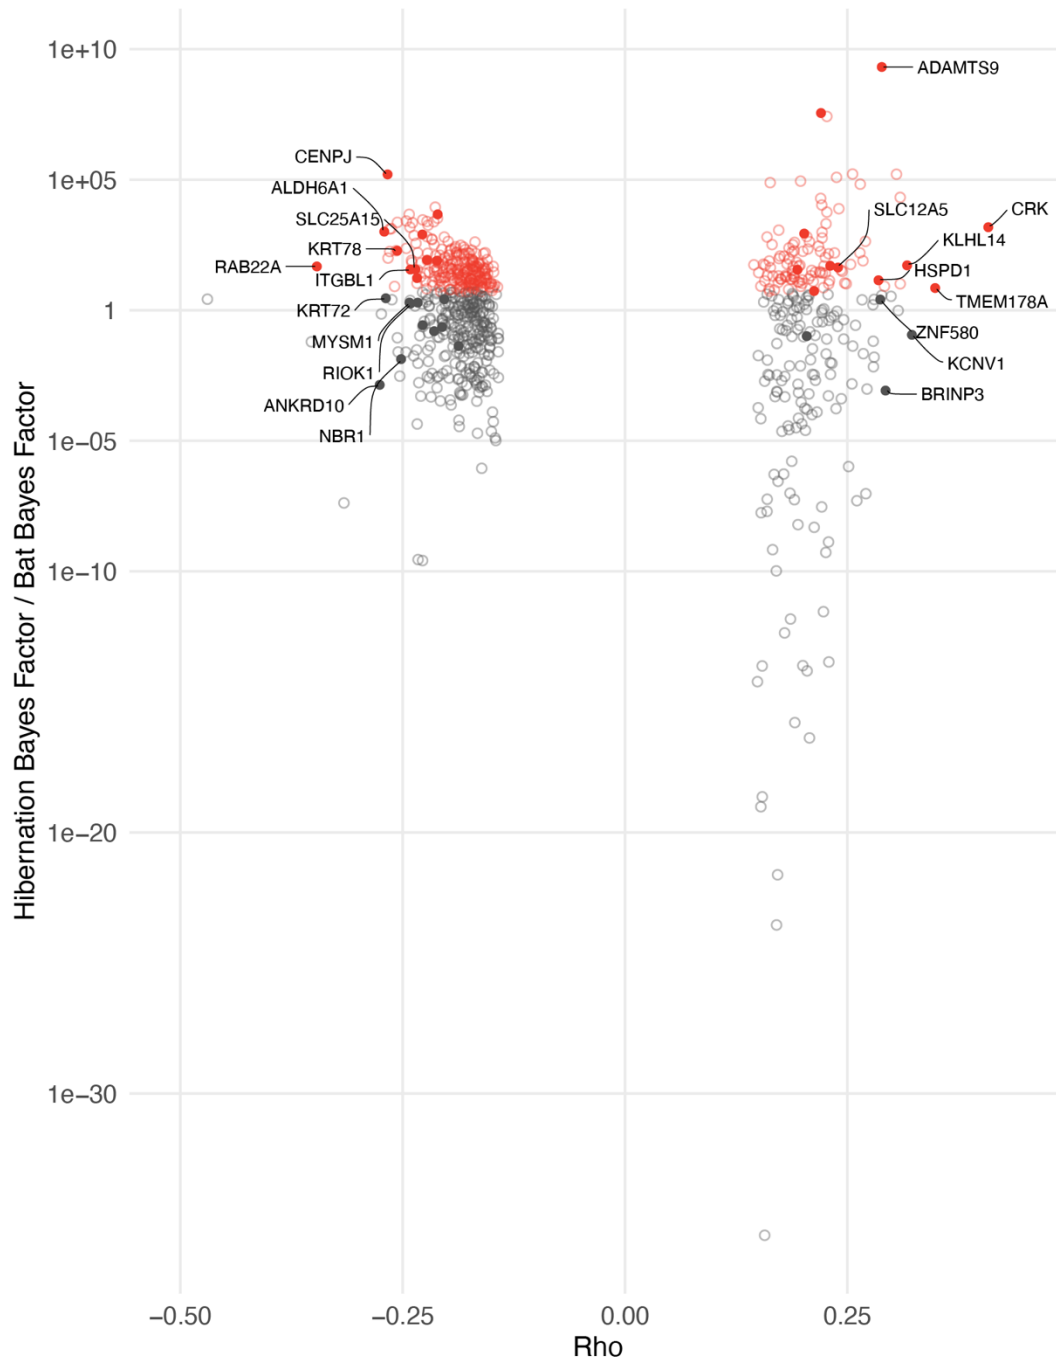

**Fig. S17. Hibernation RERconverge Bayes factor analysis.** Per-gene associations between the relative evolutionary rate and hibernation across mammal species (RERconverge Rho; x-axis) compared to the ratio of Bayes factors testing the hibernation phenotype and the bat phenotype (y-axis) for all genes with RERconverge  $p_{FDR} < 0.05$ . Filled circles represent genes that are significant after testing through permutations (permutation  $p_{FDR} < 0.05$ ). The 20 genes with the highest absolute Rho are labeled. For some genes, the association may be confounded by high frequency of hibernation phenotype in bats (gray, ratio  $< 5$ ), while others are more confidently associated with hibernation (red).

**A** Evolving faster in hibernators

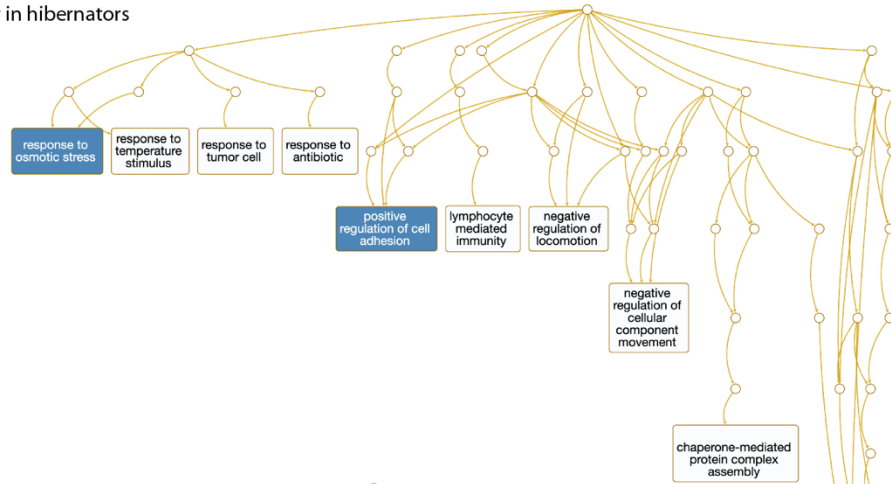

**B** Evolving slower in hibernators

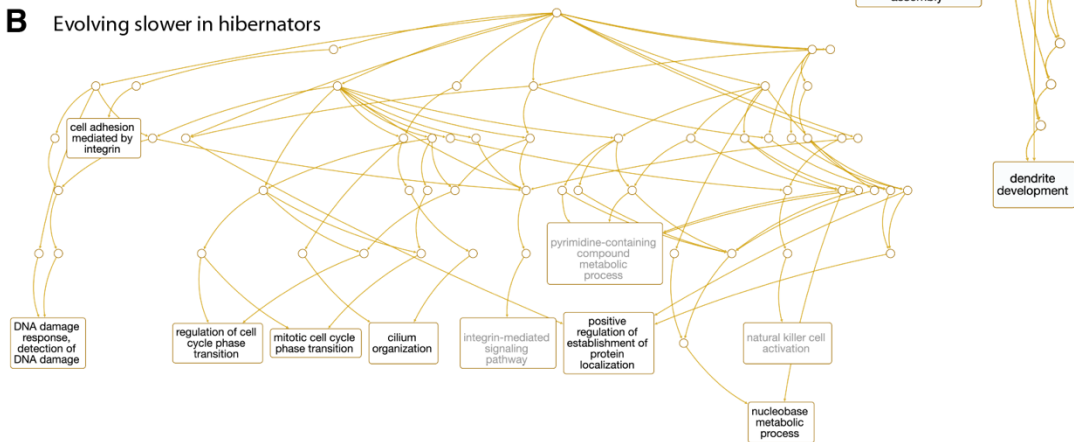

**Fig. S18. Genesets enriched for hibernation-associated genes.** We tested all 22 genes significantly associated with hibernation against a non-redundant representative set of Gene Ontology biological processes using WebGestalt (46–48) and plotted the top 10 gene sets for **(A)** 11 genes evolving faster in hibernators and **(B)** 11 genes evolving more slowly than expected in hibernators. No gene sets were significant after correction (all had  $p_{FDR} > 0.05$ ). Seventeen gene sets were nominally significant ( $p < 0.05$ ; black text) (Table S15). The top two sets (blue shading) are response to osmotic stress ( $p = 9.1 \times 10^{-4}$ ;  $p_{FDR} = 0.58$ ; genes SCN2A and SLC12A5) and positive regulation of cell adhesion ( $p = 0.0014$ ;  $p_{FDR} = 0.58$ ; genes DENND6A, HSPD1, and CRK).



| Species                                    | Common Name               | IUCN Status | Bio-diversity Analysis | TOGA | Cactus | Primate phastCons | Phylo geny | Repeat Annotated | Hibernation | Brain Size Residual | Vocal Learning |
|--------------------------------------------|---------------------------|-------------|------------------------|------|--------|-------------------|------------|------------------|-------------|---------------------|----------------|
| <i>Acinonyx jubatus</i>                    | cheetah                   | VU          | Yes                    | Yes  | Yes    | No                | Yes        | Yes              | No          | -0.1698             | No             |
| <i>Acomys cahirinus</i>                    | cairo spiny mouse         | LC          | Yes                    | Yes  | Yes    | No                | Yes        | Yes              | NA          | -0.0135             | No             |
| <i>Acomys russatus</i>                     | golden spiny mouse        | LC          | No                     | Yes  | No     | No                | No         | No               | NA          | NA                  | NA             |
| <i>Aeorestes cinereus</i>                  | hoary bat                 | NA          | No                     | Yes  | No     | No                | No         | No               | NA          | NA                  | NA             |
| <i>Aepyceros melampus</i>                  | impala                    | LC          | No                     | Yes  | No     | No                | No         | No               | NA          | -0.0674             | NA             |
| <i>Ailuropoda melanoleuca</i>              | giant panda               | VU          | Yes                    | Yes  | Yes    | No                | Yes        | Yes              | No          | -0.1348             | No             |
| <i>Ailurus fulgens</i>                     | lesser panda              | EN          | Yes                    | Yes  | Yes    | No                | Yes        | Yes              | No          | 0.1196              | No             |
| <i>Alces alces</i>                         | eurasian elk              | LC          | No                     | Yes  | No     | No                | No         | No               | NA          | -0.0763             | NA             |
| <i>Allactaga bullata</i>                   | gobi jerboa               | LC          | Yes                    | Yes  | Yes    | No                | Yes        | Yes              | Yes         | NA                  | No             |
| <i>Allenopithecus nigroviridis</i>         | allen's swamp monkey      | LC          | No                     | Yes  | No     | No                | No         | No               | NA          | 0.2726              | NA             |
| <i>Alligator sinensis</i>                  | chinese alligator         | NA          | No                     | No   | No     | No                | No         | No               | NA          | NA                  | NA             |
| <i>Alouatta palliata</i>                   | mantled howler            | EN          | Yes                    | Yes  | Yes    | Yes               | Yes        | Yes              | No          | 0.1283              | No             |
| <i>Ammotragus lervia</i>                   | aoudad                    | VU          | Yes                    | Yes  | Yes    | No                | Yes        | Yes              | No          | -0.201              | No             |
| <i>Anoura caudifer</i>                     | tailed tailless bat       | LC          | Yes                    | Yes  | Yes    | No                | Yes        | Yes              | NA          | 0.1199              | NA             |
| <i>Antidorcas marsupialis</i>              | springbok                 | LC          | No                     | Yes  | No     | No                | No         | No               | NA          | -0.0316             | NA             |
| <i>Antilocapra americana</i>               | pronghorn                 | LC          | Yes                    | Yes  | Yes    | No                | Yes        | Yes              | No          | -0.1434             | No             |
| <i>Antrozous pallidus</i>                  | pallid bat                | LC          | No                     | Yes  | No     | No                | No         | No               | NA          | NA                  | NA             |
| <i>Aonyx cinereus</i>                      | Asian small-clawed otter  | NA          | No                     | Yes  | No     | No                | No         | No               | NA          | NA                  | NA             |
| <i>Aotus nancymaae</i>                     | nancy ma's night monkey   | VU          | Yes                    | Yes  | Yes    | Yes               | Yes        | Yes              | No          | NA                  | No             |
| <i>Aplodontia rufa</i>                     | mountain beaver           | LC          | Yes                    | Yes  | Yes    | No                | Yes        | Yes              | No          | -0.0722             | No             |
| <i>Apodemus sylvaticus</i>                 | long-tailed field mouse   | LC          | No                     | Yes  | No     | No                | No         | No               | NA          | 0.0534              | NA             |
| <i>Arctocepalus gazella</i>                | antarctic fur seal        | LC          | No                     | Yes  | No     | No                | No         | No               | NA          | 0.0527              | NA             |
| <i>Artibeus jamaicensis</i>                | jamaican fruit-eating bat | LC          | Yes                    | Yes  | Yes    | No                | Yes        | Yes              | NA          | 0.0553              | NA             |
| <i>Arvicantis niloticus</i>                | african arvicantis        | LC          | No                     | Yes  | No     | No                | No         | No               | NA          | -0.0613             | NA             |
| <i>Arvicola amphibius</i>                  | eurasian water vole       | LC          | No                     | Yes  | No     | No                | No         | No               | NA          | -0.1948             | NA             |
| <i>Ateles geoffroyi</i>                    | geoffroy's spider monkey  | EN          | Yes                    | Yes  | Yes    | Yes               | Yes        | Yes              | No          | 0.4599              | No             |
| <i>Axis porcinus</i>                       | hog deer                  | EN          | No                     | Yes  | No     | No                | No         | No               | NA          | 0.0544              | NA             |
| <i>Babyrousa celebensis</i>                | North Sulawesi babirusa   | NA          | No                     | Yes  | No     | No                | No         | No               | NA          | NA                  | NA             |
| <i>Balaena mysticetus</i>                  | bowhead                   | LC          | No                     | Yes  | No     | No                | No         | No               | NA          | -1.2719             | NA             |
| <i>Balaenoptera acutorostrata scammoni</i> | minke whale               | LC          | Yes                    | Yes  | Yes    | No                | Yes        | No               | No          | -0.3456             | NA             |
| <i>Balaenoptera bonaerensis</i>            | antarctic minke whale     | NT          | Yes                    | Yes  | Yes    | No                | Yes        | Yes              | No          | NA                  | NA             |
| <i>Balaenoptera edeni</i>                  | bryde's whale             | LC          | No                     | Yes  | No     | No                | No         | No               | NA          | NA                  | NA             |
| <i>Balaenoptera musculus</i>               | blue whale                | EN          | No                     | Yes  | No     | No                | No         | No               | NA          | -0.9595             | NA             |
| <i>Balaenoptera physalus</i>               | fin whale                 | VU          | No                     | Yes  | No     | No                | No         | No               | NA          | -0.8794             | NA             |
| <i>Bassariscus astutus</i>                 | ringtail                  | NA          | No                     | Yes  | No     | No                | No         | No               | NA          | NA                  | NA             |
| <i>Bassariscus sumichrasti</i>             | cacomistle                | LC          | No                     | Yes  | No     | No                | No         | No               | NA          | 0.306               | NA             |
| <i>Beatragus hunteri</i>                   | hirola                    | CR          | Yes                    | Yes  | Yes    | No                | Yes        | Yes              | No          | NA                  | No             |
| <i>Bison bison</i>                         | american bison            | NT          | Yes                    | Yes  | Yes    | No                | Yes        | Yes              | No          | -0.3054             | No             |
| <i>Bos frontalis</i>                       | gaur                      | NA          | No                     | Yes  | No     | No                | No         | No               | NA          | NA                  | NA             |
| <i>Bos gaurus</i>                          | gaur                      | VU          | No                     | Yes  | No     | No                | No         | No               | NA          | NA                  | NA             |
| <i>Bos grunniens</i>                       | yak                       | NA          | No                     | Yes  | No     | No                | No         | No               | NA          | -0.2648             | NA             |
| <i>Bos indicus</i>                         | zebu cattle               | LC          | Yes                    | Yes  | Yes    | No                | No         | Yes              | No          | NA                  | No             |
| <i>Bos mutus</i>                           | wild yak                  | VU          | Yes                    | Yes  | Yes    | No                | Yes        | Yes              | No          | NA                  | No             |
| <i>Bos taurus</i>                          | cattle                    | LC          | Yes                    | Yes  | Yes    | No                | Yes        | Previous         | No          | 0.4181              | No             |
| <i>Bradypus variegatus</i>                 | brown-throated sloth      | LC          | No                     | No   | No     | No                | No         | Yes              | NA          | NA                  | NA             |
| <i>Bubalus bubalis</i>                     | water buffalo             | LC          | Yes                    | Yes  | Yes    | No                | Yes        | Yes              | No          | NA                  | No             |
| <i>Callithrix jacchus</i>                  | common marmoset           | LC          | Yes                    | Yes  | Yes    | Yes               | Yes        | Yes              | No          | 0.2425              | NA             |
| <i>Callithrix pygmaea</i>                  | pygmy marmoset            | NA          | No                     | Yes  | No     | No                | No         | No               | NA          | 0.3293              | NA             |
| <i>Callorhinus ursinus</i>                 | northern fur seal         | VU          | No                     | Yes  | No     | No                | No         | No               | NA          | -0.0993             | NA             |
| <i>Camelus bactrianus</i>                  | bactrian camel            | LC          | Yes                    | Yes  | Yes    | No                | Yes        | Yes              | NA          | -0.1819             | NA             |
| <i>Camelus dromedarius</i>                 | arabian camel             | LC          | Yes                    | Yes  | Yes    | No                | Yes        | Yes              | NA          | -0.0597             | NA             |
| <i>Camelus ferus</i>                       | wild bactrian camel       | CR          | Yes                    | Yes  | Yes    | No                | Yes        | Yes              | NA          | NA                  | No             |

| Species                             | Common Name                  | IUCN Status | Bio-diversity Analysis | TOGA | Cactus | Primate phastCons | Phylo geny | Repeat Annotated | Hiber nation | Brain Size Residual | Vocal Learning |
|-------------------------------------|------------------------------|-------------|------------------------|------|--------|-------------------|------------|------------------|--------------|---------------------|----------------|
| <i>Canis lupus dingo</i>            | dingo                        | LC          | No                     | Yes  | No     | No                | No         | No               | NA           | NA                  | NA             |
| <i>Canis lupus familiaris</i>       | domestic dog                 | LC          | Yes                    | Yes  | Yes    | No                | Yes        | Previous         | No           | 0.0043              | NA             |
| <i>Canis lupus familiaris</i>       | domestic dog                 | LC          | Yes                    | Yes  | Yes    | No                | Yes        | Yes              | No           | NA                  | NA             |
| <i>Capra aegagrus</i>               | wild goat                    | NT          | Yes                    | Yes  | Yes    | No                | Yes        | Yes              | No           | NA                  | No             |
| <i>Capra hircus</i>                 | goat                         | LC          | Yes                    | Yes  | Yes    | No                | Yes        | Yes              | No           | -0.0107             | NA             |
| <i>Capra ibex</i>                   | alpine ibex                  | LC          | No                     | Yes  | No     | No                | No         | No               | NA           | NA                  | NA             |
| <i>Capra sibirica</i>               | siberian ibex                | NT          | No                     | Yes  | No     | No                | No         | No               | NA           | NA                  | NA             |
| <i>Capreolus pygargus</i>           | siberian roe                 | LC          | No                     | Yes  | No     | No                | No         | No               | NA           | NA                  | NA             |
| <i>Capromys pilorides</i>           | desmarest's hutia            | LC          | Yes                    | No   | Yes    | No                | Yes        | Yes              | NA           | NA                  | NA             |
| <i>Carlito syrichta</i>             | philippine tarsier           | NT          | No                     | Yes  | No     | No                | No         | No               | No           | 0.2122              | NA             |
| <i>Carollia perspicillata</i>       | seba's short-tailed bat      | LC          | Yes                    | Yes  | Yes    | No                | Yes        | Yes              | NA           | 0.0422              | Yes            |
| <i>Castor canadensis</i>            | north american beaver        | LC          | Yes                    | Yes  | Yes    | No                | Yes        | Yes              | No           | -0.3538             | No             |
| <i>Catagonus wagneri</i>            | chacoan peccary              | EN          | Yes                    | Yes  | Yes    | No                | Yes        | Yes              | No           | NA                  | No             |
| <i>Cavia aperea</i>                 | brazilian guinea pig         | LC          | Yes                    | Yes  | Yes    | No                | No         | No               | No           | 0.0016              | No             |
| <i>Cavia porcellus</i>              | domestic guinea pig          | LC          | Yes                    | Yes  | Yes    | No                | Yes        | Yes              | No           | -0.0643             | No             |
| <i>Cavia tschudii</i>               | montane guinea pig           | LC          | Yes                    | Yes  | Yes    | No                | Yes        | Yes              | No           | NA                  | No             |
| <i>Cebus albifrons</i>              | white-fronted capuchin       | LC          | Yes                    | Yes  | Yes    | Yes               | Yes        | Yes              | No           | 0.6518              | No             |
| <i>Cebus capucinus imitator</i>     | white-faced sapajou          | VU          | Yes                    | Yes  | Yes    | Yes               | Yes        | No               | No           | 0.6135              | No             |
| <i>Cephalophus harveyi</i>          | harvey's red duiker          | LC          | No                     | Yes  | No     | No                | No         | No               | NA           | NA                  | NA             |
| <i>Cephalorhynchus commersonii</i>  | Commerson's dolphin          | NA          | No                     | Yes  | No     | No                | No         | No               | NA           | NA                  | NA             |
| <i>Ceratotherium simum cottoni</i>  | northern white rhinoceros    | CR          | Yes                    | Yes  | Yes    | No                | Yes        | Yes              | No           | NA                  | No             |
| <i>Ceratotherium simum simum</i>    | southern white rhinoceros    | NT          | Yes                    | Yes  | Yes    | No                | Yes        | Yes              | No           | -0.5415             | No             |
| <i>Cercocebus atys</i>              | sooty mangabey               | VU          | Yes                    | Yes  | Yes    | Yes               | Yes        | Yes              | No           | 0.3542              | No             |
| <i>Cercopithecus mona</i>           | mona monkey                  | NT          | No                     | Yes  | No     | No                | No         | No               | NA           | 0.4781              | NA             |
| <i>Cercopithecus neglectus</i>      | de brazza's monkey           | LC          | Yes                    | Yes  | Yes    | Yes               | No         | Yes              | No           | 0.3326              | No             |
| <i>Cervus elaphus hippelaphus</i>   | central european red deer    | LC          | No                     | Yes  | No     | No                | No         | No               | NA           | NA                  | NA             |
| <i>Cervus hanglu yarkandensis</i>   | yarkand deer                 | LC          | No                     | Yes  | No     | No                | No         | No               | NA           | NA                  | NA             |
| <i>Chaetophractus vellerosus</i>    | screaming hairy armadillo    | LC          | Yes                    | No   | Yes    | No                | No         | Yes              | No           | NA                  | NA             |
| <i>Cheirogaleus medius</i>          | fat-tailed dwarf lemur       | VU          | Yes                    | Yes  | Yes    | Yes               | Yes        | Yes              | Yes          | 0.0929              | No             |
| <i>Chinchilla lanigera</i>          | long-tailed chinchilla       | EN          | Yes                    | Yes  | Yes    | No                | Yes        | Yes              | NA           | 0.1646              | No             |
| <i>Chlorocebus sabaeus</i>          | green monkey                 | LC          | Yes                    | Yes  | Yes    | Yes               | Yes        | Yes              | No           | 0.3463              | No             |
| <i>Choloepus didactylus</i>         | linnaeus's two-toed sloth    | LC          | Yes                    | Yes  | Yes    | No                | No         | Yes              | NA           | -0.0686             | NA             |
| <i>Choloepus hoffmanni</i>          | hoffmann's two-toed sloth    | LC          | Yes                    | Yes  | Yes    | No                | Yes        | Yes              | NA           | -0.1275             | NA             |
| <i>Chrysochloris asiatica</i>       | cape golden mole             | LC          | Yes                    | Yes  | Yes    | No                | Yes        | Yes              | NA           | -0.1626             | NA             |
| <i>Chrysocyon brachyurus</i>        | maned wolf                   | NA          | No                     | Yes  | No     | No                | No         | No               | NA           | NA                  | NA             |
| <i>Coendou prehensilis</i>          | brazilian porcupine          | LC          | No                     | Yes  | No     | No                | No         | No               | NA           | -0.2491             | NA             |
| <i>Colobus angolensis palliatus</i> | angolan colobus              | VU          | Yes                    | Yes  | Yes    | Yes               | Yes        | Yes              | No           | 0.1425              | No             |
| <i>Condylura cristata</i>           | star-nosed mole              | LC          | Yes                    | Yes  | Yes    | No                | Yes        | Yes              | No           | 0.1225              | No             |
| <i>Connochaetes taurinus</i>        | blue wildebeest              | LC          | No                     | Yes  | No     | No                | No         | No               | NA           | -0.0888             | NA             |
| <i>Craseonycteris thonglongyai</i>  | bumblebee bat                | NT          | Yes                    | Yes  | Yes    | No                | Yes        | Yes              | NA           | -0.1067             | NA             |
| <i>Cricetomys gambianus</i>         | gambian pouched rat          | LC          | Yes                    | Yes  | Yes    | No                | Yes        | Yes              | NA           | -0.218              | No             |
| <i>Cricetulus griseus</i>           | chinese hamster              | LC          | Yes                    | Yes  | Yes    | No                | Yes        | Yes              | No           | NA                  | No             |
| <i>Crociodura indochinensis</i>     | indochinese shrew            | LC          | Yes                    | No   | Yes    | No                | No         | Yes              | Yes          | NA                  | NA             |
| <i>Crocuta crocuta</i>              | spotted hyena                | LC          | No                     | Yes  | No     | No                | No         | No               | NA           | -0.0933             | NA             |
| <i>Cryptoprocta ferox</i>           | fossa                        | VU          | Yes                    | Yes  | Yes    | No                | Yes        | Yes              | No           | -0.1067             | No             |
| <i>Ctenodactylus gundi</i>          | common gundi                 | LC          | Yes                    | Yes  | Yes    | No                | Yes        | Yes              | NA           | NA                  | No             |
| <i>Ctenomys sociabilis</i>          | social tuco-tuco             | CR          | Yes                    | Yes  | Yes    | No                | Yes        | Yes              | NA           | NA                  | No             |
| <i>Cuniculus paca</i>               | lowland paca                 | LC          | Yes                    | No   | Yes    | No                | Yes        | Yes              | NA           | NA                  | NA             |
| <i>Cynomys gunnisoni</i>            | gunnison's prairie dog       | LC          | No                     | Yes  | No     | No                | No         | No               | NA           | -0.1349             | NA             |
| <i>Cynopterus brachyotis</i>        | lesser short-nosed fruit bat | LC          | No                     | Yes  | No     | No                | No         | No               | NA           | 0.109               | NA             |
| <i>Damaliscus lunatus</i>           | common tsessebe              | LC          | No                     | Yes  | No     | No                | No         | No               | NA           | -0.0608             | NA             |
| <i>Dasyprocta punctata</i>          | central american agouti      | LC          | Yes                    | Yes  | Yes    | No                | Yes        | Yes              | NA           | -0.1026             | No             |



| Species                                     | Common Name                      | IUCN Status | Bio-diversity Analysis | TOGA | Cactus | Primate phastCons | Phylo geny | Repeat Annotated | Hiber nation | Brain Size Residual | Vocal Learning |
|---------------------------------------------|----------------------------------|-------------|------------------------|------|--------|-------------------|------------|------------------|--------------|---------------------|----------------|
| <i>Dasyopus novemcinctus</i>                | nine-banded armadillo            | LC          | Yes                    | Yes  | Yes    | No                | Yes        | Yes              | NA           | -0.3894             | NA             |
| <i>Daubentonia madagascariensis</i>         | aye-aye                          | EN          | Yes                    | Yes  | Yes    | Yes               | Yes        | Yes              | No           | 0.3292              | No             |
| <i>Delphinapterus leucas</i>                | beluga whale                     | LC          | Yes                    | Yes  | Yes    | No                | Yes        | Yes              | No           | 0.2704              | Yes            |
| <i>Desmodus rotundus</i>                    | common vampire bat               | LC          | Yes                    | Yes  | Yes    | No                | Yes        | Yes              | No           | 0.0804              | Yes            |
| <i>Dicerorhinus sumatrensis sumatrensis</i> | sumatran rhinoceros              | CR          | Yes                    | Yes  | Yes    | No                | Yes        | Yes              | No           | NA                  | No             |
| <i>Diceros bicornis</i>                     | black rhinoceros                 | CR          | Yes                    | Yes  | Yes    | No                | Yes        | Yes              | No           | -0.3368             | No             |
| <i>Dinomys branickii</i>                    | pacarana                         | LC          | Yes                    | Yes  | Yes    | No                | Yes        | Yes              | NA           | -0.4191             | No             |
| <i>Dipodomys ordii</i>                      | ord's kangaroo rat               | LC          | Yes                    | Yes  | Yes    | No                | Yes        | Yes              | NA           | 0.1039              | No             |
| <i>Dipodomys stephensi</i>                  | stephen's kangaroo rat           | VU          | Yes                    | Yes  | Yes    | No                | Yes        | Yes              | No           | NA                  | No             |
| <i>Dolichotis patagonum</i>                 | patagonian mara                  | NT          | Yes                    | Yes  | Yes    | No                | Yes        | Yes              | NA           | -0.1831             | No             |
| <i>Dugong dugon</i>                         | dugong                           | NA          | No                     | Yes  | No     | No                | No         | No               | NA           | NA                  | NA             |
| <i>Echinops telfairi</i>                    | lesser hedgehog tenrec           | LC          | Yes                    | Yes  | Yes    | No                | Yes        | Yes              | NA           | -0.4042             | NA             |
| <i>Eidolon dupreanum</i>                    | malagasy straw-colored fruit bat | VU          | No                     | Yes  | No     | No                | No         | No               | NA           | NA                  | NA             |
| <i>Eidolon helvum</i>                       | straw-colored fruit bat          | NT          | Yes                    | Yes  | Yes    | No                | Yes        | Yes              | No           | 0.087               | NA             |
| <i>Elaphurus davidianus</i>                 | pere david's deer                | CR          | Yes                    | Yes  | Yes    | No                | Yes        | Yes              | No           | NA                  | No             |
| <i>Elephantulus edwardii</i>                | cape elephant shrew              | LC          | Yes                    | Yes  | Yes    | No                | Yes        | Yes              | NA           | NA                  | NA             |
| <i>Elephas maximus</i>                      | asian elephant                   | EN          | No                     | Yes  | No     | No                | No         | No               | NA           | 0.1455              | NA             |
| <i>Ellobius lutescens</i>                   | transcaucasian mole vole         | LC          | Yes                    | Yes  | Yes    | No                | Yes        | Yes              | NA           | NA                  | No             |
| <i>Ellobius talpinus</i>                    | northern mole vole               | LC          | Yes                    | Yes  | Yes    | No                | Yes        | Yes              | Yes          | NA                  | No             |
| <i>Enhydra lutris kenyonii</i>              | sea otter                        | EN          | Yes                    | Yes  | Yes    | No                | Yes        | Yes              | No           | 0.0558              | No             |
| <i>Enhydra lutris nereis</i>                | sea otter                        | EN          | No                     | Yes  | No     | No                | No         | No               | NA           | NA                  | No             |
| <i>Eonycteris spelaea</i>                   | lesser dawn bat                  | LC          | No                     | Yes  | No     | No                | No         | No               | NA           | 0.0559              | NA             |
| <i>Eptesicus fuscus</i>                     | big brown bat                    | LC          | Yes                    | Yes  | Yes    | No                | Yes        | Yes              | Yes          | -0.1967             | NA             |
| <i>Equus asinus asinus</i>                  | donkey                           | LC          | Yes                    | Yes  | Yes    | No                | Yes        | Yes              | No           | -0.1295             | NA             |
| <i>Equus burchellii boehmi</i>              | quagga                           | NA          | No                     | Yes  | No     | No                | No         | No               | NA           | -0.0572             | NA             |
| <i>Equus burchellii quagga</i>              | quagga                           | NA          | No                     | Yes  | No     | No                | No         | No               | NA           | NA                  | NA             |
| <i>Equus caballus</i>                       | horse                            | LC          | Yes                    | Yes  | Yes    | No                | Yes        | Previous         | No           | -0.0486             | NA             |
| <i>Equus przewalskii</i>                    | przewalski's horse               | EN          | Yes                    | Yes  | Yes    | No                | Yes        | Yes              | No           | NA                  | No             |
| <i>Equus zebra</i>                          | mountain zebra                   | NA          | No                     | Yes  | No     | No                | No         | No               | NA           | NA                  | NA             |
| <i>Erethizon dorsatum</i>                   | north american porcupine         | LC          | No                     | Yes  | No     | No                | No         | No               | NA           | -0.1482             | NA             |
| <i>Erignathus barbatus</i>                  | bearded seal                     | LC          | No                     | Yes  | No     | No                | No         | No               | NA           | -0.1638             | NA             |
| <i>Erinaceus europaeus</i>                  | western european hedgehog        | LC          | Yes                    | Yes  | Yes    | No                | Yes        | Yes              | NA           | -0.3186             | No             |
| <i>Erythrocebus patas</i>                   | patas monkey                     | NT          | Yes                    | Yes  | Yes    | Yes               | Yes        | Yes              | No           | 0.36                | No             |
| <i>Eschrichtius robustus</i>                | grey whale                       | LC          | Yes                    | Yes  | Yes    | No                | Yes        | Yes              | No           | -0.7128             | NA             |
| <i>Eubalaena australis</i>                  | Southern right whale             | NA          | No                     | Yes  | No     | No                | No         | No               | NA           | NA                  | NA             |
| <i>Eubalaena glacialis</i>                  | north atlantic right whale       | CR          | No                     | Yes  | No     | No                | No         | No               | NA           | NA                  | NA             |
| <i>Eubalaena japonica</i>                   | north pacific right whale        | EN          | Yes                    | Yes  | Yes    | No                | Yes        | Yes              | No           | NA                  | Yes            |
| <i>Eudorcas thomsonii</i>                   | thomson's gazelle                | LC          | No                     | Yes  | No     | No                | No         | No               | NA           | -0.0674             | NA             |
| <i>Eulemur flavifrons</i>                   | sclater's lemur                  | CR          | Yes                    | Yes  | Yes    | Yes               | Yes        | Yes              | No           | NA                  | No             |
| <i>Eulemur fulvus</i>                       | common brown lemur               | VU          | Yes                    | Yes  | Yes    | Yes               | Yes        | Yes              | No           | 0.1514              | No             |
| <i>Eulemur macaco</i>                       | black lemur                      | EN          | No                     | Yes  | No     | No                | No         | No               | NA           | 0.1245              | NA             |
| <i>Eulemur mongoz</i>                       | mongoose lemur                   | CR          | No                     | Yes  | No     | No                | No         | No               | NA           | 0.246               | NA             |
| <i>Eumetopias jubatus</i>                   | steller sea lion                 | NT          | No                     | Yes  | No     | No                | No         | No               | NA           | -0.2762             | NA             |
| <i>Felis catus</i>                          | domestic cat                     | LC          | Yes                    | Yes  | Yes    | No                | Yes        | Previous         | No           | 0.0293              | NA             |
| <i>Felis nigripes</i>                       | black-footed cat                 | VU          | Yes                    | Yes  | Yes    | No                | No         | Yes              | No           | 0.2821              | No             |
| <i>Fukomys damarensis</i>                   | damara mole-rat                  | LC          | Yes                    | Yes  | Yes    | No                | Yes        | Yes              | NA           | NA                  | No             |
| <i>Galeopterus variegatus</i>               | sunda flying lemur               | LC          | Yes                    | Yes  | Yes    | No                | Yes        | Yes              | No           | NA                  | NA             |
| <i>Gallus gallus</i>                        | red junglefowl                   | NA          | No                     | No   | No     | No                | No         | No               | NA           | NA                  | NA             |
| <i>Giraffa camelopardalis</i>               | giraffe                          | VU          | No                     | Yes  | No     | No                | No         | No               | NA           | -0.4568             | NA             |
| <i>Giraffa tippelskirchi</i>                | giraffe                          | VU          | Yes                    | Yes  | Yes    | No                | Yes        | Yes              | No           | NA                  | No             |
| <i>Glis glis</i>                            | edible dormouse                  | LC          | Yes                    | Yes  | Yes    | No                | Yes        | Yes              | NA           | -0.089              | No             |
| <i>Globicephala melas</i>                   | long-finned pilot whale          | LC          | No                     | Yes  | No     | No                | No         | No               | NA           | 0.1676              | NA             |

| Species                           | Common Name                    | IUCN Status | Bio-diversity Analysis | TOGA | Cactus | Primate phastCons | Phylo geny | Repeat Annotated | Hiber nation | Brain Size Residual | Vocal Learning |
|-----------------------------------|--------------------------------|-------------|------------------------|------|--------|-------------------|------------|------------------|--------------|---------------------|----------------|
| <i>Gorilla gorilla gorilla</i>    | western lowland gorilla        | CR          | Yes                    | Yes  | Yes    | Yes               | Yes        | Previous         | No           | 0.1055              | No             |
| <i>Grammomys surdaster</i>        | common grammomys               | NA          | No                     | Yes  | No     | No                | No         | No               | NA           | NA                  | NA             |
| <i>Grampus griseus</i>            | Risso's dolphin                | NA          | No                     | Yes  | No     | No                | No         | No               | NA           | NA                  | NA             |
| <i>Graphiurus murinus</i>         | woodland doormouse             | LC          | Yes                    | Yes  | Yes    | No                | Yes        | Yes              | NA           | NA                  | No             |
| <i>Gulo gulo</i>                  | wolverine                      | LC          | No                     | Yes  | No     | No                | No         | No               | NA           | 0.1013              | NA             |
| <i>Halichoerus grypus</i>         | gray seal                      | LC          | No                     | Yes  | No     | No                | No         | No               | NA           | -0.2181             | NA             |
| <i>Helarctos malayanus</i>        | Malayan sun bear               | NA          | No                     | Yes  | No     | No                | No         | No               | NA           | NA                  | NA             |
| <i>Helogale parvula</i>           | dwarf mongoose                 | LC          | Yes                    | Yes  | Yes    | No                | Yes        | Yes              | No           | 0.1213              | No             |
| <i>Hemitragus hylacrius</i>       | nilgiri tahr                   | EN          | Yes                    | Yes  | Yes    | No                | Yes        | Yes              | No           | NA                  | No             |
| <i>Heterocephalus glaber</i>      | naked mole-rat                 | LC          | Yes                    | Yes  | Yes    | No                | Yes        | Yes              | NA           | -0.362              | NA             |
| <i>Heterohyrax brucei</i>         | yellow- spotted rock hyrax     | LC          | Yes                    | Yes  | Yes    | No                | Yes        | Yes              | NA           | -0.2155             | NA             |
| <i>Hippopotamus amphibius</i>     | hippopotamus                   | VU          | Yes                    | Yes  | Yes    | No                | Yes        | Yes              | No           | -0.4807             | NA             |
| <i>Hipposideros armiger</i>       | great roundleaf bat            | LC          | Yes                    | Yes  | Yes    | No                | Yes        | Yes              | Yes          | -0.1481             | Yes            |
| <i>Hipposideros galeritus</i>     | cantor's leaf-nosed bat        | LC          | Yes                    | Yes  | Yes    | No                | Yes        | Yes              | NA           | -0.0572             | Yes            |
| <i>Hippotragus equinus</i>        | roan antelope                  | NA          | No                     | Yes  | No     | No                | No         | No               | NA           | NA                  | NA             |
| <i>Hippotragus niger niger</i>    | sable antelope                 | LC          | No                     | Yes  | No     | No                | No         | No               | NA           | -0.2029             | NA             |
| <i>Homo sapiens</i>               | human                          | LC          | Yes                    | Yes  | Yes    | Yes               | Yes        | Previous         | No           | 0.7466              | Yes            |
| <i>Hyaena hyaena</i>              | striped hyena                  | NT          | Yes                    | Yes  | Yes    | No                | Yes        | Yes              | No           | -0.171              | No             |
| <i>Hydrochoerus hydrochaeris</i>  | capybara                       | LC          | Yes                    | Yes  | Yes    | No                | Yes        | Yes              | NA           | NA                  | No             |
| <i>Hydrodamalis gigas</i>         | Steller's sea cow              | NA          | No                     | Yes  | No     | No                | No         | No               | NA           | NA                  | NA             |
| <i>Hydropotes inermis</i>         | chinese water deer             | VU          | No                     | Yes  | No     | No                | No         | No               | NA           | -0.0639             | NA             |
| <i>Hylobates moloch</i>           | silvery javan gibbon           | EN          | No                     | Yes  | No     | No                | No         | No               | NA           | 0.4093              | NA             |
| <i>Hystrix cristata</i>           | crested porcupine              | LC          | Yes                    | Yes  | Yes    | No                | Yes        | Yes              | NA           | -0.3616             | No             |
| <i>Ictidomys tridecemlineatus</i> | thirteen-lined ground squirrel | LC          | Yes                    | Yes  | Yes    | No                | Yes        | Yes              | Yes          | NA                  | No             |
| <i>Indri indri</i>                | indri                          | CR          | Yes                    | Yes  | Yes    | Yes               | Yes        | Yes              | No           | -0.0038             | NA             |
| <i>Inia geoffrensis</i>           | amazon river dolphin           | EN          | Yes                    | Yes  | Yes    | No                | Yes        | Yes              | No           | 0.3389              | Yes            |
| <i>Jaculus jaculus</i>            | lesser egyptian jerboa         | LC          | Yes                    | Yes  | Yes    | No                | Yes        | No               | NA           | 0.089               | No             |
| <i>Kobus ellipsiprymnus</i>       | waterbuck                      | LC          | No                     | Yes  | No     | No                | No         | No               | NA           | -0.2336             | NA             |
| <i>Kobus leche leche</i>          | lechwe                         | NT          | No                     | Yes  | No     | No                | No         | No               | NA           | -0.2098             | NA             |
| <i>Kogia breviceps</i>            | pygmy sperm whale              | LC          | Yes                    | Yes  | Yes    | No                | Yes        | Yes              | No           | 0.1253              | NA             |
| <i>Lagenorhynchus obliquidens</i> | pacific white-sided dolphin    | LC          | No                     | Yes  | No     | No                | No         | No               | NA           | 0.6008              | NA             |
| <i>Lama glama chaku</i>           | guanaco                        | NA          | No                     | Yes  | No     | No                | No         | No               | NA           | NA                  | NA             |
| <i>Lama guanicoe cacsilensis</i>  | guanaco                        | LC          | No                     | Yes  | No     | No                | No         | No               | NA           | NA                  | NA             |
| <i>Lasiurus borealis</i>          | eastern red bat                | LC          | Yes                    | Yes  | Yes    | No                | Yes        | Yes              | Yes          | -0.1744             | NA             |
| <i>Lemur catta</i>                | ring tailed lemur              | EN          | Yes                    | Yes  | Yes    | Yes               | Yes        | Yes              | No           | 0.1049              | No             |
| <i>Leptonychotes weddellii</i>    | weddell seal                   | LC          | Yes                    | Yes  | Yes    | No                | Yes        | Yes              | No           | -0.1723             | Yes            |
| <i>Leptonycteris yerbabuena</i>   | lesser long-nosed bat          | NT          | No                     | Yes  | No     | No                | No         | No               | NA           | NA                  | NA             |
| <i>Lepus americanus</i>           | snowshoe hare                  | LC          | Yes                    | Yes  | Yes    | No                | Yes        | Yes              | No           | -0.1344             | No             |
| <i>Lepus timidus</i>              | mountain hare                  | LC          | No                     | Yes  | No     | No                | No         | No               | NA           | -0.1974             | NA             |
| <i>Lipotes vexillifer</i>         | yangtze river dolphin          | CR          | Yes                    | Yes  | Yes    | No                | Yes        | Yes              | No           | 0.0651              | NA             |
| <i>Litocranius walleri</i>        | gerenuk                        | NT          | No                     | Yes  | No     | No                | No         | No               | NA           | -0.1195             | NA             |
| <i>Lontra canadensis</i>          | north american river otter     | LC          | No                     | Yes  | No     | No                | No         | No               | NA           | 0.0421              | NA             |
| <i>Loxodonta africana</i>         | african savanna elephant       | EN          | Yes                    | Yes  | Yes    | No                | Yes        | Yes              | No           | 0.02                | NA             |
| <i>Lutra lutra</i>                | european otter                 | NT          | No                     | Yes  | No     | No                | No         | No               | NA           | -0.021              | NA             |
| <i>Lycaon pictus</i>              | african hunting dog            | EN          | Yes                    | Yes  | Yes    | No                | Yes        | Yes              | No           | 0.113               | No             |
| <i>Lynx canadensis</i>            | canadian lynx                  | LC          | No                     | Yes  | No     | No                | No         | No               | NA           | -0.0295             | NA             |
| <i>Lynx pardinus</i>              | iberian lynx                   | EN          | No                     | Yes  | No     | No                | No         | No               | NA           | NA                  | NA             |
| <i>Macaca fascicularis</i>        | crab-eating macaque            | VU          | Yes                    | Yes  | Yes    | Yes               | Yes        | Yes              | No           | 0.4661              | No             |
| <i>Macaca fuscata</i>             | japanese macaque               | LC          | No                     | Yes  | No     | No                | No         | No               | NA           | 0.3173              | NA             |
| <i>Macaca mulatta</i>             | rhesus monkey                  | LC          | Yes                    | Yes  | Yes    | Yes               | Yes        | Yes              | No           | 0.4564              | No             |
| <i>Macaca nemestrina</i>          | southern pig-tailed macaque    | VU          | Yes                    | Yes  | Yes    | Yes               | Yes        | Yes              | No           | 0.5646              | No             |
| <i>Macroglossus sobrinus</i>      | long-tongued fruit bat         | LC          | Yes                    | Yes  | Yes    | No                | Yes        | Yes              | NA           | 0.0977              | NA             |

| Species                         | Common Name                   | IUCN Status | Bio-diversity Analysis | TOGA | Cactus | Primate phastCons | Phylo geny | Repeat Annotated | Hiber nation | Brain Size Residual | Vocal Learning |
|---------------------------------|-------------------------------|-------------|------------------------|------|--------|-------------------|------------|------------------|--------------|---------------------|----------------|
| <i>Macrotus californicus</i>    | california leaf-nosed bat     | LC          | No                     | Yes  | No     | No                | No         | No               | NA           | 0.0156              | NA             |
| <i>Madoqua kirkii</i>           | kirk's dikdik                 | LC          | No                     | Yes  | No     | No                | No         | No               | NA           | 0.0832              | NA             |
| <i>Mandrillus leucophaeus</i>   | drill                         | EN          | Yes                    | Yes  | Yes    | Yes               | Yes        | Yes              | No           | 0.2981              | No             |
| <i>Mandrillus sphinx</i>        | mandrill                      | VU          | No                     | Yes  | No     | No                | No         | No               | NA           | 0.4164              | NA             |
| <i>Manis javanica</i>           | malayan pangolin              | CR          | Yes                    | Yes  | Yes    | No                | Yes        | No               | NA           | -0.3872             | No             |
| <i>Manis pentadactyla</i>       | chinese pangolin              | CR          | Yes                    | Yes  | Yes    | No                | Yes        | Yes              | NA           | -0.2459             | No             |
| <i>Manis tricuspis</i>          | tree pangolin                 | NA          | No                     | Yes  | No     | No                | No         | No               | NA           | -0.2066             | NA             |
| <i>Marmota flaviventris</i>     | yellow-bellied marmot         | LC          | No                     | Yes  | No     | No                | No         | No               | NA           | -0.295              | NA             |
| <i>Marmota himalayana</i>       | himalayan marmot              | LC          | No                     | Yes  | No     | No                | No         | No               | NA           | -0.3821             | NA             |
| <i>Marmota marmota marmota</i>  | alpine marmot                 | LC          | Yes                    | Yes  | Yes    | No                | Yes        | Yes              | Yes          | -0.2722             | No             |
| <i>Marmota monax</i>            | woodchuck                     | LC          | No                     | Yes  | No     | No                | No         | No               | NA           | -0.1741             | NA             |
| <i>Marmota vancouverensis</i>   | vancouver island marmot       | CR          | No                     | Yes  | No     | No                | No         | No               | NA           | -0.3253             | NA             |
| <i>Martes zibellina</i>         | sable                         | LC          | No                     | Yes  | No     | No                | No         | No               | NA           | 0.2373              | NA             |
| <i>Mastacomys fuscus</i>        | broad-toothed mouse           | NA          | No                     | Yes  | No     | No                | No         | No               | NA           | NA                  | NA             |
| <i>Mastomys coucha</i>          | southern african mastomys     | LC          | No                     | Yes  | No     | No                | No         | No               | NA           | NA                  | NA             |
| <i>Megaderma lyra</i>           | greater false vampire bat     | LC          | Yes                    | Yes  | Yes    | No                | Yes        | Yes              | No           | 0.0502              | Yes            |
| <i>Megaptera novaeangliae</i>   | humpback whale                | LC          | No                     | Yes  | No     | No                | No         | No               | NA           | -0.5631             | NA             |
| <i>Mellivora capensis</i>       | honey badger                  | LC          | Yes                    | Yes  | Yes    | No                | Yes        | Yes              | No           | 0.1925              | No             |
| <i>Meriones unguiculatus</i>    | mongolian jird                | LC          | Yes                    | Yes  | Yes    | No                | No         | Yes              | NA           | -0.0061             | No             |
| <i>Mesocricetus auratus</i>     | golden hamster                | VU          | Yes                    | Yes  | Yes    | No                | Yes        | Yes              | NA           | -0.2994             | No             |
| <i>Mesoplodon bidens</i>        | sowerby's beaked whale        | LC          | Yes                    | Yes  | Yes    | No                | Yes        | Yes              | No           | NA                  | NA             |
| <i>Mesoplodon densirostris</i>  | Blainville's beaked whale     | NA          | No                     | Yes  | No     | No                | No         | No               | NA           | NA                  | NA             |
| <i>Mesoplodon europaeus</i>     | Gervais' beaked whale         | NA          | No                     | Yes  | No     | No                | No         | No               | NA           | NA                  | NA             |
| <i>Mesoplodon stejnegeri</i>    | Stejneger's beaked whale      | NA          | No                     | Yes  | No     | No                | No         | No               | NA           | NA                  | NA             |
| <i>Microcebus murinus</i>       | gray mouse lemur              | LC          | Yes                    | Yes  | Yes    | Yes               | Yes        | Yes              | Yes          | 0.2022              | No             |
| <i>Microcebus sp. 3 GT-2019</i> | mouse lemur                   | NA          | No                     | Yes  | No     | No                | No         | No               | NA           | NA                  | NA             |
| <i>Microcebus tavaratra</i>     | northern rufous mouse lemur   | VU          | No                     | Yes  | No     | Yes               | Yes        | Yes              | NA           | NA                  | NA             |
| <i>Microgale talazaci</i>       | talazac's shrew tenrec        | LC          | Yes                    | Yes  | Yes    | No                | No         | No               | NA           | -0.1192             | NA             |
| <i>Micronycteris hirsuta</i>    | hairy big-eared bat           | LC          | Yes                    | Yes  | Yes    | No                | Yes        | Yes              | NA           | NA                  | NA             |
| <i>Microtus agrestis</i>        | field vole                    | LC          | No                     | Yes  | No     | No                | No         | No               | NA           | -0.0037             | NA             |
| <i>Microtus arvalis</i>         | common vole                   | LC          | No                     | Yes  | No     | No                | No         | No               | NA           | -0.1118             | NA             |
| <i>Microtus fortis</i>          | reed vole                     | NA          | No                     | Yes  | No     | No                | No         | No               | NA           | NA                  | NA             |
| <i>Microtus ochrogaster</i>     | prairie vole                  | LC          | Yes                    | Yes  | Yes    | No                | Yes        | Yes              | No           | -0.1199             | No             |
| <i>Microtus oeconomus</i>       | root vole                     | LC          | No                     | Yes  | No     | No                | No         | No               | NA           | NA                  | NA             |
| <i>Miniopterus natalensis</i>   | atal long-fingered bat        | LC          | Yes                    | Yes  | Yes    | No                | Yes        | Yes              | Yes          | NA                  | NA             |
| <i>Miniopterus schreibersii</i> | common bent-wing bat          | VU          | Yes                    | Yes  | Yes    | No                | Yes        | Yes              | Yes          | -0.1115             | NA             |
| <i>Mirounga angustirostris</i>  | northern elephant seal        | LC          | Yes                    | Yes  | Yes    | No                | Yes        | Yes              | No           | -0.2978             | Yes            |
| <i>Mirounga leonina</i>         | southern elephant seal        | LC          | No                     | Yes  | No     | No                | No         | No               | NA           | -0.3859             | NA             |
| <i>Mirza coquereli</i>          | coquerel's giant mouse lemur  | EN          | Yes                    | Yes  | Yes    | Yes               | Yes        | Yes              | NA           | 0.153               | No             |
| <i>Mirza zaza</i>               | coquerel's giant mouse lemur  | VU          | No                     | Yes  | No     | No                | No         | No               | NA           | NA                  | NA             |
| <i>Molossus molossus</i>        | pallas's mastiff bat          | LC          | No                     | Yes  | No     | No                | No         | Previous         | NA           | -0.1269             | NA             |
| <i>Monodelphis domestica</i>    | gray short-tailed opossum     | LC          | No                     | No   | No     | No                | No         | No               | NA           | NA                  | NA             |
| <i>Monodon monoceros</i>        | narwhal                       | LC          | Yes                    | Yes  | Yes    | No                | Yes        | Yes              | No           | 0.0875              | NA             |
| <i>Mormoops blainvillei</i>     | ghost-faced bat               | LC          | Yes                    | Yes  | Yes    | No                | Yes        | Yes              | No           | NA                  | NA             |
| <i>Moschus berezovskii</i>      | forest musk deer              | EN          | No                     | Yes  | No     | No                | No         | No               | NA           | NA                  | NA             |
| <i>Moschus chrysogaster</i>     | alpine musk deer              | EN          | No                     | Yes  | No     | No                | No         | No               | NA           | NA                  | NA             |
| <i>Moschus moschiferus</i>      | siberian musk deer            | VU          | Yes                    | Yes  | Yes    | No                | Yes        | Yes              | No           | NA                  | No             |
| <i>Mungos mungo</i>             | south african banded mongoose | LC          | Yes                    | Yes  | Yes    | No                | Yes        | Yes              | No           | 0.0803              | No             |
| <i>Muntiacus crinifrons</i>     | black muntjac                 | VU          | No                     | Yes  | No     | No                | No         | No               | NA           | NA                  | NA             |
| <i>Muntiacus muntjak</i>        | red muntjac                   | LC          | No                     | Yes  | No     | No                | No         | No               | NA           | 0.19                | NA             |
| <i>Muntiacus reevesi</i>        | reeves' muntjac               | LC          | No                     | Yes  | No     | No                | No         | No               | NA           | NA                  | NA             |
| <i>Murina aurata feae</i>       | ashy-gray tube-nosed bat      | LC          | Yes                    | Yes  | Yes    | No                | Yes        | Yes              | NA           | NA                  | Yes            |

| Species                                            | Common Name                            | IUCN Status | Bio-diversity Analysis | TOGA | Cactus | Primate phastCons | Phylo geny | Repeat Annotated | Hibernation | Brain Size Residual | Vocal Learning |
|----------------------------------------------------|----------------------------------------|-------------|------------------------|------|--------|-------------------|------------|------------------|-------------|---------------------|----------------|
| <i>Mus caroli</i>                                  | ryukyu mouse                           | LC          | Yes                    | Yes  | Yes    | No                | Yes        | Yes              | NA          | NA                  | No             |
| <i>Mus musculus</i>                                | house mouse                            | LC          | Yes                    | Yes  | Yes    | No                | Yes        | Previous         | NA          | -0.0222             | No             |
| <i>Mus pahari</i>                                  | shrew mouse                            | LC          | Yes                    | Yes  | Yes    | No                | Yes        | Yes              | NA          | NA                  | No             |
| <i>Mus spicilegus</i>                              | mound-building mouse                   | LC          | No                     | Yes  | No     | No                | No         | No               | NA          | NA                  | NA             |
| <i>Mus spretus</i>                                 | western mediterranean mouse            | LC          | Yes                    | Yes  | Yes    | No                | Yes        | Yes              | NA          | NA                  | No             |
| <i>Muscardinus avellanarius</i>                    | hazel dormouse                         | LC          | Yes                    | Yes  | Yes    | No                | Yes        | Yes              | NA          | NA                  | No             |
| <i>Mustela erminea</i>                             | ermine                                 | LC          | No                     | Yes  | No     | No                | No         | No               | NA          | 0.2741              | NA             |
| <i>Mustela putorius putorius</i>                   | domestic ferret                        | LC          | Yes                    | Yes  | No     | No                | No         | No               | No          | -0.0651             | NA             |
| <i>Mustela putorius furo</i>                       | domestic ferret                        | LC          | No                     | Yes  | Yes    | No                | Yes        | Yes              | NA          | NA                  | NA             |
| <i>Myocastor coypus</i>                            | coypu                                  | LC          | Yes                    | Yes  | Yes    | No                | Yes        | Yes              | No          | -0.3935             | No             |
| <i>Myodes glareolus</i>                            | bank vole                              | LC          | No                     | Yes  | No     | No                | No         | No               | NA          | 0.0363              | NA             |
| <i>Myotis brandtii</i>                             | brandt's bat                           | LC          | Yes                    | Yes  | Yes    | No                | Yes        | Previous         | Yes         | NA                  | Yes            |
| <i>Myotis davidii</i>                              | david's myotis                         | LC          | Yes                    | Yes  | Yes    | No                | Yes        | Yes              | Yes         | NA                  | NA             |
| <i>Myotis lucifugus</i>                            | little brown bat                       | LC          | Yes                    | Yes  | Yes    | No                | Yes        | Yes              | Yes         | -0.2096             | NA             |
| <i>Myotis myotis</i>                               | greater mouse-eared bat                | LC          | Yes                    | Yes  | Yes    | No                | Yes        | Previous         | Yes         | -0.1352             | Yes            |
| <i>Myotis septentrionalis</i>                      | northern myotis                        | NT          | No                     | Yes  | No     | No                | No         | No               | NA          | NA                  | NA             |
| <i>Myrmecophaga tridactyla</i>                     | giant anteater                         | VU          | Yes                    | Yes  | Yes    | No                | Yes        | Yes              | NA          | -0.0238             | NA             |
| <i>Nanger granti</i>                               | grant's gazelle                        | LC          | No                     | Yes  | No     | No                | No         | No               | NA          | -0.0526             | NA             |
| <i>Nannospalax galili</i>                          | upper galilee mountains blind mole rat | DD          | Yes                    | Yes  | Yes    | No                | Yes        | Yes              | NA          | NA                  | No             |
| <i>Nasalis larvatus</i>                            | proboscis monkey                       | EN          | Yes                    | Yes  | Yes    | Yes               | Yes        | Yes              | No          | 0.1921              | No             |
| <i>Nasua narica</i>                                | white-nosed coati                      | LC          | No                     | Yes  | No     | No                | No         | No               | NA          | 0.0582              | NA             |
| <i>Neofelis nebulosa</i>                           | clouded leopard                        | VU          | No                     | Yes  | No     | No                | No         | No               | NA          | -0.1205             | NA             |
| <i>Neomonachus schauinslandi</i>                   | hawaiian monk seal                     | EN          | Yes                    | Yes  | Yes    | No                | Yes        | Yes              | No          | NA                  | NA             |
| <i>Neophocaena asiaeorientalis asiaeorientalis</i> | yangtze finless porpoise               | EN          | Yes                    | Yes  | Yes    | No                | Yes        | Yes              | No          | NA                  | NA             |
| <i>Neotoma lepida</i>                              | desert woodrat                         | LC          | No                     | Yes  | No     | No                | No         | No               | NA          | NA                  | NA             |
| <i>Neotragus moschatus</i>                         | suni                                   | LC          | No                     | Yes  | No     | No                | No         | No               | NA          | 0.1312              | NA             |
| <i>Neotragus pygmaeus</i>                          | royal antelope                         | LC          | No                     | Yes  | No     | No                | No         | No               | NA          | NA                  | NA             |
| <i>Neovison vison</i>                              | american mink                          | LC          | No                     | Yes  | No     | No                | No         | No               | NA          | -0.0021             | NA             |
| <i>Noctilio leporinus</i>                          | greater bulldog bat                    | LC          | Yes                    | Yes  | Yes    | No                | Yes        | Yes              | No          | 0.0043              | NA             |
| <i>Nomascus leucogenys</i>                         | northern white-cheeked gibbon          | CR          | Yes                    | Yes  | Yes    | Yes               | Yes        | Yes              | No          | NA                  | No             |
| <i>Nycticebus coucang</i>                          | sunda slow loris                       | EN          | Yes                    | Yes  | Yes    | Yes               | Yes        | Yes              | NA          | 0.2527              | No             |
| <i>Nycticeius humeralis</i>                        | egyptian slit-faced bat                | LC          | No                     | Yes  | No     | No                | No         | No               | NA          | NA                  | NA             |
| <i>Ochotona princeps</i>                           | american pika                          | LC          | Yes                    | Yes  | Yes    | No                | Yes        | Yes              | No          | -0.0326             | No             |
| <i>Octodon degus</i>                               | degu                                   | LC          | Yes                    | Yes  | Yes    | No                | Yes        | Yes              | No          | -0.1595             | No             |
| <i>Odobenus rosmarus rosmarus</i>                  | pacific walrus                         | VU          | No                     | Yes  | No     | No                | No         | No               | No          | -0.0979             | Yes            |
| <i>Odobenus rosmarus divergens</i>                 | pacific walrus                         | VU          | Yes                    | Yes  | Yes    | No                | Yes        | Yes              | NA          | NA                  | Yes            |
| <i>Odocoileus hemionus hemionus</i>                | mule deer                              | LC          | No                     | Yes  | No     | No                | No         | No               | NA          | -0.041              | NA             |
| <i>Odocoileus virginianus virginianus</i>          | white-tailed deer                      | LC          | Yes                    | Yes  | No     | No                | No         | No               | No          | -0.028              | No             |
| <i>Odocoileus virginianus texanus</i>              | white-tailed deer                      | LC          | No                     | Yes  | Yes    | No                | Yes        | No               | NA          | NA                  | NA             |
| <i>Okapia johnstoni</i>                            | okapi                                  | EN          | Yes                    | Yes  | Yes    | No                | Yes        | Yes              | No          | -0.0754             | No             |
| <i>Ondatra zibethicus</i>                          | muskrat                                | LC          | Yes                    | Yes  | Yes    | No                | Yes        | Yes              | No          | -0.3301             | No             |
| <i>Onychomys torridus</i>                          | scorpion mouse                         | LC          | Yes                    | Yes  | Yes    | No                | Yes        | Yes              | No          | 0.0547              | No             |
| <i>Orcinus orca</i>                                | killer whale                           | DD          | Yes                    | Yes  | Yes    | No                | Yes        | Yes              | No          | 0.1556              | Yes            |
| <i>Oreamnos americanus</i>                         | mountain goat                          | LC          | No                     | Yes  | No     | No                | No         | No               | NA          | NA                  | NA             |
| <i>Oreotragus oreotragus</i>                       | klipspringer                           | LC          | No                     | Yes  | No     | No                | No         | No               | NA          | 0.0027              | NA             |
| <i>Ornithorhynchus anatinus</i>                    | platypus                               | NT          | No                     | No   | No     | No                | No         | No               | NA          | NA                  | NA             |
| <i>Orycteropus afer afer</i>                       | aardvark                               | LC          | Yes                    | Yes  | Yes    | No                | Yes        | Yes              | NA          | -0.3271             | NA             |
| <i>Oryctolagus cuniculus cuniculus</i>             | rabbit                                 | EN          | Yes                    | Yes  | Yes    | No                | Yes        | Yes              | No          | -0.1956             | No             |
| <i>Oryx dammah</i>                                 | scimitar-horned oryx                   | EW          | No                     | Yes  | No     | No                | No         | No               | NA          | NA                  | NA             |
| <i>Oryx gazella</i>                                | gemsbok                                | LC          | No                     | Yes  | No     | No                | No         | No               | NA          | -0.1878             | NA             |
| <i>Otlemur garnettii</i>                           | small-eared galago                     | LC          | Yes                    | Yes  | Yes    | Yes               | Yes        | Yes              | No          | 0.1582              | No             |

| Species                                    | Common Name               | IUCN Status | Bio-diversity Analysis | TOGA | Cactus | Primate phastCons | Phylo geny | Repeat Annotated | Hiber nation | Brain Size Residual | Vocal Learning |
|--------------------------------------------|---------------------------|-------------|------------------------|------|--------|-------------------|------------|------------------|--------------|---------------------|----------------|
| <i>Ovis ammon</i>                          | argali                    | NT          | No                     | Yes  | No     | No                | No         | No               | NA           | -0.1492             | NA             |
| <i>Ovis aries</i>                          | sheep                     | LC          | Yes                    | Yes  | Yes    | No                | Yes        | Yes              | No           | -0.0552             | No             |
| <i>Ovis canadensis canadensis</i>          | peninsular bighorn sheep  | EN          | Yes                    | Yes  | Yes    | No                | Yes        | Yes              | No           | NA                  | No             |
| <i>Ovis nivicola lydekkeri</i>             | snow sheep                | NA          | No                     | Yes  | No     | No                | No         | No               | NA           | NA                  | NA             |
| <i>Ovis orientalis</i>                     | mouflon                   | NA          | No                     | Yes  | No     | No                | No         | No               | NA           | NA                  | NA             |
| <i>Pachyuromys duprasi</i>                 | fat-tailed gerbil         | NA          | No                     | Yes  | No     | No                | No         | No               | NA           | NA                  | NA             |
| <i>Pan paniscus</i>                        | bonobo                    | EN          | Yes                    | Yes  | Yes    | Yes               | Yes        | Yes              | No           | 0.329               | NA             |
| <i>Pan troglodytes</i>                     | chimpanzee                | EN          | Yes                    | Yes  | Yes    | Yes               | Yes        | Yes              | No           | 0.224               | NA             |
| <i>Panthera leo</i>                        | lion                      | VU          | No                     | Yes  | No     | No                | No         | No               | NA           | -0.0191             | NA             |
| <i>Panthera onca</i>                       | jaguar                    | NT          | Yes                    | Yes  | Yes    | No                | Yes        | Yes              | No           | -0.2347             | No             |
| <i>Panthera pardus</i>                     | leopard                   | VU          | Yes                    | Yes  | Yes    | No                | Yes        | Yes              | No           | -0.1207             | No             |
| <i>Panthera tigris altaica</i>             | amur tiger                | EN          | Yes                    | Yes  | Yes    | No                | Yes        | Yes              | No           | -0.2767             | No             |
| <i>Panthera uncia</i>                      | snow leopard              | NA          | No                     | Yes  | No     | No                | No         | No               | NA           | NA                  | NA             |
| <i>Pantholops hodgsonii</i>                | chiru                     | NT          | Yes                    | Yes  | Yes    | No                | Yes        | Yes              | No           | NA                  | No             |
| <i>Papio anubis</i>                        | olive baboon              | LC          | Yes                    | Yes  | Yes    | Yes               | Yes        | Yes              | No           | 0.35                | No             |
| <i>Paradoxurus hermaphroditus</i>          | asian palm civet          | LC          | Yes                    | Yes  | Yes    | No                | Yes        | Yes              | No           | 0.0918              | No             |
| <i>Pedetes capensis</i>                    | south african springhare  | LC          | No                     | Yes  | No     | No                | No         | No               | NA           | NA                  | NA             |
| <i>Peponocephala electra</i>               | melon-headed whale        | LC          | No                     | Yes  | No     | No                | No         | No               | NA           | NA                  | NA             |
| <i>Perognathus longimembris pacificus</i>  | pacific pocket mouse      | EN          | Yes                    | Yes  | Yes    | No                | Yes        | Yes              | NA           | 0.0951              | No             |
| <i>Peromyscus californicus insignis</i>    | california leaf-nosed bat | LC          | No                     | Yes  | No     | No                | No         | No               | NA           | -0.0101             | NA             |
| <i>Peromyscus crinitus</i>                 | canyon deer mouse         | LC          | No                     | Yes  | No     | No                | No         | No               | NA           | 0.135               | NA             |
| <i>Peromyscus eremicus</i>                 | cactus deer mouse         | LC          | No                     | Yes  | No     | No                | No         | No               | NA           | 0.0177              | NA             |
| <i>Peromyscus leucopus</i>                 | white-footed deer mouse   | LC          | No                     | Yes  | No     | No                | No         | No               | NA           | 0.0432              | NA             |
| <i>Peromyscus maniculatus bairdii</i>      | prairie deer mouse        | LC          | Yes                    | Yes  | Yes    | No                | Yes        | Yes              | NA           | 0.0142              | No             |
| <i>Peromyscus nasutus</i>                  | northern rock deer mouse  | LC          | No                     | Yes  | No     | No                | No         | No               | NA           | NA                  | NA             |
| <i>Peromyscus polionotus subgriseus</i>    | oldfield deer mouse       | LC          | No                     | Yes  | No     | No                | No         | No               | NA           | 0.0398              | NA             |
| <i>Petromus typicus</i>                    | dassie rat                | LC          | Yes                    | Yes  | Yes    | No                | Yes        | Yes              | No           | NA                  | No             |
| <i>Phascolarctos cinereus</i>              | koala                     | VU          | No                     | No   | No     | No                | No         | No               | NA           | NA                  | NA             |
| <i>Phataginus tricuspis</i>                | tree pangolin             | EN          | No                     | Yes  | No     | No                | No         | No               | NA           | NA                  | NA             |
| <i>Philantomba maxwellii</i>               | maxwell's duiker          | LC          | No                     | Yes  | No     | No                | No         | No               | NA           | 0.1953              | NA             |
| <i>Phoca largha</i>                        | spotted seal              | NA          | No                     | Yes  | No     | No                | No         | No               | NA           | NA                  | NA             |
| <i>Phoca vitulina</i>                      | harbor seal               | LC          | No                     | Yes  | No     | No                | No         | No               | NA           | 0.1079              | NA             |
| <i>Phocoena phocoena</i>                   | harbor porpoise           | LC          | Yes                    | Yes  | Yes    | No                | Yes        | Yes              | No           | 0.634               | NA             |
| <i>Phocoena sinus</i>                      | vaquita                   | CR          | No                     | Yes  | No     | No                | No         | No               | NA           | NA                  | NA             |
| <i>Phyllostomus discolor</i>               | pale spear-nosed bat      | LC          | No                     | Yes  | No     | No                | No         | Previous         | NA           | 0.1418              | NA             |
| <i>Physeter catodon</i>                    | sperm whale               | NA          | No                     | Yes  | No     | No                | No         | No               | NA           | -0.507              | NA             |
| <i>Ptilocolobus tephrosceles</i>           | ugandan red colobus       | EN          | Yes                    | Yes  | Yes    | Yes               | Yes        | Yes              | No           | 0.1674              | No             |
| <i>Pipistrellus kuhlii</i>                 | kuhl's pipistrelle        | LC          | No                     | Yes  | No     | No                | No         | Previous         | NA           | -0.1194             | NA             |
| <i>Pipistrellus pipistrellus</i>           | common pipistrelle        | LC          | Yes                    | Yes  | Yes    | No                | No         | Yes              | Yes          | NA                  | Yes            |
| <i>Pithecia pithecia</i>                   | white-faced saki          | LC          | Yes                    | Yes  | Yes    | Yes               | Yes        | Yes              | No           | 0.3742              | No             |
| <i>Platanista minor</i>                    | indus river dolphin       | EN          | Yes                    | Yes  | Yes    | No                | Yes        | Yes              | NA           | NA                  | NA             |
| <i>Plecturocebus donacophilus</i>          | white-eared titi          | LC          | Yes                    | Yes  | Yes    | Yes               | Yes        | Yes              | NA           | NA                  | No             |
| <i>Pongo abelii</i>                        | sumatran orangutan        | CR          | Yes                    | Yes  | Yes    | Yes               | Yes        | Yes              | No           | 0.2519              | No             |
| <i>Pontoporia blainvillei</i>              | la plata dolphin          | VU          | No                     | No   | No     | No                | No         | Yes              | NA           | NA                  | NA             |
| <i>Potos flavus</i>                        | kinkajou                  | LC          | No                     | Yes  | No     | No                | No         | No               | NA           | 0.2666              | NA             |
| <i>Prionailurus bengalensis euptilurus</i> | leopard cat               | LC          | No                     | Yes  | No     | No                | No         | No               | NA           | NA                  | NA             |
| <i>Procapra przewalskii</i>                | przewalski's gazelle      | EN          | No                     | Yes  | No     | No                | No         | No               | NA           | NA                  | NA             |
| <i>Procavia capensis</i>                   | rock hyrax                | LC          | Yes                    | Yes  | Yes    | No                | Yes        | Yes              | No           | 0.025               | NA             |
| <i>Procyon lotor</i>                       | raccoon                   | LC          | No                     | Yes  | No     | No                | No         | No               | NA           | 0.1008              | NA             |
| <i>Prolemur simus</i>                      | greater bamboo lemur      | CR          | No                     | Yes  | No     | No                | No         | No               | NA           | 0.1943              | NA             |
| <i>Propithecus coquereli</i>               | coquerel's sifaka         | CR          | Yes                    | Yes  | Yes    | Yes               | Yes        | Yes              | No           | 0.0612              | No             |
| <i>Przewalskium albirostris</i>            | white-lipped deer         | NA          | No                     | Yes  | No     | No                | No         | No               | NA           | NA                  | NA             |

| Species                                | Common Name                     | IUCN Status | Bio-diversity Analysis | TOGA | Cactus | Primate phastCons | Phylo geny | Repeat Annotated | Hibernation | Brain Size Residual | Vocal Learning |
|----------------------------------------|---------------------------------|-------------|------------------------|------|--------|-------------------|------------|------------------|-------------|---------------------|----------------|
| <i>Psammomys obesus</i>                | fat sand rat                    | LC          | Yes                    | Yes  | Yes    | No                | No         | Yes              | NA          | -0.0057             | No             |
| <i>Pseudomys desertor</i>              | brown desert mouse              | NA          | No                     | Yes  | No     | No                | No         | No               | NA          | NA                  | NA             |
| <i>Pteronotus parnellii</i>            | parnell's mustached bat         | LC          | Yes                    | Yes  | Yes    | No                | Yes        | Yes              | No          | 0.0247              | Yes            |
| <i>Pteronura brasiliensis</i>          | giant otter                     | EN          | Yes                    | Yes  | Yes    | No                | Yes        | Yes              | No          | -0.0927             | No             |
| <i>Pteropus alecto</i>                 | black flying fox                | LC          | Yes                    | Yes  | Yes    | No                | Yes        | Yes              | No          | 0.0266              | Yes            |
| <i>Pteropus giganteus</i>              | indian flying fox               | LC          | No                     | Yes  | No     | No                | No         | No               | NA          | 0.0801              | NA             |
| <i>Pteropus pselaphon</i>              | bonin flying fox                | EN          | No                     | Yes  | No     | No                | No         | No               | NA          | NA                  | NA             |
| <i>Pteropus rufus</i>                  | malagasy flying fox             | VU          | No                     | Yes  | No     | No                | No         | No               | NA          | 0.2228              | NA             |
| <i>Pteropus vampyrus</i>               | large flying fox                | NT          | Yes                    | Yes  | Yes    | No                | Yes        | Yes              | No          | -0.0298             | Yes            |
| <i>Puma concolor</i>                   | puma                            | LC          | Yes                    | Yes  | Yes    | No                | Yes        | Yes              | No          | -0.1044             | No             |
| <i>Puma yagouaroundi</i>               | jaguarundi                      | NA          | No                     | Yes  | No     | No                | No         | No               | NA          | 0.3252              | NA             |
| <i>Pygathrix nemaeus</i>               | red-shanked douc langur         | CR          | Yes                    | Yes  | Yes    | Yes               | Yes        | Yes              | No          | 0.2401              | No             |
| <i>Rangifer tarandus tarandus</i>      | siberian reindeer               | VU          | Yes                    | Yes  | (Yes)  | No                | (Yes)      | (Yes)            | No          | 0.0623              | No             |
| <i>Rangifer tarandus granti</i>        | siberian reindeer               | VU          | No                     | Yes  | (Yes)  | No                | (Yes)      | (Yes)            | NA          | NA                  | NA             |
| <i>Raphicerus campestris</i>           | steenbok                        | LC          | No                     | Yes  | No     | No                | No         | No               | NA          | -0.0364             | NA             |
| <i>Rattus norvegicus</i>               | brown rat                       | LC          | Yes                    | Yes  | Yes    | No                | Yes        | Previous         | No          | 0.2479              | No             |
| <i>Rattus rattus</i>                   | roof rat                        | LC          | No                     | Yes  | No     | No                | No         | No               | NA          | -0.226              | NA             |
| <i>Redunca redunca</i>                 | common reedbuck                 | LC          | No                     | Yes  | No     | No                | No         | No               | NA          | -0.1577             | NA             |
| <i>Rhinoceros unicornis</i>            | indian rhinoceros               | VU          | No                     | Yes  | No     | No                | No         | No               | NA          | -0.6088             | NA             |
| <i>Rhinolophus ferrumequinum</i>       | greater horseshoe bat           | LC          | No                     | Yes  | No     | No                | No         | Previous         | NA          | -0.2243             | NA             |
| <i>Rhinolophus sinicus</i>             | chinese rufous horseshoe bat    | LC          | Yes                    | Yes  | Yes    | No                | Yes        | Yes              | Yes         | NA                  | Yes            |
| <i>Rhinopithecus bieti</i>             | black snub-nosed monkey         | EN          | Yes                    | Yes  | Yes    | Yes               | Yes        | Yes              | No          | NA                  | No             |
| <i>Rhinopithecus roxellana</i>         | golden snub-nosed monkey        | EN          | Yes                    | Yes  | Yes    | Yes               | Yes        | Yes              | No          | 0.2043              | No             |
| <i>Rhizomys pruinosus</i>              | hoary bamboo rat                | LC          | No                     | Yes  | No     | No                | No         | Yes              | NA          | NA                  | NA             |
| <i>Rhombomys opimus</i>                | great gerbil                    | LC          | No                     | Yes  | No     | No                | No         | No               | NA          | NA                  | NA             |
| <i>Rousettus aegyptiacus</i>           | egyptian fruit bat              | LC          | Yes                    | Yes  | Yes    | No                | Yes        | Previous         | No          | 0.0297              | Yes            |
| <i>Rousettus leschenaultii</i>         | Leschenault's rousette          | NA          | No                     | Yes  | No     | No                | No         | No               | NA          | NA                  | NA             |
| <i>Rousettus madagascariensis</i>      | malagasy rousette               | VU          | No                     | Yes  | No     | No                | No         | No               | NA          | NA                  | NA             |
| <i>Saguinus imperator</i>              | emperor tamarin                 | LC          | Yes                    | Yes  | Yes    | Yes               | Yes        | Yes              | No          | NA                  | No             |
| <i>Saiga tatarica</i>                  | steppe saiga                    | CR          | Yes                    | Yes  | Yes    | No                | No         | Yes              | No          | NA                  | No             |
| <i>Saimiri boliviensis boliviensis</i> | bolivian squirrel monkey        | LC          | Yes                    | Yes  | Yes    | Yes               | Yes        | Yes              | No          | 0.485               | No             |
| <i>Sapajus apella</i>                  | tufted capuchin                 | LC          | No                     | Yes  | No     | No                | No         | No               | NA          | NA                  | NA             |
| <i>Sarcophilus harrisii</i>            | tasmanian devil                 | EN          | No                     | No   | No     | No                | No         | No               | NA          | NA                  | NA             |
| <i>Scalopus aquaticus</i>              | eastern mole                    | LC          | Yes                    | Yes  | Yes    | No                | Yes        | Yes              | No          | 0.232               | No             |
| <i>Sciurus carolinensis</i>            | eastern gray squirrel           | LC          | No                     | Yes  | No     | No                | No         | No               | NA          | 0.1035              | NA             |
| <i>Sciurus vulgaris</i>                | red squirrel                    | LC          | No                     | Yes  | No     | No                | No         | No               | NA          | 0.1467              | NA             |
| <i>Semnopithecus entellus</i>          | northern plains gray langur     | LC          | Yes                    | Yes  | Yes    | Yes               | Yes        | Yes              | No          | 0.4229              | No             |
| <i>Sigmodon hispidus</i>               | hispid cotton rat               | LC          | Yes                    | Yes  | Yes    | No                | Yes        | Yes              | NA          | -0.2748             | No             |
| <i>Solenodon paradoxus</i>             | hispaniolan solenodon           | LC          | Yes                    | Yes  | Yes    | No                | Yes        | Yes              | NA          | -0.2864             | No             |
| <i>Sorex araneus</i>                   | common shrew                    | LC          | Yes                    | Yes  | Yes    | No                | Yes        | Yes              | No          | -0.0903             | No             |
| <i>Sousa chinensis</i>                 | indo-pacific humpbacked dolphin | VU          | No                     | Yes  | No     | No                | No         | No               | NA          | NA                  | NA             |
| <i>Spermophilus dauricus</i>           | daurian ground squirrel         | LC          | Yes                    | Yes  | Yes    | No                | Yes        | Yes              | Yes         | -0.0631             | No             |
| <i>Spilogale gracilis</i>              | western spotted skunk           | LC          | Yes                    | Yes  | Yes    | No                | Yes        | Yes              | No          | 0.1257              | No             |
| <i>Steno bredanensis</i>               | rough-toothed dolphin           | NA          | No                     | Yes  | No     | No                | No         | No               | NA          | NA                  | NA             |
| <i>Sturnira hondurensis</i>            | highland yellow-shouldered bat  | LC          | No                     | Yes  | No     | No                | No         | No               | NA          | 0.0299              | NA             |
| <i>Suricata suricatta</i>              | meerkat                         | LC          | Yes                    | Yes  | Yes    | No                | Yes        | Yes              | No          | 0.1275              | No             |
| <i>Sus scrofa</i>                      | pig                             | LC          | Yes                    | Yes  | Yes    | No                | Yes        | Previous         | No          | -0.2139             | No             |
| <i>Sylvicapra grimmia</i>              | bush duiker                     | LC          | No                     | Yes  | No     | No                | No         | No               | NA          | 0.0716              | NA             |
| <i>Sylvilagus bachmani</i>             | brush rabbit                    | LC          | No                     | Yes  | No     | No                | No         | No               | NA          | -0.0614             | NA             |
| <i>Syncerus caffer</i>                 | african buffalo                 | NT          | No                     | Yes  | No     | No                | No         | No               | NA          | -0.2962             | NA             |
| <i>Tadarida brasiliensis</i>           | mexican free-tailed bat         | LC          | Yes                    | Yes  | Yes    | No                | Yes        | Yes              | Yes         | NA                  | Yes            |

| Species                               | Common Name                     | IUCN Status | Bio-diversity Analysis | TOGA | Cactus | Primate phastCons | Phylo geny | Repeat Annotated | Hibernation | Brain Size Residual | Vocal Learning |
|---------------------------------------|---------------------------------|-------------|------------------------|------|--------|-------------------|------------|------------------|-------------|---------------------|----------------|
| <i>Talpa occidentalis</i>             | spanish mole                    | LC          | No                     | Yes  | No     | No                | No         | No               | NA          | NA                  | NA             |
| <i>Tamandua tetradactyla</i>          | southern tamandua               | LC          | Yes                    | Yes  | Yes    | No                | Yes        | Yes              | NA          | -0.0304             | NA             |
| <i>Tapirus indicus</i>                | malayan tapir                   | EN          | Yes                    | Yes  | Yes    | No                | Yes        | Yes              | NA          | -0.2942             | No             |
| <i>Tapirus terrestris</i>             | south american tapir            | VU          | Yes                    | Yes  | Yes    | No                | Yes        | Yes              | NA          | -0.3867             | No             |
| <i>Taxidea taxus jeffersonii</i>      | american badger                 | LC          | No                     | Yes  | No     | No                | No         | No               | NA          | 0.0462              | NA             |
| <i>Theropithecus gelada</i>           | gelada                          | LC          | No                     | Yes  | No     | No                | No         | No               | NA          | 0.4586              | NA             |
| <i>Thryonomys swinderianus</i>        | greater cane rat                | LC          | Yes                    | Yes  | Yes    | No                | Yes        | Yes              | NA          | -0.025              | No             |
| <i>Toxopneustes maculatus</i>         | southern three-banded armadillo | NT          | Yes                    | Yes  | Yes    | No                | Yes        | Yes              | NA          | -0.102              | NA             |
| <i>Tonatia saurophila</i>             | stripe-headed round-eared bat   | LC          | Yes                    | Yes  | Yes    | No                | Yes        | Yes              | NA          | NA                  | NA             |
| <i>Trachypithecus francoisi</i>       | françois' langur                | EN          | No                     | Yes  | No     | No                | No         | No               | NA          | 0.2656              | NA             |
| <i>Tragelaphus imberbis</i>           | lesser kudu                     | NT          | No                     | Yes  | No     | No                | No         | No               | NA          | -0.2706             | NA             |
| <i>Tragelaphus scriptus</i>           | bushbuck                        | LC          | No                     | Yes  | No     | No                | No         | No               | NA          | -0.0068             | NA             |
| <i>Tragelaphus strepsiceros</i>       | greater kudu                    | LC          | No                     | Yes  | No     | No                | No         | No               | NA          | -0.2679             | NA             |
| <i>Tragulus javanicus</i>             | java lesser chevrotain          | DD          | Yes                    | Yes  | Yes    | No                | Yes        | Yes              | No          | -0.0231             | No             |
| <i>Tragulus kanchil</i>               | lesser mouse-deer               | LC          | No                     | Yes  | No     | No                | No         | No               | NA          | NA                  | NA             |
| <i>Trichechus manatus latirostris</i> | florida manatee                 | EN          | Yes                    | Yes  | Yes    | No                | Yes        | Yes              | No          | -0.5879             | NA             |
| <i>Tupaia belangeri</i>               | northern tree shrew             | LC          | No                     | Yes  | No     | No                | No         | No               | NA          | NA                  | NA             |
| <i>Tupaia chinensis</i>               | northern tree shrew             | LC          | Yes                    | Yes  | Yes    | No                | Yes        | Yes              | No          | NA                  | No             |
| <i>Tupaia tana</i>                    | large treeshrew                 | LC          | Yes                    | No   | Yes    | No                | Yes        | Yes              | NA          | NA                  | No             |
| <i>Tursiops aduncus</i>               | indo-pacific bottlenose dolphin | NT          | No                     | Yes  | No     | No                | No         | No               | NA          | 0.5732              | NA             |
| <i>Tursiops truncatus</i>             | bottlenose dolphin              | LC          | Yes                    | Yes  | Yes    | No                | Yes        | Yes              | No          | 0.5329              | Yes            |
| <i>Urocyon v. parryi</i>              | daurian ground squirrel         | LC          | No                     | Yes  | No     | No                | No         | No               | NA          | NA                  | NA             |
| <i>Uromys caudimaculatus</i>          | giant uromys                    | NA          | No                     | Yes  | No     | No                | No         | No               | NA          | NA                  | NA             |
| <i>Uropsilus gracilis</i>             | gracile shrew mole              | LC          | Yes                    | Yes  | Yes    | No                | Yes        | Yes              | NA          | NA                  | No             |
| <i>Ursus americanus</i>               | american black bear             | LC          | No                     | Yes  | No     | No                | No         | No               | NA          | 0.3433              | NA             |
| <i>Ursus arctos horribilis</i>        | brown bear                      | LC          | No                     | Yes  | No     | No                | No         | No               | NA          | -0.0518             | NA             |
| <i>Ursus maritimus</i>                | polar bear                      | VU          | Yes                    | Yes  | Yes    | No                | Yes        | Yes              | Yes         | -0.1608             | No             |
| <i>Ursus thibetanus thibetanus</i>    | asian black bear                | VU          | No                     | Yes  | No     | No                | No         | No               | NA          | 0.0565              | NA             |
| <i>Vicugna pacos</i>                  | alpaca                          | LC          | Yes                    | Yes  | No     | No                | No         | No               | NA          | NA                  | NA             |
| <i>Vicugna pacos huacaya</i>          | alpaca                          | NA          | No                     | Yes  | Yes    | No                | Yes        | Yes              | NA          | NA                  | NA             |
| <i>Vicugna vicugna mensalis</i>       | vicugna                         | NA          | No                     | Yes  | No     | No                | No         | No               | NA          | NA                  | NA             |
| <i>Vombatus ursinus</i>               | common wombat                   | LC          | No                     | No   | No     | No                | No         | No               | NA          | NA                  | NA             |
| <i>Vulpes lagopus</i>                 | arctic fox                      | LC          | Yes                    | Yes  | Yes    | No                | Yes        | Yes              | No          | 0.1601              | No             |
| <i>Vulpes vulpes</i>                  | red fox                         | LC          | No                     | Yes  | No     | No                | No         | No               | NA          | 0.2776              | NA             |
| <i>Xerus inauris</i>                  | cape ground squirrel            | LC          | Yes                    | Yes  | Yes    | No                | Yes        | Yes              | No          | 0.1921              | No             |
| <i>Zalophus californianus</i>         | california sea lion             | LC          | Yes                    | Yes  | Yes    | No                | Yes        | Yes              | No          | 0.1481              | Yes            |
| <i>Zapus hudsonius</i>                | meadow jumping mouse            | LC          | Yes                    | Yes  | Yes    | No                | No         | Yes              | Yes         | 0.0686              | No             |
| <i>Ziphius cavirostris</i>            | cuvier's beaked whale           | LC          | Yes                    | Yes  | Yes    | No                | No         | Yes              | No          | -0.2056             | NA             |

**Table S1. Species' names, species' taxonomy, analyses in which species were included, and species' phenotype information.** "NA" means data was not available or not used in analysis.

Annotations in parentheses indicate that neither the phenotype annotation information nor the assembly in the Cactus alignment had an indication of subspecies, but the TOGA alignments have two subspecies. "Brain size residual" is the residual of the brain size when regressing out body size. IUCN status is abbreviated as DD = Data Deficient; LC = Least Concern; VU = Vulnerable; NT = Near Threatened; EN = Endangered; CR = Critically Endangered; EW = Extinct in the Wild.

|               | Human               |             |            | Chimp                  |             |            | Mouse               |             |            | Dog                           |             |            | Little brown bat        |             |            |
|---------------|---------------------|-------------|------------|------------------------|-------------|------------|---------------------|-------------|------------|-------------------------------|-------------|------------|-------------------------|-------------|------------|
|               | <i>Homo sapiens</i> |             |            | <i>Pan troglodytes</i> |             |            | <i>Mus musculus</i> |             |            | <i>Canis lupus familiaris</i> |             |            | <i>Myotis lucifugus</i> |             |            |
| genome (Gb)   |                     |             | 3.09       |                        |             | 3.1        |                     |             | 2.73       |                               |             | 2.33       |                         |             | 2.03       |
|               | phyloP cutoff       | % of genome | bases (Mb) | phyloP cutoff          | % of genome | bases (Mb) | phyloP cutoff       | % of genome | bases (Mb) | phyloP cutoff                 | % of genome | bases (Mb) | phyloP cutoff           | % of genome | bases (Mb) |
| % constrained |                     | 10.70%      | 331.7      |                        | 11.76%      | 358.8      |                     | 8.99%       | 238.5      |                               | 10.12%      | 244.8      |                         | 18.04%      | 367.0      |
| lower CI      | n/a                 | 10.70%      | 331.6      | n/a                    | 11.75%      | 358.3      | n/a                 | 8.96%       | 237.9      | n/a                           | 10.13%      | 244.2      | n/a                     | 18.04%      | 367.0      |
| upper CI      |                     | 10.74%      | 332.8      |                        | 11.83%      | 360.7      |                     | 9.02%       | 239.5      |                               | 10.18%      | 245.5      |                         | 18.04%      | 367.0      |
| < 1% FDR      | 3.27                | 1.87%       | 58         | 3.26                   | 1.80%       | 57         | 3.63                | 1.70%       | 47         | 3.52                          | 2.11%       | 49.2       | 3.48                    | 2.45%       | 50         |
| < 3% FDR      | 2.59                | 2.67%       | 82         | 2.59                   | 2.60%       | 81         | 3.02                | 2.10%       | 58         | 2.88                          | 2.84%       | 66         | 2.85                    | 3.27%       | 67         |
| < 5% FDR *    | 2.27                | 3.26%       | 101        | 2.27                   | 3.20%       | 99         | 2.7                 | 2.60%       | 71         | 2.56                          | 3.43%       | 79.8       | 2.54                    | 3.85%       | 78         |
| < 10% FDR     | 1.78                | 4.69%       | 145        | 1.78                   | 4.60%       | 142        | 2.27                | 3.20%       | 88         | 2.1                           | 4.69%       | 109.2      | 2.09                    | 5.16%       | 105        |
| < 20% FDR     | 1.25                | 7.56%       | 233        | 1.25                   | 7.40%       | 229        | 1.79                | 4.40%       | 120        | 1.59                          | 7.02%       | 163.4      | 1.61                    | 7.38%       | 150        |

**Table S2.**  
**Genome-wide constraint and proportions of the genome under constraint at different false discovery rates for human, chimpanzee, mouse, dog, and little brown bat.** Acronyms: Confidence Intervals (CI), False Discovery Rate (FDR), Megabases (Mb) and Gigabases (Gb).



| species                                   | Assembly    | Mb constrained |                         | % constrained |                         | branch length<br>to 9 closest<br>species | Genome<br>size (Mb) | scaffold<br>N50<br>(Mb) | contig<br>N50<br>(Mb) |
|-------------------------------------------|-------------|----------------|-------------------------|---------------|-------------------------|------------------------------------------|---------------------|-------------------------|-----------------------|
|                                           |             | <i>total</i>   | <i>FDR<br/>&lt;0.05</i> | <i>total</i>  | <i>FDR<br/>&lt;0.05</i> |                                          |                     |                         |                       |
| dog                                       | CanFam3.1   | 244.8          | 79.8                    | 10.12%        | 3.30%                   | 0.24                                     | 2411                | 45.9                    | 0.3                   |
| human                                     | GRCh38.p14  | 331.7          | 100.7                   | 10.70%        | 3.20%                   | 0.13                                     | 3100                | 67.8                    | 57.9                  |
| mouse                                     | GRCm39      | 238.5          | 70.8                    | 8.99%         | 2.70%                   | 0.67                                     | 2655                | 106.2                   | 59.5                  |
| bat                                       | Myoluc2.0   | 367.0          | 78.4                    | 18.04%        | 3.90%                   | 0.39                                     | 2035                | 4.3                     | 0.1                   |
| chimp                                     | Clint_PTRv2 | 358.8          | 98.7                    | 11.76%        | 3.20%                   | 0.13                                     | 3050                | 53.1                    | 12.3                  |
|                                           |             |                |                         |               |                         |                                          |                     |                         |                       |
| $\rho$ (all constraint)                   |             | Mb constrained |                         | cor           | -0.36                   | -0.20                                    | -0.70               | -0.70                   |                       |
|                                           |             |                |                         | p             | 0.55                    | 0.78                                     | 0.23                | 0.23                    |                       |
|                                           |             | % constrained  |                         | cor           | -0.36                   | -0.20                                    | -0.70               | -0.70                   |                       |
|                                           |             |                |                         | p             | 0.55                    | 0.78                                     | 0.23                | 0.23                    |                       |
| $\rho$ (bases constrained at<br>FDR<0.05) |             | Mb constrained |                         | cor           | <b>-0.97</b>            | 0.70                                     | 0.00                | 0.00                    |                       |
|                                           |             |                |                         | p             | <b>0.0048</b>           | 0.23                                     | 1.00                | 1.00                    |                       |
|                                           |             | % constrained  |                         | cor           | -0.05                   | -0.60                                    | -0.90               | -0.90                   |                       |
|                                           |             |                |                         | p             | 0.93                    | 0.35                                     | 0.08                | 0.08                    |                       |

**Table S3. Constraint and genome quality information for mammals with Zoonomia phyloP scores. Bold indicates results that are significant ( $p < 0.05$ ) after FDR correction.**

| direction   | gene set                                                               | genes in set | overlap | expected overlap | ratio | p       | FDR     |
|-------------|------------------------------------------------------------------------|--------------|---------|------------------|-------|---------|---------|
| conserved   | GO:0006397: mRNA processing                                            | 487          | 81      | 27.4             | 2.96  | 0       | 0       |
| conserved   | GO:0198738: cell-cell signaling by wnt                                 | 460          | 79      | 25.9             | 3.05  | 0       | 0       |
| conserved   | GO:0007389: pattern specification process                              | 433          | 76      | 24.4             | 3.12  | 0       | 0       |
| conserved   | GO:0008380: RNA splicing                                               | 417          | 74      | 23.5             | 3.15  | 0       | 0       |
| conserved   | GO:1903311: regulation of mRNA metabolic process                       | 266          | 65      | 15.0             | 4.34  | 0       | 0       |
| conserved   | GO:0048706: embryonic skeletal system development                      | 125          | 42      | 7.0              | 5.97  | 0       | 0       |
| accelerated | GO:0098542: defense response to other organism                         | 473          | 49      | 12.3             | 4.00  | 0       | 0       |
| accelerated | GO:0043588: skin development                                           | 409          | 47      | 10.6             | 4.43  | 0       | 0       |
| conserved   | GO:0030900: forebrain development                                      | 375          | 64      | 21.1             | 3.03  | 8.9E-16 | 1.1E-13 |
| accelerated | GO:0008544: epidermis development                                      | 455          | 46      | 11.8             | 3.90  | 1.9E-15 | 5.3E-13 |
| conserved   | GO:0045165: cell fate commitment                                       | 249          | 49      | 14.0             | 3.50  | 8.5E-15 | 9.1E-13 |
| accelerated | GO:0001906: cell killing                                               | 157          | 27      | 4.1              | 6.63  | 4.7E-15 | 9.9E-13 |
| conserved   | GO:0048736: appendage development                                      | 177          | 40      | 10.0             | 4.02  | 2.2E-14 | 2.1E-12 |
| conserved   | GO:0010608: posttranscriptional regulation of gene expression          | 486          | 72      | 27.3             | 2.63  | 2.8E-14 | 2.2E-12 |
| accelerated | GO:0006959: humoral immune response                                    | 242          | 28      | 6.3              | 4.46  | 3.3E-11 | 5.7E-09 |
| accelerated | GO:0045088: regulation of innate immune response                       | 369          | 31      | 9.6              | 3.24  | 8.8E-09 | 1.2E-06 |
| accelerated | GO:0031349: positive regulation of defense response                    | 427          | 31      | 11.1             | 2.80  | 2.4E-07 | 3.0E-05 |
| accelerated | GO:0035821: modification of morphology or physiology of other organism | 155          | 17      | 4.0              | 4.23  | 5.7E-07 | 6.0E-05 |
| accelerated | GO:0007606: sensory perception of chemical stimulus                    | 473          | 32      | 12.3             | 2.61  | 7.5E-07 | 7.1E-05 |
| accelerated | GO:0030101: natural killer cell activation                             | 85           | 12      | 2.2              | 5.44  | 1.9E-06 | 1.6E-04 |

**Table S4.**  
**GO Biological Process gene sets enriched for conserved or accelerated genes.** We tested the top 5% most accelerated (low scoring) and most conserved (high scoring) genes as measured by mean phyloP score of coding sequence (Data S1) against a non-redundant representative set of Gene Ontology biological processes using WebGestalt.

|    | Gene set                                                                                                                    | Binomial P | Binomial Bonferroni P | Observed Regions | Observed Genes | Total Genes | Gene Set Cov | Term Cov |
|----|-----------------------------------------------------------------------------------------------------------------------------|------------|-----------------------|------------------|----------------|-------------|--------------|----------|
| BP | GO:000122: negative regulation of transcription from RNA polymerase II promoter                                             | 8.31E-291  | 1.07E-286             | 1327             | 197            | 796         | 0.1014       | 0.2475   |
| BP | GO:0006366: transcription from RNA polymerase II promoter                                                                   | 3.65E-284  | 4.72E-280             | 1233             | 210            | 824         | 0.1081       | 0.2549   |
| BP | GO:0003002: regionalization                                                                                                 | 4.86E-170  | 6.28E-166             | 684              | 110            | 312         | 0.0566       | 0.3526   |
| BP | GO:0007417: central nervous system development                                                                              | 3.13E-164  | 4.04E-160             | 1271             | 199            | 875         | 0.1024       | 0.2274   |
| BP | GO:0007389: pattern specification process                                                                                   | 6.40E-155  | 8.26E-151             | 751              | 132            | 405         | 0.0679       | 0.3259   |
| BP | GO:0045165: cell fate commitment                                                                                            | 8.83E-149  | 1.14E-144             | 617              | 81             | 227         | 0.0417       | 0.3568   |
| BP | GO:0021953: central nervous system neuron differentiation                                                                   | 1.63E-142  | 2.11E-138             | 551              | 67             | 163         | 0.0345       | 0.4110   |
| BP | GO:0021516: dorsal spinal cord development                                                                                  | 2.08E-132  | 2.69E-128             | 172              | 13             | 21          | 0.0067       | 0.6190   |
| BP | GO:0043576: regulation of respiratory gaseous exchange                                                                      | 1.39E-120  | 1.80E-116             | 170              | 9              | 23          | 0.0046       | 0.3913   |
| BP | GO:0009790: embryo development                                                                                              | 1.02E-118  | 1.32E-114             | 1087             | 220            | 905         | 0.1132       | 0.2431   |
| BP | GO:0030900: forebrain development                                                                                           | 1.60E-114  | 2.07E-110             | 721              | 107            | 365         | 0.0551       | 0.2932   |
| BP | GO:0060322: head development                                                                                                | 6.14E-112  | 7.94E-108             | 991              | 165            | 713         | 0.0849       | 0.2314   |
| BP | GO:0007420: brain development                                                                                               | 1.07E-111  | 1.39E-107             | 965              | 156            | 675         | 0.0803       | 0.2311   |
| BP | GO:0009792: embryo development ending in birth or egg hatching                                                              | 3.17E-104  | 4.09E-100             | 749              | 132            | 560         | 0.0679       | 0.2357   |
| BP | GO:0043009: chordate embryonic development                                                                                  | 2.97E-103  | 3.84E-99              | 744              | 131            | 555         | 0.0674       | 0.2360   |
| BP | GO:0009952: anterior/posterior pattern specification                                                                        | 1.38E-96   | 1.78E-92              | 394              | 63             | 196         | 0.0324       | 0.3214   |
| BP | GO:0002087: regulation of respiratory gaseous exchange by neurological system process                                       | 4.02E-95   | 5.19E-91              | 128              | 6              | 13          | 0.0031       | 0.4615   |
| BP | GO:0001708: cell fate specification                                                                                         | 1.06E-94   | 1.36E-90              | 295              | 33             | 72          | 0.0170       | 0.4583   |
| BP | GO:0048598: embryonic morphogenesis                                                                                         | 4.43E-94   | 5.72E-90              | 770              | 143            | 550         | 0.0736       | 0.2600   |
| BP | GO:0030182: neuron differentiation                                                                                          | 5.27E-92   | 6.81E-88              | 1181             | 211            | 921         | 0.1086       | 0.2291   |
| MF | GO:0000981: RNA polymerase II transcription factor activity, sequence-specific DNA binding                                  | 0.00E+00   | 0.00E+00              | 1644             | 227            | 766         | 0.1168       | 0.2963   |
| MF | GO:0001067: regulatory region nucleic acid binding                                                                          | 0.00E+00   | 0.00E+00              | 1450             | 248            | 849         | 0.1276       | 0.2921   |
| MF | GO:0000975: regulatory region DNA binding                                                                                   | 0.00E+00   | 0.00E+00              | 1445             | 247            | 848         | 0.1271       | 0.2913   |
| MF | GO:0044212: transcription regulatory region DNA binding                                                                     | 0.00E+00   | 0.00E+00              | 1445             | 247            | 846         | 0.1271       | 0.2920   |
| MF | GO:0003690: double-stranded DNA binding                                                                                     | 0.00E+00   | 0.00E+00              | 1393             | 224            | 809         | 0.1153       | 0.2769   |
| MF | GO:1990837: sequence-specific double-stranded DNA binding                                                                   | 0.00E+00   | 0.00E+00              | 1377             | 216            | 731         | 0.1112       | 0.2955   |
| MF | GO:0000976: transcription regulatory region sequence-specific DNA binding                                                   | 0.00E+00   | 0.00E+00              | 1359             | 209            | 692         | 0.1076       | 0.3020   |
| MF | GO:0001012: RNA polymerase II regulatory region DNA binding                                                                 | 0.00E+00   | 0.00E+00              | 1223             | 194            | 613         | 0.0998       | 0.3165   |
| MF | GO:0000977: RNA polymerase II regulatory region sequence-specific DNA binding                                               | 0.00E+00   | 0.00E+00              | 1222             | 193            | 611         | 0.0993       | 0.3159   |
| MF | GO:0000982: transcription factor activity, RNA polymerase II core promoter proximal region sequence-specific binding        | 3.77E-292  | 1.57E-288             | 1027             | 136            | 400         | 0.0700       | 0.3400   |
| MF | GO:0001159: core promoter proximal region DNA binding                                                                       | 3.20E-239  | 1.34E-235             | 867              | 127            | 379         | 0.0654       | 0.3351   |
| MF | GO:0000987: core promoter proximal region sequence-specific DNA binding                                                     | 1.31E-238  | 5.47E-235             | 863              | 125            | 376         | 0.0643       | 0.3324   |
| MF | GO:0001227: transcriptional repressor activity, RNA polymerase II transcription regulatory region sequence-specific binding | 4.34E-220  | 1.81E-216             | 661              | 59             | 226         | 0.0304       | 0.2611   |

|    |                                                                                                                             |           |           |     |     |     |        |        |
|----|-----------------------------------------------------------------------------------------------------------------------------|-----------|-----------|-----|-----|-----|--------|--------|
| MF | GO:0001228: transcriptional activator activity, RNA polymerase II transcription regulatory region sequence-specific binding | 2.00E-202 | 8.35E-199 | 847 | 138 | 410 | 0.0710 | 0.3366 |
| MF | GO:0000978: RNA polymerase II core promoter proximal region sequence-specific DNA binding                                   | 5.36E-201 | 2.24E-197 | 781 | 119 | 361 | 0.0612 | 0.3296 |
| MF | GO:0001078: transcriptional repressor activity, RNA polymerase II core promoter proximal region sequence-specific binding   | 7.87E-151 | 3.29E-147 | 436 | 39  | 133 | 0.0201 | 0.2932 |
| MF | GO:0001077: transcriptional activator activity, RNA polymerase II core promoter proximal region sequence-specific binding   | 8.21E-133 | 3.43E-129 | 603 | 102 | 274 | 0.0525 | 0.3723 |
| MF | GO:0001205: transcriptional activator activity, RNA polymerase II distal enhancer sequence-specific binding                 | 5.36E-123 | 2.24E-119 | 184 | 10  | 30  | 0.0051 | 0.3333 |
| MF | GO:0003705: transcription factor activity, RNA polymerase II distal enhancer sequence-specific binding                      | 5.14E-110 | 2.14E-106 | 312 | 26  | 100 | 0.0134 | 0.2600 |
| MF | GO:0008134: transcription factor binding                                                                                    | 1.42E-102 | 5.93E-99  | 678 | 128 | 531 | 0.0659 | 0.2411 |
| CC | GO:0005667: transcription factor complex                                                                                    | 1.74E-112 | 2.90E-109 | 517 | 75  | 315 | 0.0386 | 0.2381 |
| CC | GO:0000785: chromatin                                                                                                       | 1.79E-77  | 2.98E-74  | 476 | 87  | 486 | 0.0448 | 0.1790 |
| CC | GO:0000813: ESCRT I complex                                                                                                 | 1.55E-73  | 2.59E-70  | 70  | 1   | 10  | 0.0005 | 0.1000 |
| CC | GO:1990429: peroxisomal importomer complex                                                                                  | 1.91E-65  | 3.19E-62  | 43  | 1   | 2   | 0.0005 | 0.5000 |
| CC | GO:0005730: nucleolus                                                                                                       | 1.11E-64  | 1.85E-61  | 674 | 132 | 930 | 0.0679 | 0.1419 |
| CC | GO:0044427: chromosomal part                                                                                                | 3.03E-64  | 5.05E-61  | 637 | 131 | 852 | 0.0674 | 0.1538 |
| CC | GO:0005694: chromosome                                                                                                      | 2.41E-61  | 4.02E-58  | 694 | 155 | 975 | 0.0798 | 0.1590 |
| CC | GO:0000790: nuclear chromatin                                                                                               | 6.81E-56  | 1.13E-52  | 333 | 55  | 316 | 0.0283 | 0.1741 |
| CC | GO:0044454: nuclear chromosome part                                                                                         | 4.02E-49  | 6.70E-46  | 414 | 72  | 514 | 0.0371 | 0.1401 |
| CC | GO:0036452: ESCRT complex                                                                                                   | 8.64E-49  | 1.44E-45  | 70  | 1   | 28  | 0.0005 | 0.0357 |
| CC | GO:0000228: nuclear chromosome                                                                                              | 6.90E-48  | 1.15E-44  | 434 | 80  | 550 | 0.0412 | 0.1455 |
| CC | GO:0032993: protein-DNA complex                                                                                             | 1.10E-39  | 1.84E-36  | 178 | 22  | 202 | 0.0113 | 0.1089 |
| CC | GO:0016607: nuclear speck                                                                                                   | 3.14E-36  | 5.23E-33  | 322 | 77  | 373 | 0.0396 | 0.2064 |
| CC | GO:0034451: centriolar satellite                                                                                            | 8.44E-35  | 1.41E-31  | 58  | 3   | 26  | 0.0015 | 0.1154 |
| CC | GO:0016604: nuclear body                                                                                                    | 1.09E-34  | 1.82E-31  | 498 | 123 | 721 | 0.0633 | 0.1706 |
| CC | GO:0016363: nuclear matrix                                                                                                  | 2.69E-31  | 4.48E-28  | 154 | 20  | 104 | 0.0103 | 0.1923 |
| CC | GO:0034399: nuclear periphery                                                                                               | 2.05E-28  | 3.41E-25  | 164 | 24  | 129 | 0.0124 | 0.1860 |
| CC | GO:0008023: transcription elongation factor complex                                                                         | 8.31E-27  | 1.38E-23  | 79  | 12  | 56  | 0.0062 | 0.2143 |
| CC | GO:0043657: host cell                                                                                                       | 2.61E-26  | 4.35E-23  | 81  | 8   | 68  | 0.0041 | 0.1176 |
| CC | GO:0016593: Cdc73/Paf1 complex                                                                                              | 1.99E-25  | 3.32E-22  | 36  | 3   | 8   | 0.0015 | 0.3750 |

**Table S5.**  
**Gene set enrichment in ultraconserved elements** Enrichment tested using GREAT version 4.0.4 with human genome version hg38. The association rule was Basal+extension: 5000 bp upstream, 1000 bp downstream, 1000000 bp max extension, curated regulatory domains included. BP = Biological Process; MF = Molecular Function; CC = Cellular Component.

| chr   | start     | end       | length | qval     | .std.resid          | fraction<br>constrained<br>at FDR<0.05 | fraction<br>coding | gene(s)             |
|-------|-----------|-----------|--------|----------|---------------------|----------------------------------------|--------------------|---------------------|
| chr2  | 178500000 | 178600000 | 100000 | 0.02534  | 4.06                | 0.376                                  | 0.52226            | PLEKHA3, TTN        |
| chr7  | 271000000 | 272000000 | 100000 | 0.000025 | 6.02                | 0.333                                  | 0.09744            | HOXA                |
| chr2  | 176100000 | 176200000 | 100000 | 0.000754 | 5.15                | 0.263                                  | 0.07629            | HOXD                |
| chr2  | 144400000 | 144600000 | 200000 | 0.000022 | 6.15, 5.94          | 0.232                                  | 0.00811            | ZEB2                |
| chr17 | 485000000 | 486000000 | 100000 | 0.005084 | 4.62                | 0.222                                  | 0.05957            | HOXB                |
| chr12 | 539000000 | 541000000 | 200000 | 0.00014  | 4.31, 5.58          | 0.215                                  | 0.03836            | HOXC                |
| chr1  | 275000000 | 276000000 | 100000 | 0.00216  | 4.84                | 0.206                                  | 0.04808            | AHDC1               |
| chr2  | 604000000 | 606000000 | 200000 | 0.000066 | 4.19, 5.74          | 0.192                                  | 0.01562            | BCL11A              |
| chr7  | 114600000 | 114700000 | 100000 | 0.010962 | 4.42                | 0.186                                  | 0.01984            | FOXP2               |
| chr1  | 873000000 | 874000000 | 100000 | 0.00278  | 4.77                | 0.180                                  | 0.00491            | LMO4                |
| chr18 | 251000000 | 252000000 | 100000 | 0.001778 | 4.92                | 0.174                                  | 0.00105            | ZNF521              |
| chr10 | 113100000 | 113200000 | 100000 | 0.010962 | 4.42                | 0.173                                  | 0.01511            | TCF7L2              |
| chr1  | 107000000 | 108000000 | 100000 | 0.000442 | 5.26                | 0.172                                  | 0.00000            | CASZ1               |
| chr15 | 369000000 | 371000000 | 200000 | 0.001091 | 4.35, 5.04          | 0.169                                  | 0.00547            | MEIS2               |
| chr15 | 963000000 | 964000000 | 100000 | 0.010969 | 4.4                 | 0.168                                  | 0.01281            | NR2F2               |
| chr3  | 114400000 | 114500000 | 100000 | 0.00216  | 4.86                | 0.167                                  | 0.00000            | ZBTB20              |
| chr10 | 129800000 | 130000000 | 200000 | 0.001091 | 4.79, 5.03          | 0.167                                  | 0.00942            | EBF3                |
| chr2  | 172000000 | 172100000 | 100000 | 0.013449 | 4.32                | 0.160                                  | 0.01728            | DLX1, DLX2, METAP1D |
| chr3  | 624000000 | 625000000 | 100000 | 0.023289 | 4.09                | 0.160                                  | 0.01293            | CADPS               |
| chr10 | 619000000 | 621000000 | 200000 | 0.017361 | 4.18, 3.96          | 0.155                                  | 0.01793            | ARID5B              |
| chr2  | 589000000 | 590000000 | 100000 | 0.000992 | 5.08                | 0.154                                  | 0.00000            | LINC01122           |
| chr1  | 442000000 | 443000000 | 100000 | 0.047713 | 3.88                | 0.151                                  | 0.02023            | DMAP1, ER13         |
| chr5  | 141800000 | 141900000 | 100000 | 0.019259 | 4.14                | 0.151                                  | 0.03913            | PCDH1               |
| chr3  | 710000000 | 711000000 | 100000 | 0.018405 | 4.15                | 0.151                                  | 0.00795            | FOXP1               |
| chr14 | 336000000 | 337000000 | 100000 | 0.014583 | 4.25                | 0.150                                  | 0.00297            | NPAS3               |
| chr5  | 158900000 | 159100000 | 200000 | 0.013874 | 4.29, 4.27          | 0.150                                  | 0.00274            | EBF1                |
| chr16 | 730000000 | 731000000 | 100000 | 0.00216  | 4.85                | 0.150                                  | 0.00000            | ZFHX3               |
| chr5  | 139600000 | 139700000 | 100000 | 0.016727 | 4.2                 | 0.147                                  | 0.01376            | CXXC5, UBE2D2       |
| chr8  | 766000000 | 767000000 | 100000 | 0.000159 | 5.52                | 0.145                                  | 0.00000            | ZFHX4               |
| chr2  | 664000000 | 667000000 | 300000 | 0.000387 | 4.26, 5.33,<br>4.4  | 0.145                                  | 0.00548            | MEIS1               |
| chr10 | 215000000 | 216000000 | 100000 | 0.016727 | 4.19                | 0.141                                  | 0.03657            | MLLT10, SKIDA1      |
| chr2  | 143300000 | 143400000 | 100000 | 0.008396 | 4.5                 | 0.140                                  | 0.00000            | ARHGAP15            |
| chr15 | 366000000 | 367000000 | 100000 | 0.012204 | 4.36                | 0.135                                  | 0.00469            | CDIN1               |
| chr2  | 143600000 | 143700000 | 100000 | 0.012204 | 4.36                | 0.135                                  | 0.00134            | ARHGAP15            |
| chr10 | 757000000 | 758000000 | 100000 | 0.012856 | 4.33                | 0.134                                  | 0.00046            | LRMDA               |
| chr2  | 630000000 | 631000000 | 100000 | 0.02831  | 4.02                | 0.134                                  | 0.01547            | EHBPI, OTX1         |
| chr9  | 125700000 | 125900000 | 200000 | 0.013763 | 4.3, 4.21           | 0.133                                  | 0.00153            | MAPKAP1, PBX3       |
| chr9  | 123700000 | 123800000 | 100000 | 0.025537 | 4.05                | 0.132                                  | 0.00211            | DENND1A             |
| chr3  | 169200000 | 169500000 | 300000 | 0.006499 | 4.56, 4.03,<br>4.29 | 0.132                                  | 0.00112            | MECOM               |

|       |           |           |        |          |            |       |         |           |
|-------|-----------|-----------|--------|----------|------------|-------|---------|-----------|
| chr2  | 163700000 | 163800000 | 100000 | 0.016727 | 4.19       | 0.132 | 0.00024 | FIGN      |
| chr3  | 181700000 | 181800000 | 100000 | 0.047781 | 3.86       | 0.131 | 0.00950 | SOX2      |
| chr1  | 62900000  | 63000000  | 100000 | 0.025537 | 4.05       | 0.128 | 0.00000 | LINC01739 |
| chr10 | 101400000 | 101500000 | 100000 | 0.003673 | 4.7        | 0.127 | 0.00273 | BTRC      |
| chr2  | 59900000  | 60000000  | 100000 | 0.047713 | 3.87       | 0.126 | 0.00000 |           |
| chr10 | 100600000 | 100800000 | 200000 | 0.03856  | 3.93, 3.85 | 0.125 | 0.00367 | PAX2      |
| chr13 | 72500000  | 72600000  | 100000 | 0.047781 | 3.87       | 0.117 | 0.00000 |           |
| chr9  | 106800000 | 106900000 | 100000 | 0.010962 | 4.42       | 0.116 | 0.00000 | ZNF462    |
| chr5  | 88600000  | 88700000  | 100000 | 0.018096 | 4.16       | 0.111 | 0.00000 |           |
| chr1  | 87500000  | 87600000  | 100000 | 0.021706 | 4.11       | 0.110 | 0.00000 |           |
| chr15 | 84400000  | 84500000  | 100000 | 0.014583 | 4.25       | 0.098 | 0.00000 |           |
| chr1  | 90800000  | 90900000  | 100000 | 0.031255 | 3.99       | 0.092 | 0.00000 |           |
| chr17 | 20700000  | 20800000  | 100000 | 0.014583 | 4.25       | 0.091 | 0.00000 |           |
| chrX  | 74100000  | 74200000  | 100000 | 0.047713 | 3.87       | 0.053 | 0.00000 |           |
| chr19 | 8900000   | 9000000   | 100000 | 0.000395 | -5.31      | 0.008 | 0.38947 | MUC16     |

**Table S6.**  
**Constrained or accelerated regions ( $\geq 100$  Kb) in the human genome.** Regions with significantly high (positive standardized residual) or low (negative standardized residual, only one window) constraint ( $q < 0.05$  from a linear model).

| Gene desert                                      | Element              | N     | Proportion of constraint |      | phyloP |      |
|--------------------------------------------------|----------------------|-------|--------------------------|------|--------|------|
|                                                  |                      |       | Mean                     | SD   | Mean   | SD   |
| Bordering developmental transcription factor     | Deserts              | 224   | 0.04                     | 0.02 | 0.12   | 0.18 |
|                                                  | cCREs within deserts | 38065 | 0.12                     | 0.2  | 0.53   | 1.16 |
| Not bordering developmental transcription factor | Deserts              | 649   | 0.02                     | 0.01 | 0.06   | 0.13 |
|                                                  | cCREs within deserts | 90087 | 0.08                     | 0.15 | 0.32   | 0.85 |

**Table S7.**  
**The proportion of bases under constraint is higher in gene deserts neighboring developmental transcription factors.** Gene deserts are defined as the longest 5% of intergenic regions.

| TF     | TF Family        | # Const-<br>rained | # Unconst-<br>rained | Correlation<br>(Constrained) | p Correlation<br>(Constrained) | Correlation<br>(Unconstrained) | p Correlation<br>(Unconstrained) |
|--------|------------------|--------------------|----------------------|------------------------------|--------------------------------|--------------------------------|----------------------------------|
| HIF1A  | bHLH             | 16257              | 90830                | 1.00                         | 0.035                          | 0.45                           | 0.703                            |
| ZBTB17 | C2H2 ZF          | 3579               | 7145                 | 0.95                         | 3.9E-08                        | 0.65                           | 8.8E-03                          |
| NFIA   | SMAD             | 15111              | 48067                | 0.95                         | 4.1E-08                        | 0.53                           | 0.041                            |
| KLF14  | C2H2 ZF          | 691                | 803                  | 0.93                         | 3.2E-10                        | 0.67                           | 5.9E-04                          |
| ZNF148 | C2H2 ZF          | 7102               | 18365                | 0.93                         | 4.2E-06                        | 0.72                           | 5.4E-03                          |
| ETV2   | Ets              | 4520               | 7386                 | 0.92                         | 6.1E-06                        | 0.76                           | 2.8E-03                          |
| ESR1   | Nuclear receptor | 76409              | 572776               | 0.92                         | 8.7E-03                        | 0.63                           | 0.178                            |
| NFIC   | SMAD             | 23072              | 52406                | 0.92                         | 1.0E-06                        | 0.48                           | 0.067                            |
| EBF3   | EBF1             | 11491              | 46846                | 0.91                         | 5.6E-04                        | 0.89                           | 1.4E-03                          |
| CEBPZ  | Unknown          | 1211               | 1022                 | 0.91                         | 5.7E-06                        | 0.36                           | 0.209                            |
| NFIB   | SMAD             | 6226               | 17244                | 0.91                         | 2.4E-06                        | 0.49                           | 0.061                            |
| SP1    | C2H2 ZF          | 27114              | 83180                | 0.91                         | 1.1E-04                        | 0.70                           | 0.017                            |
| SP3    | C2H2 ZF          | 5825               | 5329                 | 0.91                         | 1.1E-04                        | 0.66                           | 0.026                            |
| ZNF281 | C2H2 ZF          | 1441               | 1380                 | 0.90                         | 3.7E-06                        | 0.50                           | 0.060                            |
| KLF10  | C2H2 ZF          | 5306               | 5138                 | 0.90                         | 5.4E-08                        | 0.64                           | 2.2E-03                          |
| GRHL1  | Grainyhead       | 3470               | 10449                | 0.90                         | 8.5E-08                        | 0.39                           | 0.090                            |
| SOX10  | HMG/Sox          | 1906               | 2955                 | 0.90                         | 2.6E-06                        | 0.10                           | 0.716                            |
| EBF1   | EBF1             | 12967              | 68205                | 0.90                         | 1.9E-04                        | 0.75                           | 7.4E-03                          |
| ZNF768 | C2H2 ZF          | 628                | 11704                | 0.89                         | 1.9E-06                        | 0.48                           | 0.052                            |
| NFYB   | Unknown          | 4116               | 4325                 | 0.89                         | 4.4E-06                        | 0.28                           | 0.291                            |
| ZBTB7A | C2H2 ZF          | 5558               | 16061                | 0.89                         | 5.1E-05                        | 0.84                           | 3.3E-04                          |
| NFYA   | CBF/NF-Y         | 2938               | 3182                 | 0.88                         | 7.6E-04                        | 0.27                           | 0.458                            |
| HSF2   | HSF              | 70                 | 281                  | 0.88                         | 1.5E-07                        | 0.75                           | 1.0E-04                          |
| ETV4   | Ets              | 10161              | 17049                | 0.88                         | 8.1E-04                        | 0.47                           | 0.169                            |
| THAP11 | THAP finger      | 1781               | 1232                 | 0.87                         | 5.3E-06                        | 0.56                           | 0.019                            |
| SP4    | C2H2 ZF          | 12632              | 14916                | 0.87                         | 9.0E-08                        | 0.33                           | 0.119                            |
| CTCF   | C2H2 ZF          | 75291              | 433692               | 0.86                         | 6.5E-05                        | 0.50                           | 0.068                            |
| ETV1   | Ets              | 15214              | 26155                | 0.85                         | 8.2E-03                        | 0.63                           | 0.094                            |
| NFE2L1 | bZIP             | 4040               | 12268                | 0.84                         | 1.3E-03                        | 0.41                           | 0.209                            |
| NFATC1 | Rel              | 492                | 1245                 | 0.83                         | 7.3E-04                        | 0.67                           | 0.018                            |
| ZNF652 | C2H2 ZF          | 3935               | 18705                | 0.83                         | 8.3E-05                        | 0.43                           | 0.097                            |
| ETS1   | Ets              | 37449              | 118771               | 0.82                         | 0.012                          | 0.73                           | 0.041                            |
| MAZ    | C2H2 ZF          | 13194              | 22812                | 0.82                         | 0.013                          | 0.77                           | 0.026                            |
| KLF15  | C2H2 ZF          | 7208               | 8718                 | 0.82                         | 2.0E-03                        | 0.46                           | 0.157                            |
| KLF9   | C2H2 ZF          | 15912              | 33500                | 0.82                         | 2.1E-03                        | 0.42                           | 0.195                            |
| ZNF467 | C2H2 ZF          | 4557               | 19604                | 0.82                         | 6.3E-08                        | 0.42                           | 0.025                            |
| ZBTB33 | C2H2 ZF          | 1047               | 1679                 | 0.82                         | 3.9E-03                        | -0.49                          | 0.150                            |
| ERG    | Ets              | 53960              | 205856               | 0.81                         | 0.014                          | 0.66                           | 0.073                            |
| MYF5   | bHLH             | 7529               | 11479                | 0.81                         | 0.014                          | 0.35                           | 0.397                            |
| SRF    | MADS box         | 8256               | 39910                | 0.81                         | 1.4E-04                        | 0.32                           | 0.227                            |
| EGR2   | C2H2 ZF          | 17045              | 68197                | 0.81                         | 4.5E-03                        | 0.54                           | 0.108                            |
| NFKB2  | Rel              | 5629               | 27339                | 0.81                         | 2.5E-03                        | 0.61                           | 0.045                            |
| ELK4   | Ets              | 5571               | 6787                 | 0.81                         | 0.015                          | 0.21                           | 0.616                            |
| LYL1   | bHLH             | 11059              | 50209                | 0.80                         | 0.030                          | 0.46                           | 0.299                            |



| TF      | TF Family        | # Const-<br>rained | # Unconst-<br>rained | Correlation<br>(Constrained) | p Correlation<br>(Constrained) | Correlation<br>(Unconstrained) | p Correlation<br>(Unconstrained) |
|---------|------------------|--------------------|----------------------|------------------------------|--------------------------------|--------------------------------|----------------------------------|
| GLIS3   | C2H2 ZF          | 5638               | 24841                | 0.80                         | 1.7E-03                        | 0.68                           | 0.015                            |
| ZNF436  | C2H2 ZF          | 491                | 3830                 | 0.80                         | 1.1E-08                        | 0.85                           | 1.3E-10                          |
| EGR1    | C2H2 ZF          | 18848              | 51720                | 0.80                         | 5.2E-03                        | 0.60                           | 0.068                            |
| KLF1    | C2H2 ZF          | 9243               | 15629                | 0.80                         | 3.0E-03                        | 0.66                           | 0.029                            |
| ZNF320  | C2H2 ZF          | 727                | 5951                 | 0.80                         | 2.2E-05                        | 0.66                           | 1.5E-03                          |
| GRHL2   | Grainyhead       | 20573              | 100773               | 0.80                         | 2.4E-05                        | 0.25                           | 0.294                            |
| TP73    | p53              | 3901               | 20260                | 0.79                         | 8.2E-05                        | -0.16                          | 0.517                            |
| CTCF    | C2H2 ZF          | 28837              | 36093                | 0.79                         | 1.2E-03                        | 0.42                           | 0.153                            |
| ERF     | Ets              | 12748              | 33505                | 0.79                         | 0.020                          | 0.63                           | 0.091                            |
| NFATC2  | Rel              | 2069               | 7497                 | 0.79                         | 0.011                          | 0.62                           | 0.073                            |
| ZFP42   | C2H2 ZF          | 970                | 1296                 | 0.79                         | 2.5E-03                        | -0.35                          | 0.260                            |
| KLF3    | C2H2 ZF          | 3088               | 4744                 | 0.78                         | 0.012                          | 0.38                           | 0.310                            |
| NFYC    | Unknown          | 7890               | 16400                | 0.78                         | 7.3E-03                        | -0.16                          | 0.660                            |
| GABPA   | Ets              | 22241              | 71990                | 0.78                         | 0.023                          | 0.52                           | 0.185                            |
| POU2F2  | Homeodomain; POU | 5572               | 20522                | 0.78                         | 0.024                          | 0.36                           | 0.383                            |
| TFE3    | bHLH             | 8549               | 23408                | 0.77                         | 0.024                          | 0.36                           | 0.377                            |
| ELF2    | Ets              | 2183               | 1981                 | 0.77                         | 0.026                          | 0.53                           | 0.179                            |
| EGR3    | C2H2 ZF          | 19579              | 75145                | 0.77                         | 0.026                          | 0.64                           | 0.086                            |
| HAND1   | bHLH             | 300                | 830                  | 0.77                         | 1.4E-03                        | 0.39                           | 0.164                            |
| ETV6    | Ets              | 8588               | 17890                | 0.77                         | 0.016                          | 0.70                           | 0.036                            |
| KLF5    | C2H2 ZF          | 17727              | 53041                | 0.77                         | 0.027                          | 0.64                           | 0.090                            |
| ELK1    | Ets              | 5762               | 6398                 | 0.76                         | 0.027                          | 0.38                           | 0.351                            |
| TFAP2C  | AP-2             | 36011              | 179035               | 0.76                         | 0.017                          | 0.72                           | 0.027                            |
| SPDEF   | Ets              | 6626               | 16827                | 0.76                         | 0.017                          | 0.17                           | 0.666                            |
| SOX9    | HMG/Sox          | 1456               | 2913                 | 0.76                         | 2.5E-04                        | 0.18                           | 0.486                            |
| ZKSCAN1 | C2H2 ZF          | 6049               | 25613                | 0.76                         | 4.2E-03                        | 0.64                           | 0.025                            |
| TP53    | p53              | 18979              | 77748                | 0.76                         | 6.6E-04                        | -0.07                          | 0.792                            |
| RFX2    | RFX              | 5058               | 6595                 | 0.75                         | 3.1E-03                        | 0.49                           | 0.090                            |
| ZFX     | C2H2 ZF          | 32058              | 242180               | 0.75                         | 0.013                          | 0.66                           | 0.038                            |
| THRA    | Nuclear receptor | 124                | 393                  | 0.75                         | 1.3E-03                        | 0.37                           | 0.169                            |
| YY2     | C2H2 ZF          | 3412               | 2289                 | 0.74                         | 9.0E-03                        | 0.01                           | 0.980                            |
| ZNF143  | C2H2 ZF          | 12119              | 41451                | 0.74                         | 2.5E-03                        | 0.20                           | 0.483                            |
| ELK3    | Ets              | 13021              | 39903                | 0.74                         | 0.036                          | 0.45                           | 0.267                            |
| JUN     | bZIP             | 50006              | 273381               | 0.74                         | 0.037                          | 0.09                           | 0.830                            |
| NFE2L2  | bZIP             | 9914               | 28541                | 0.74                         | 0.015                          | 0.42                           | 0.230                            |
| ZNF554  | C2H2 ZF          | 5985               | 17731                | 0.73                         | 0.024                          | 0.45                           | 0.222                            |
| RUNX2   | Runt             | 22329              | 108143               | 0.73                         | 0.061                          | -0.05                          | 0.923                            |
| SIX1    | Homeodomain      | 1189               | 1661                 | 0.73                         | 4.5E-03                        | 0.53                           | 0.065                            |
| ZBTB7B  | C2H2 ZF          | 2962               | 3734                 | 0.73                         | 3.0E-03                        | 0.53                           | 0.050                            |
| ELF4    | Ets              | 4979               | 6745                 | 0.73                         | 0.040                          | 0.74                           | 0.036                            |
| NFKB1   | Rel              | 9655               | 43398                | 0.73                         | 0.011                          | 0.59                           | 0.056                            |
| ARNTL   | bHLH             | 7045               | 11767                | 0.73                         | 2.7E-04                        | 0.21                           | 0.372                            |
| STAT2   | STAT             | 636                | 1462                 | 0.72                         | 5.1E-03                        | 0.58                           | 0.039                            |
| KLF4    | C2H2 ZF          | 27644              | 135494               | 0.72                         | 0.043                          | 0.24                           | 0.569                            |
| ETV7    | Ets              | 3478               | 5305                 | 0.72                         | 0.044                          | 0.41                           | 0.316                            |

| TF      | TF Family        | # Constrained | # Unconstrained | Correlation (Constrained) | p Correlation (Constrained) | Correlation (Unconstrained) | p Correlation (Unconstrained) |
|---------|------------------|---------------|-----------------|---------------------------|-----------------------------|-----------------------------|-------------------------------|
| RXRA    | Nuclear receptor | 19649         | 85156           | 0.72                      | 0.108                       | 0.58                        | 0.232                         |
| RARG    | Nuclear receptor | 1559          | 4572            | 0.72                      | 4.0E-03                     | 0.45                        | 0.104                         |
| TP63    | p53              | 28370         | 229466          | 0.71                      | 2.8E-03                     | -0.04                       | 0.900                         |
| VDR     | Nuclear receptor | 12138         | 57906           | 0.71                      | 2.8E-03                     | 0.54                        | 0.037                         |
| ATOH8   | bHLH             | 170           | 254             | 0.71                      | 9.3E-03                     | 0.03                        | 0.936                         |
| EHF     | Ets              | 10482         | 39662           | 0.71                      | 0.031                       | 0.60                        | 0.090                         |
| ZNF354A | C2H2 ZF          | 18            | 445             | 0.71                      | 1.2E-10                     | 0.54                        | 6.4E-06                       |
| MAFK    | bZIP             | 12247         | 83268           | 0.71                      | 3.2E-03                     | 0.14                        | 0.608                         |
| ZFP28   | C2H2 ZF          | 247           | 2180            | 0.70                      | 3.6E-04                     | 0.61                        | 3.3E-03                       |
| SPI1    | Ets              | 63841         | 759763          | 0.70                      | 0.011                       | 0.48                        | 0.110                         |
| RUNX1   | Runt             | 36078         | 240995          | 0.70                      | 0.081                       | 0.04                        | 0.931                         |
| ZSCAN22 | C2H2 ZF          | 4272          | 9796            | 0.70                      | 0.017                       | 0.69                        | 0.020                         |
| RARA    | Nuclear receptor | 18693         | 70200           | 0.70                      | 0.082                       | 0.46                        | 0.303                         |
| SREBF1  | bHLH             | 1648          | 2428            | 0.70                      | 3.2E-04                     | 0.03                        | 0.902                         |
| KLF12   | C2H2 ZF          | 3346          | 3139            | 0.70                      | 0.017                       | 0.34                        | 0.307                         |
| KLF13   | C2H2 ZF          | 2950          | 3025            | 0.69                      | 0.018                       | 0.33                        | 0.322                         |
| OSR2    | C2H2 ZF          | 4058          | 14834           | 0.69                      | 0.084                       | 0.61                        | 0.143                         |
| ZNF547  | C2H2 ZF          | 171           | 1045            | 0.69                      | 1.0E-03                     | 0.36                        | 0.132                         |
| FOXE1   | Forkhead         | 786           | 1208            | 0.69                      | 0.013                       | 0.27                        | 0.394                         |
| ZIC2    | C2H2 ZF          | 8467          | 27662           | 0.69                      | 6.8E-03                     | 0.44                        | 0.112                         |
| ETV5    | Ets              | 15682         | 56169           | 0.68                      | 0.133                       | 0.55                        | 0.260                         |
| MAX     | bHLH             | 40106         | 207403          | 0.68                      | 0.134                       | 0.70                        | 0.122                         |
| MZF1    | C2H2 ZF          | 1657          | 6380            | 0.68                      | 0.063                       | 0.53                        | 0.177                         |
| SIX2    | Homeodomain      | 15479         | 55040           | 0.68                      | 0.011                       | 0.45                        | 0.125                         |
| ELF3    | Ets; AT hook     | 25119         | 150098          | 0.68                      | 0.045                       | 0.68                        | 0.042                         |
| ELF5    | Ets              | 338           | 312             | 0.68                      | 0.016                       | 0.59                        | 0.045                         |
| TFEB    | bHLH             | 2017          | 4003            | 0.67                      | 0.066                       | 0.39                        | 0.343                         |
| USF2    | bHLH             | 13609         | 55954           | 0.67                      | 0.068                       | 0.34                        | 0.409                         |
| IKZF1   | C2H2 ZF          | 21210         | 155326          | 0.67                      | 0.068                       | 0.72                        | 0.043                         |
| RFX5    | RFX              | 6430          | 12550           | 0.67                      | 0.047                       | 0.57                        | 0.112                         |
| NR1H3   | Nuclear receptor | 4252          | 11810           | 0.67                      | 0.035                       | 0.34                        | 0.339                         |
| ZNF146  | C2H2 ZF          | 1176          | 31923           | 0.66                      | 2.2E-09                     | 0.42                        | 5.1E-04                       |
| SPIB    | Ets              | 7052          | 40304           | 0.66                      | 0.019                       | 0.21                        | 0.514                         |
| NFAT5   | Rel              | 3753          | 13227           | 0.65                      | 0.022                       | 0.58                        | 0.049                         |
| MAFB    | bZIP             | 466           | 903             | 0.64                      | 0.024                       | 0.14                        | 0.660                         |
| MAFF    | bZIP             | 10670         | 61227           | 0.64                      | 0.014                       | 0.00                        | 0.987                         |
| HSF1    | HSF              | 4868          | 39984           | 0.64                      | 0.019                       | 0.75                        | 3.4E-03                       |
| SP2     | C2H2 ZF          | 9624          | 12933           | 0.64                      | 0.124                       | 0.02                        | 0.962                         |
| ZNF8    | C2H2 ZF          | 445           | 7995            | 0.64                      | 2.6E-03                     | 0.31                        | 0.185                         |
| FLI1    | Ets              | 53494         | 261615          | 0.64                      | 0.125                       | 0.51                        | 0.243                         |
| BCL11A  | C2H2 ZF          | 5422          | 14147           | 0.63                      | 0.027                       | 0.27                        | 0.391                         |
| PBX3    | Homeodomain      | 3186          | 8747            | 0.63                      | 0.049                       | 0.46                        | 0.182                         |
| ZNF140  | C2H2 ZF          | 279           | 3591            | 0.63                      | 5.5E-04                     | 0.45                        | 0.021                         |
| ELF1    | Ets              | 26633         | 80769           | 0.63                      | 0.129                       | 0.54                        | 0.207                         |
| FOXM1   | Forkhead         | 8023          | 38048           | 0.63                      | 0.052                       | 0.19                        | 0.601                         |

| TF      | TF Family        | # Constrained | # Unconstrained | Correlation (Constrained) | p Correlation (Constrained) | Correlation (Unconstrained) | p Correlation (Unconstrained) |
|---------|------------------|---------------|-----------------|---------------------------|-----------------------------|-----------------------------|-------------------------------|
| FOS     | bZIP             | 39298         | 160580          | 0.63                      | 0.131                       | 0.18                        | 0.702                         |
| BCL6    | C2H2 ZF          | 11656         | 69462           | 0.63                      | 3.1E-03                     | 0.36                        | 0.122                         |
| JUNB    | bZIP             | 19987         | 96718           | 0.63                      | 0.071                       | 0.43                        | 0.251                         |
| NFE2    | bZIP             | 9434          | 41631           | 0.63                      | 0.039                       | 0.32                        | 0.344                         |
| MNT     | bHLH             | 12192         | 77110           | 0.63                      | 0.183                       | 0.65                        | 0.160                         |
| BACH1   | bZIP             | 7290          | 20126           | 0.63                      | 0.097                       | 0.45                        | 0.264                         |
| MYCN    | bHLH             | 48496         | 328938          | 0.62                      | 0.136                       | 0.22                        | 0.642                         |
| RELA    | Rel              | 22663         | 128758          | 0.62                      | 0.055                       | 0.62                        | 0.058                         |
| TFAP2A  | AP-2             | 22331         | 99119           | 0.62                      | 0.101                       | 0.42                        | 0.298                         |
| RELB    | Rel              | 6755          | 30705           | 0.62                      | 0.057                       | 0.43                        | 0.209                         |
| ZFP64   | C2H2 ZF          | 8602          | 36066           | 0.61                      | 0.027                       | 0.77                        | 2.1E-03                       |
| IRF1    | IRF              | 6506          | 31647           | 0.61                      | 0.012                       | 0.60                        | 0.014                         |
| RFX3    | RFX              | 4335          | 3923            | 0.61                      | 0.021                       | 0.16                        | 0.581                         |
| MAFG    | bZIP             | 4275          | 23808           | 0.61                      | 0.028                       | 0.28                        | 0.350                         |
| PRDM14  | C2H2 ZF          | 5891          | 42493           | 0.60                      | 0.113                       | 0.78                        | 0.023                         |
| ZNF76   | C2H2 ZF          | 3022          | 3429            | 0.60                      | 6.9E-07                     | 0.65                        | 3.7E-08                       |
| ESR2    | Nuclear receptor | 6724          | 24973           | 0.60                      | 0.017                       | 0.40                        | 0.143                         |
| RUNX3   | Runt             | 9871          | 52721           | 0.60                      | 0.153                       | -0.05                       | 0.913                         |
| FOSL2   | bZIP             | 32906         | 120401          | 0.60                      | 0.090                       | 0.36                        | 0.344                         |
| FOSB    | bZIP             | 9444          | 21404           | 0.59                      | 0.124                       | 0.19                        | 0.657                         |
| CDX2    | Homeodomain      | 15509         | 116218          | 0.59                      | 0.044                       | 0.15                        | 0.636                         |
| RFX1    | RFX              | 14904         | 24710           | 0.58                      | 0.028                       | 0.05                        | 0.861                         |
| FOXP1   | Forkhead         | 18096         | 125879          | 0.58                      | 0.099                       | 0.08                        | 0.828                         |
| E2F7    | E2F              | 543           | 652             | 0.58                      | 0.099                       | 0.05                        | 0.901                         |
| ZNF16   | C2H2 ZF          | 41            | 570             | 0.57                      | 2.2E-05                     | 0.61                        | 3.9E-06                       |
| SOX3    | HMG/Sox          | 1691          | 2161            | 0.56                      | 0.145                       | -0.30                       | 0.463                         |
| BATF3   | bZIP             | 1222          | 6853            | 0.56                      | 0.028                       | -0.12                       | 0.669                         |
| WT1     | C2H2 ZF          | 2810          | 7524            | 0.56                      | 0.187                       | 0.66                        | 0.108                         |
| NR2F2   | Nuclear receptor | 28590         | 107858          | 0.56                      | 0.189                       | 0.33                        | 0.470                         |
| XBP1    | bZIP             | 4496          | 17745           | 0.56                      | 0.093                       | -0.73                       | 0.016                         |
| ZIC5    | C2H2 ZF          | 10420         | 28910           | 0.56                      | 0.038                       | 0.34                        | 0.242                         |
| ZNF331  | C2H2 ZF          | 196           | 2213            | 0.55                      | 4.7E-03                     | 0.65                        | 4.3E-04                       |
| MYOG    | bHLH             | 14888         | 45638           | 0.54                      | 0.165                       | -0.42                       | 0.297                         |
| NKX2-1  | Homeodomain      | 19415         | 143548          | 0.54                      | 0.267                       | 0.58                        | 0.230                         |
| HIC1    | C2H2 ZF          | 3255          | 15543           | 0.54                      | 0.211                       | 0.36                        | 0.433                         |
| ZSCAN31 | C2H2 ZF          | 465           | 1300            | 0.54                      | 0.090                       | 0.49                        | 0.126                         |
| LEF1    | HMG/Sox          | 1106          | 2028            | 0.53                      | 0.091                       | 0.15                        | 0.665                         |
| ZBTB48  | C2H2 ZF          | 6346          | 50391           | 0.53                      | 0.221                       | 0.50                        | 0.257                         |
| BACH2   | bZIP             | 4257          | 16463           | 0.53                      | 0.097                       | 0.19                        | 0.577                         |
| BCL6B   | C2H2 ZF          | 269           | 817             | 0.52                      | 0.120                       | 0.31                        | 0.379                         |
| MITF    | bHLH             | 13891         | 77376           | 0.52                      | 0.121                       | 0.08                        | 0.829                         |
| ESRRA   | Nuclear receptor | 11366         | 55434           | 0.52                      | 0.229                       | 0.29                        | 0.522                         |
| ZNF260  | C2H2 ZF          | 205           | 4695            | 0.52                      | 1.0E-05                     | 0.35                        | 5.0E-03                       |
| NFIL3   | bZIP             | 5253          | 34388           | 0.52                      | 0.123                       | -0.10                       | 0.788                         |
| ZNF324  | C2H2 ZF          | 1109          | 4865            | 0.52                      | 0.020                       | 0.21                        | 0.373                         |

| TF      | TF Family            | # Constrained | # Unconstrained | Correlation (Constrained) | p Correlation (Constrained) | Correlation (Unconstrained) | p Correlation (Unconstrained) |
|---------|----------------------|---------------|-----------------|---------------------------|-----------------------------|-----------------------------|-------------------------------|
| PKNOX1  | Homeodomain          | 15147         | 66277           | 0.51                      | 0.160                       | 0.63                        | 0.070                         |
| IRF2    | IRF                  | 5111          | 18367           | 0.51                      | 0.063                       | 0.44                        | 0.118                         |
| ZNF341  | C2H2 ZF              | 6780          | 24796           | 0.51                      | 0.199                       | 0.64                        | 0.087                         |
| NRF1    | Unknown              | 13959         | 30541           | 0.51                      | 0.135                       | -0.14                       | 0.695                         |
| ZNF563  | C2H2 ZF              | 360           | 1879            | 0.50                      | 0.024                       | 0.64                        | 2.2E-03                       |
| NR2F1   | Nuclear receptor     | 17994         | 78770           | 0.49                      | 0.260                       | 0.21                        | 0.650                         |
| MECOM   | C2H2 ZF              | 4762          | 32212           | 0.49                      | 0.324                       | -0.15                       | 0.777                         |
| KLF6    | C2H2 ZF              | 8667          | 15061           | 0.48                      | 0.187                       | -0.07                       | 0.849                         |
| ZNF528  | C2H2 ZF              | 862           | 4763            | 0.48                      | 0.069                       | 0.45                        | 0.095                         |
| STAT5B  | STAT                 | 7463          | 33201           | 0.48                      | 0.159                       | 0.60                        | 0.067                         |
| ZFP82   | C2H2 ZF              | 62            | 359             | 0.48                      | 0.017                       | 0.49                        | 0.016                         |
| NEUROD1 | bHLH                 | 29746         | 77291           | 0.47                      | 0.200                       | -0.44                       | 0.236                         |
| CREM    | bZIP                 | 12782         | 30676           | 0.47                      | 0.292                       | 0.07                        | 0.884                         |
| ZIM3    | C2H2 ZF              | 1563          | 19679           | 0.47                      | 0.051                       | 0.56                        | 0.016                         |
| BATF    | bZIP                 | 7372          | 36800           | 0.46                      | 0.110                       | 0.24                        | 0.434                         |
| ZNF274  | C2H2 ZF              | 294           | 1276            | 0.46                      | 1.2E-04                     | 0.30                        | 0.015                         |
| NR1H4   | Nuclear receptor     | 378           | 1503            | 0.46                      | 0.117                       | 0.31                        | 0.307                         |
| USF1    | bHLH                 | 15270         | 73163           | 0.46                      | 0.256                       | 0.06                        | 0.881                         |
| MLX     | bHLH                 | 4482          | 8323            | 0.45                      | 0.190                       | -0.42                       | 0.222                         |
| ATF7    | bZIP                 | 11604         | 81117           | 0.45                      | 0.190                       | 0.01                        | 0.974                         |
| NR2F6   | Nuclear receptor     | 9388          | 42822           | 0.45                      | 0.122                       | 0.15                        | 0.633                         |
| HOXC9   | Homeodomain          | 6972          | 17289           | 0.45                      | 0.063                       | -0.14                       | 0.581                         |
| ZNF449  | C2H2 ZF              | 2220          | 8690            | 0.44                      | 0.199                       | 0.35                        | 0.317                         |
| HNF4G   | Nuclear receptor     | 5052          | 17988           | 0.44                      | 0.135                       | 0.13                        | 0.681                         |
| ATF2    | bZIP                 | 12197         | 98370           | 0.44                      | 0.206                       | 0.01                        | 0.984                         |
| HLF     | bZIP                 | 3784          | 27607           | 0.44                      | 0.208                       | 0.09                        | 0.812                         |
| SNAI1   | C2H2 ZF              | 1325          | 1826            | 0.43                      | 0.340                       | -0.02                       | 0.963                         |
| ZEB1    | C2H2 ZF; Homeodomain | 16008         | 48033           | 0.43                      | 0.341                       | -0.12                       | 0.797                         |
| HAND2   | bHLH                 | 17581         | 39994           | 0.42                      | 0.294                       | -0.19                       | 0.660                         |
| ZNF322  | C2H2 ZF              | 470           | 3088            | 0.42                      | 0.070                       | 0.27                        | 0.266                         |
| OLIG2   | bHLH                 | 13389         | 22128           | 0.42                      | 0.298                       | 0.07                        | 0.861                         |
| TCF4    | bHLH                 | 33426         | 241897          | 0.41                      | 0.270                       | -0.47                       | 0.204                         |
| FOSL1   | bZIP                 | 19165         | 56083           | 0.41                      | 0.315                       | 0.13                        | 0.751                         |
| DDIT3   | bZIP                 | 3402          | 13460           | 0.41                      | 0.243                       | -0.07                       | 0.843                         |
| RBPJ    | CSL                  | 18963         | 86519           | 0.41                      | 0.318                       | 0.31                        | 0.448                         |
| FOXO3   | Forkhead             | 5384          | 14449           | 0.40                      | 0.281                       | 0.03                        | 0.938                         |
| TEAD1   | TEA                  | 25446         | 160936          | 0.40                      | 0.321                       | 0.17                        | 0.693                         |
| SOX5    | HMG/Sox              | 10525         | 39846           | 0.40                      | 0.282                       | -0.43                       | 0.249                         |
| PHOX2B  | Homeodomain          | 22494         | 169693          | 0.40                      | 0.221                       | -0.16                       | 0.633                         |
| TBX21   | T-box                | 8457          | 48464           | 0.40                      | 0.285                       | -0.20                       | 0.615                         |
| GFI1    | C2H2 ZF              | 3169          | 27725           | 0.40                      | 0.256                       | 0.24                        | 0.505                         |
| ZBTB18  | C2H2 ZF              | 459           | 485             | 0.40                      | 0.291                       | -0.02                       | 0.956                         |
| FOXJ2   | Forkhead             | 415           | 933             | 0.39                      | 0.381                       | 0.24                        | 0.604                         |
| ZNF24   | C2H2 ZF              | 3788          | 45806           | 0.39                      | 0.111                       | 0.34                        | 0.172                         |
| IRF4    | IRF                  | 10101         | 48847           | 0.38                      | 0.180                       | 0.27                        | 0.347                         |

| TF      | TF Family        | # Constrained | # Unconstrained | Correlation (Constrained) | p Correlation (Constrained) | Correlation (Unconstrained) | p Correlation (Unconstrained) |
|---------|------------------|---------------|-----------------|---------------------------|-----------------------------|-----------------------------|-------------------------------|
| NR2C1   | Nuclear receptor | 2526          | 7620            | 0.37                      | 0.464                       | 0.12                        | 0.828                         |
| TBX5    | T-box            | 6603          | 31257           | 0.37                      | 0.193                       | -0.01                       | 0.977                         |
| ZBTB12  | C2H2 ZF          | 543           | 2680            | 0.36                      | 0.336                       | 0.44                        | 0.239                         |
| SNAI2   | C2H2 ZF          | 25087         | 210209          | 0.36                      | 0.425                       | -0.31                       | 0.493                         |
| TFAP4   | bHLH             | 31591         | 105658          | 0.36                      | 0.378                       | -0.28                       | 0.497                         |
| ZNF329  | C2H2 ZF          | 236           | 848             | 0.36                      | 0.062                       | 0.78                        | 9.0E-07                       |
| STAT5A  | STAT             | 2700          | 10408           | 0.35                      | 0.392                       | 0.79                        | 0.021                         |
| NEUROG2 | bHLH             | 33888         | 117939          | 0.35                      | 0.402                       | -0.38                       | 0.353                         |
| ATOH1   | bHLH             | 29035         | 69109           | 0.35                      | 0.363                       | -0.51                       | 0.158                         |
| TWIST1  | bHLH             | 18438         | 31643           | 0.34                      | 0.403                       | -0.38                       | 0.358                         |
| ZNF317  | C2H2 ZF          | 2401          | 21298           | 0.34                      | 0.193                       | 0.00                        | 0.990                         |
| SMAD4   | SMAD             | 1512          | 6806            | 0.34                      | 0.338                       | 0.22                        | 0.543                         |
| PPARG   | Nuclear receptor | 27511         | 180147          | 0.34                      | 0.184                       | 0.19                        | 0.476                         |
| ZNF18   | C2H2 ZF          | 2013          | 11896           | 0.34                      | 0.374                       | -0.04                       | 0.917                         |
| ZNF667  | C2H2 ZF          | 66            | 240             | 0.34                      | 0.158                       | 0.35                        | 0.147                         |
| SOX2    | HMG/Sox          | 31175         | 156883          | 0.33                      | 0.463                       | -0.11                       | 0.821                         |
| NR5A2   | Nuclear receptor | 1658          | 7595            | 0.33                      | 0.383                       | 0.20                        | 0.612                         |
| OTX2    | Homeodomain      | 30199         | 215466          | 0.33                      | 0.429                       | -0.32                       | 0.439                         |
| NR2C2   | Nuclear receptor | 6772          | 27155           | 0.33                      | 0.528                       | 0.22                        | 0.670                         |
| GATA3   | GATA             | 27498         | 232478          | 0.32                      | 0.537                       | -0.15                       | 0.770                         |
| ATF4    | bZIP             | 6920          | 65938           | 0.32                      | 0.371                       | -0.16                       | 0.669                         |
| ZSCAN29 | C2H2 ZF          | 1182          | 4739            | 0.32                      | 0.315                       | 0.09                        | 0.792                         |
| TEAD4   | TEA              | 24535         | 149998          | 0.31                      | 0.455                       | 0.12                        | 0.784                         |
| HNF1B   | Homeodomain      | 6449          | 24482           | 0.31                      | 0.303                       | -0.36                       | 0.224                         |
| ZNF41   | C2H2 ZF          | 119           | 1400            | 0.31                      | 0.243                       | 0.45                        | 0.081                         |
| MAF     | bZIP             | 11639         | 44387           | 0.31                      | 0.330                       | 0.21                        | 0.507                         |
| PBX2    | Homeodomain      | 4572          | 16560           | 0.30                      | 0.394                       | 0.05                        | 0.886                         |
| MEF2D   | MADS box         | 1582          | 3007            | 0.30                      | 0.365                       | -0.35                       | 0.292                         |
| MYOD1   | bHLH             | 64616         | 262043          | 0.30                      | 0.466                       | -0.40                       | 0.322                         |
| HNF1A   | Homeodomain      | 4903          | 15851           | 0.30                      | 0.317                       | -0.26                       | 0.397                         |
| STAT4   | STAT             | 4278          | 19007           | 0.30                      | 0.371                       | 0.55                        | 0.077                         |
| REST    | C2H2 ZF          | 20551         | 72127           | 0.30                      | 0.215                       | 0.19                        | 0.425                         |
| PBX1    | Homeodomain      | 5221          | 19771           | 0.30                      | 0.405                       | 0.06                        | 0.869                         |
| ONECUT2 | CUT; Homeodomain | 22974         | 204370          | 0.29                      | 0.442                       | -0.36                       | 0.345                         |
| TEAD2   | TEA              | 109           | 302             | 0.29                      | 0.274                       | 0.25                        | 0.346                         |
| TCF12   | bHLH             | 29375         | 79650           | 0.29                      | 0.489                       | -0.29                       | 0.481                         |
| STAT3   | STAT             | 23691         | 117049          | 0.29                      | 0.454                       | 0.64                        | 0.065                         |
| AHRR    | bHLH             | 963           | 2306            | 0.29                      | 0.493                       | -0.42                       | 0.294                         |
| PAX5    | Paired box       | 11208         | 53368           | 0.28                      | 0.539                       | 0.04                        | 0.938                         |
| NR1H2   | Nuclear receptor | 2305          | 5336            | 0.28                      | 0.355                       | 0.05                        | 0.877                         |
| ATF3    | bZIP             | 1827          | 2077            | 0.28                      | 0.434                       | -0.31                       | 0.380                         |
| HNF4A   | Nuclear receptor | 27045         | 183783          | 0.28                      | 0.357                       | 0.09                        | 0.770                         |
| ZNF136  | C2H2 ZF          | 9             | 283             | 0.28                      | 0.106                       | 0.39                        | 0.020                         |
| FEZF1   | C2H2 ZF          | 5586          | 24348           | 0.28                      | 0.412                       | 0.46                        | 0.153                         |
| ZNF770  | C2H2 ZF          | 2661          | 54010           | 0.27                      | 0.032                       | 0.81                        | 4.0E-15                       |

| TF      | TF Family        | # Constrained | # Unconstrained | Correlation (Constrained) | p Correlation (Constrained) | Correlation (Unconstrained) | p Correlation (Unconstrained) |
|---------|------------------|---------------|-----------------|---------------------------|-----------------------------|-----------------------------|-------------------------------|
| CREB3L1 | bZIP             | 3407          | 6797            | 0.27                      | 0.425                       | -0.44                       | 0.181                         |
| GATA6   | GATA             | 26993         | 185173          | 0.27                      | 0.521                       | -0.21                       | 0.622                         |
| CREB5   | bZIP             | 4563          | 18328           | 0.27                      | 0.456                       | -0.01                       | 0.985                         |
| STAT6   | STAT             | 595           | 2246            | 0.27                      | 0.404                       | 0.64                        | 0.024                         |
| ZNF250  | C2H2 ZF          | 16            | 1034            | 0.25                      | 0.042                       | 0.45                        | 2.1E-04                       |
| SOX4    | HMG/Sox          | 8560          | 44302           | 0.25                      | 0.582                       | -0.75                       | 0.053                         |
| ZNF257  | C2H2 ZF          | 240           | 957             | 0.25                      | 0.456                       | 0.18                        | 0.597                         |
| ZNF680  | C2H2 ZF          | 708           | 7562            | 0.25                      | 0.351                       | 0.53                        | 0.034                         |
| YY1     | C2H2 ZF          | 36744         | 179897          | 0.25                      | 0.462                       | -0.31                       | 0.360                         |
| HMBOX1  | Homeodomain      | 1750          | 18848           | 0.25                      | 0.593                       | -0.03                       | 0.955                         |
| FO XK2  | Forkhead         | 4176          | 22064           | 0.25                      | 0.637                       | -0.26                       | 0.613                         |
| ZNF549  | C2H2 ZF          | 750           | 4241            | 0.24                      | 0.372                       | 0.25                        | 0.348                         |
| GATA1   | GATA             | 19082         | 168673          | 0.23                      | 0.662                       | -0.09                       | 0.869                         |
| TBX3    | T-box            | 919           | 3286            | 0.23                      | 0.587                       | -0.38                       | 0.349                         |
| PDX1    | Homeodomain      | 14538         | 41390           | 0.22                      | 0.542                       | -0.09                       | 0.806                         |
| MXI1    | bHLH             | 6111          | 11278           | 0.22                      | 0.723                       | -0.44                       | 0.453                         |
| MYC     | bHLH             | 33217         | 193926          | 0.22                      | 0.574                       | -0.35                       | 0.358                         |
| ZNF134  | C2H2 ZF          | 590           | 3823            | 0.21                      | 0.442                       | 0.07                        | 0.806                         |
| FOXA3   | Forkhead         | 9126          | 48328           | 0.21                      | 0.622                       | -0.03                       | 0.945                         |
| E2F4    | E2F              | 7435          | 12549           | 0.20                      | 0.631                       | -0.02                       | 0.960                         |
| ZNF816  | C2H2 ZF          | 186           | 1667            | 0.19                      | 0.474                       | -0.04                       | 0.873                         |
| GATA2   | GATA             | 32383         | 251835          | 0.18                      | 0.727                       | -0.25                       | 0.638                         |
| CLOCK   | bHLH             | 3100          | 7089            | 0.18                      | 0.694                       | -0.36                       | 0.433                         |
| BHLHE40 | bHLH             | 12105         | 46740           | 0.18                      | 0.697                       | -0.21                       | 0.658                         |
| NR3C1   | Nuclear receptor | 29283         | 190610          | 0.18                      | 0.520                       | -0.22                       | 0.439                         |
| JUND    | bZIP             | 30938         | 123695          | 0.18                      | 0.701                       | -0.07                       | 0.886                         |
| ATF1    | bZIP             | 8689          | 21316           | 0.18                      | 0.651                       | -0.54                       | 0.131                         |
| ZNF350  | C2H2 ZF          | 435           | 2063            | 0.17                      | 0.521                       | 0.09                        | 0.734                         |
| SOX17   | HMG/Sox          | 6556          | 34539           | 0.17                      | 0.686                       | -0.60                       | 0.119                         |
| NR4A1   | Nuclear receptor | 5277          | 20650           | 0.17                      | 0.689                       | 0.49                        | 0.217                         |
| TAL1    | bHLH             | 18339         | 118897          | 0.16                      | 0.724                       | -0.23                       | 0.620                         |
| HOXA9   | Homeodomain      | 690           | 2354            | 0.16                      | 0.652                       | -0.12                       | 0.749                         |
| PGR     | Nuclear receptor | 28299         | 219287          | 0.15                      | 0.586                       | -0.18                       | 0.513                         |
| STAT1   | STAT             | 6853          | 23854           | 0.15                      | 0.695                       | 0.63                        | 0.069                         |
| GATA4   | GATA             | 29197         | 272128          | 0.15                      | 0.745                       | -0.20                       | 0.670                         |
| ZBTB6   | C2H2 ZF          | 3496          | 14395           | 0.14                      | 0.668                       | 0.25                        | 0.438                         |
| CEBPD   | bZIP             | 5597          | 26061           | 0.12                      | 0.733                       | -0.35                       | 0.315                         |
| ZNF121  | C2H2 ZF          | 1015          | 37591           | 0.12                      | 0.334                       | 0.55                        | 3.8E-06                       |
| SCRT2   | C2H2 ZF          | 5367          | 28488           | 0.12                      | 0.738                       | -0.51                       | 0.136                         |
| SCRT1   | C2H2 ZF          | 9604          | 77265           | 0.11                      | 0.786                       | -0.38                       | 0.319                         |
| MEIS1   | Homeodomain      | 3974          | 13343           | 0.10                      | 0.792                       | -0.05                       | 0.895                         |
| FOXA2   | Forkhead         | 77920         | 730071          | 0.10                      | 0.811                       | 0.02                        | 0.970                         |
| TBP     | TBP              | 5429          | 36543           | 0.10                      | 0.819                       | 0.17                        | 0.681                         |
| HOXB13  | Homeodomain      | 34736         | 275861          | 0.10                      | 0.804                       | 0.06                        | 0.888                         |
| FOXA1   | Forkhead         | 64001         | 718656          | 0.09                      | 0.797                       | 0.10                        | 0.785                         |

| TF     | TF Family               | # Constrained | # Unconstrained | Correlation (Constrained) | p Correlation (Constrained) | Correlation (Unconstrained) | p Correlation (Unconstrained) |
|--------|-------------------------|---------------|-----------------|---------------------------|-----------------------------|-----------------------------|-------------------------------|
| ZBTB26 | C2H2 ZF                 | 4058          | 5989            | 0.08                      | 0.861                       | -0.17                       | 0.713                         |
| E2F6   | E2F                     | 13829         | 37067           | 0.07                      | 0.871                       | 0.10                        | 0.822                         |
| CREB1  | bZIP                    | 38466         | 134004          | 0.07                      | 0.915                       | -0.49                       | 0.408                         |
| TCF7L2 | HMG/Sox                 | 12865         | 54211           | 0.06                      | 0.876                       | -0.05                       | 0.904                         |
| EOMES  | T-box                   | 4537          | 21633           | 0.02                      | 0.951                       | -0.68                       | 0.046                         |
| PITX3  | Homeodomain             | 7130          | 26201           | 0.02                      | 0.960                       | -0.20                       | 0.666                         |
| AHR    | bHLH                    | 9004          | 30993           | 0.02                      | 0.964                       | -0.40                       | 0.372                         |
| ZNF490 | C2H2 ZF                 | 922           | 12335           | 0.02                      | 0.881                       | 0.34                        | 0.012                         |
| MEF2C  | MADS box                | 1636          | 4062            | 0.02                      | 0.957                       | -0.40                       | 0.250                         |
| PAX6   | Homeodomain; Paired box | 1495          | 2934            | 0.02                      | 0.944                       | -0.33                       | 0.201                         |
| AR     | Nuclear receptor        | 45728         | 453586          | 0.01                      | 0.985                       | -0.47                       | 0.352                         |
| NKX3-1 | Homeodomain             | 2540          | 19613           | 0.00                      | 0.995                       | -0.06                       | 0.878                         |
| CEBPG  | bZIP                    | 11235         | 110717          | 0.00                      | 0.994                       | -0.36                       | 0.309                         |
| DUX4   | Homeodomain             | 20636         | 258936          | 0.00                      | 0.993                       | -0.05                       | 0.884                         |
| ZNF708 | C2H2 ZF                 | 193           | 634             | 0.00                      | 0.991                       | 0.24                        | 0.475                         |
| NKX2-5 | Homeodomain             | 3000          | 12640           | -0.01                     | 0.974                       | -0.09                       | 0.691                         |
| TCF7L1 | HMG/Sox                 | 6624          | 24551           | -0.01                     | 0.983                       | 0.07                        | 0.865                         |
| FOXP2  | Forkhead                | 2310          | 4143            | -0.02                     | 0.972                       | -0.51                       | 0.239                         |
| ZNF418 | C2H2 ZF                 | 57            | 318             | -0.02                     | 0.915                       | 0.01                        | 0.947                         |
| MEF2B  | MADS box                | 10844         | 34212           | -0.02                     | 0.951                       | -0.33                       | 0.350                         |
| FOXO1  | Forkhead                | 8254          | 33056           | -0.03                     | 0.955                       | 0.32                        | 0.487                         |
| POU5F1 | Homeodomain; POU        | 14372         | 74816           | -0.06                     | 0.839                       | -0.55                       | 0.028                         |
| NANOG  | Homeodomain             | 19172         | 78100           | -0.07                     | 0.807                       | -0.42                       | 0.104                         |
| KLF16  | C2H2 ZF                 | 1670          | 1842            | -0.08                     | 0.887                       | -0.31                       | 0.550                         |
| MYNN   | C2H2 ZF                 | 2437          | 10041           | -0.08                     | 0.768                       | -0.24                       | 0.377                         |
| CEBPB  | bZIP                    | 58732         | 788738          | -0.09                     | 0.818                       | -0.23                       | 0.548                         |
| ARNT   | bHLH                    | 8573          | 27846           | -0.11                     | 0.855                       | -0.35                       | 0.562                         |
| MEF2A  | MADS box                | 5083          | 14186           | -0.13                     | 0.729                       | -0.40                       | 0.249                         |
| TFDP1  | E2F                     | 5692          | 8865            | -0.14                     | 0.771                       | -0.19                       | 0.687                         |
| MYB    | Myb/SANT                | 16240         | 111913          | -0.15                     | 0.751                       | -0.04                       | 0.935                         |
| ASCL1  | bHLH                    | 25692         | 69797           | -0.18                     | 0.693                       | -0.52                       | 0.232                         |
| EPAS1  | bHLH                    | 5213          | 11401           | -0.19                     | 0.763                       | -0.67                       | 0.219                         |
| PRDM1  | C2H2 ZF                 | 3342          | 30879           | -0.22                     | 0.549                       | -0.28                       | 0.426                         |
| TCF3   | bHLH                    | 20554         | 73536           | -0.22                     | 0.674                       | -0.32                       | 0.538                         |
| CEBPA  | bZIP                    | 27674         | 270376          | -0.25                     | 0.492                       | -0.29                       | 0.413                         |
| ZNF263 | C2H2 ZF                 | 9023          | 64556           | -0.25                     | 0.582                       | -0.10                       | 0.838                         |
| ZNF382 | C2H2 ZF                 | 4655          | 49686           | -0.26                     | 0.322                       | -0.35                       | 0.168                         |
| FOKK1  | Forkhead                | 1514          | 2030            | -0.26                     | 0.580                       | -0.23                       | 0.618                         |
| MEIS2  | Homeodomain             | 8024          | 36598           | -0.27                     | 0.666                       | -0.62                       | 0.268                         |
| HOXA13 | Homeodomain             | 923           | 3255            | -0.33                     | 0.389                       | -0.17                       | 0.671                         |
| GFI1B  | C2H2 ZF                 | 2169          | 7668            | -0.33                     | 0.424                       | -0.11                       | 0.801                         |
| ZNF85  | C2H2 ZF                 | 194           | 1282            | -0.33                     | 6.9E-03                     | 0.05                        | 0.712                         |
| ZNF586 | C2H2 ZF                 | 67            | 3886            | -0.35                     | 4.0E-03                     | 0.48                        | 6.2E-05                       |
| FOXH1  | Forkhead                | 3686          | 29192           | -0.37                     | 0.372                       | -0.32                       | 0.439                         |
| SOX13  | HMG/Sox                 | 8759          | 53503           | -0.42                     | 0.305                       | 0.22                        | 0.604                         |

| TF   | TF Family               | # Constrained | # Unconstrained | Correlation (Constrained) | p Correlation (Constrained) | Correlation (Unconstrained) | p Correlation (Unconstrained) |
|------|-------------------------|---------------|-----------------|---------------------------|-----------------------------|-----------------------------|-------------------------------|
| E2F1 | E2F                     | 16895         | 48151           | -0.45                     | 0.375                       | -0.44                       | 0.378                         |
| PAX7 | Homeodomain; Paired box | 2172          | 6725            | -0.50                     | 0.167                       | -0.39                       | 0.300                         |
| EN1  | Homeodomain             | 5534          | 17148           | -0.52                     | 0.290                       | -0.67                       | 0.144                         |
| TCF7 | HMG/Sox                 | 3449          | 11608           | -0.63                     | 0.127                       | -0.95                       | 1.1E-03                       |
| PAX3 | Homeodomain; Paired box | 12830         | 70494           | -0.67                     | 0.048                       | -0.28                       | 0.460                         |
| LHX2 | Homeodomain             | 1089          | 1870            | -0.72                     | 0.067                       | -0.70                       | 0.080                         |
| LHX9 | Homeodomain             | 2986          | 6773            | -0.74                     | 0.093                       | -0.66                       | 0.154                         |
| ISL1 | Homeodomain             | 10625         | 26540           | NA                        | NA                          | -0.03                       | 0.964                         |

**Table S8.**  
**Transcription factor binding sites for 367 transcription factors were categorized as constrained or unconstrained.** We used a two-component Gaussian mixture model to classify sites as constrained or unconstrained using convolutional neural networks and publicly available ChIP-seq data for over 600 ENCODE3 chromatin immunoprecipitation experiments spanning hundreds of cell and tissue types.



| Annotation type     | Name                     | Date accessed | Details                                                                                                                                                                  | Link                                                                                                                                                              |
|---------------------|--------------------------|---------------|--------------------------------------------------------------------------------------------------------------------------------------------------------------------------|-------------------------------------------------------------------------------------------------------------------------------------------------------------------|
| Coding regions      | GENCODE v37              | 21.05.2021    | UTRs and exons for all protein-coding genes                                                                                                                              | <a href="https://www.gencodegenes.org/human/release_37.html">https://www.gencodegenes.org/human/release_37.html</a>                                               |
|                     |                          |               | Promoters (TSS +/- 1kb)                                                                                                                                                  | Manually calculated from each TSS                                                                                                                                 |
| Regulatory features | ENCODE3 cCREs            | 03.06.2021    | candidate <i>cis</i> -regulatory elements, including promoter-like signatures (PLS), proximal enhancer-like signatures (pELS) and distal enhancer-like signatures (dELS) | <a href="https://screen.encodeproject.org/">https://screen.encodeproject.org/</a>                                                                                 |
|                     | ENCODE3 DHS              | 03.06.2021    | DNase hypersensitive sites in 243 cell lines                                                                                                                             | <a href="https://doi.org/10.1038/s41586-020-2528-x">https://doi.org/10.1038/s41586-020-2528-x</a>                                                                 |
|                     | ENCODE3 ChIA-PET anchors | 03.06.2021    | Chromatin loop anchors identified in 24 cell types                                                                                                                       | <a href="https://doi.org/10.1038/s41586-020-2151-x">https://doi.org/10.1038/s41586-020-2151-x</a>                                                                 |
|                     | UCSC Promoters           | 20.08.2021    | Experimentally validated promoters generated by the Eukaryotic Promoter Database.                                                                                        | <a href="https://genome.ucsc.edu/cgi-bin/hgTrackUi?db=mm10&amp;c=chrX&amp;g=epdNew">https://genome.ucsc.edu/cgi-bin/hgTrackUi?db=mm10&amp;c=chrX&amp;g=epdNew</a> |
|                     | Human promoter_Villar    | 20.08.2021    | Promoters active in human liver                                                                                                                                          | <a href="https://doi.org/10.1016/j.cell.2015.01.006">https://doi.org/10.1016/j.cell.2015.01.006</a>                                                               |
|                     | Enhancer_Andersson       | 20.08.2021    | Atlas of active enhancers across human cell types and tissues                                                                                                            | <a href="https://doi.org/10.1038/nature12787">https://doi.org/10.1038/nature12787</a>                                                                             |
|                     | Enhancer_Hoffman         | 20.08.2021    | Enhancers identified from ENCODE data                                                                                                                                    | <a href="https://doi.org/10.1093/nar/gks1284">https://doi.org/10.1093/nar/gks1284</a>                                                                             |
|                     | Human Enhancer_Villar    | 20.08.2021    | Enhancers active in human liver                                                                                                                                          | <a href="https://doi.org/10.1016/j.cell.2015.01.006">https://doi.org/10.1016/j.cell.2015.01.006</a>                                                               |
|                     | SuperEnhancer_Hnisz      | 20.08.2021    | Catalog of super-enhancers in 86 human cell and tissue types                                                                                                             | <a href="https://doi.org/10.1016/j.cell.2013.09.053">https://doi.org/10.1016/j.cell.2013.09.053</a>                                                               |

**Table S9.**  
**Annotation sources used for identifying genomic regions outside of annotations when defining UNICORNs.**

| Element      | TE Family  | Autonomy       | Library Consensus Length (bp) | Species Involved                    | Full-Length Hits |
|--------------|------------|----------------|-------------------------------|-------------------------------------|------------------|
| HysCri-1.134 | hAT        | Non-autonomous | 192                           | <i>Heterocephalus glaber</i>        | 303              |
|              |            |                |                               | <i>Hystrix cristata</i>             | 257              |
| nhAT2_ML     | hAT        | Non-autonomous | 204                           | <i>Cheirogaleus medius</i>          | 91               |
|              |            |                |                               | <i>Nycticebus coucang</i>           | 439              |
| NycCou-1.114 | hAT        | Non-autonomous | 215                           | <i>Nycticebus coucang</i>           | 123              |
| PMER1        | hAT        | Non-autonomous | 90                            | <i>Otolemur garnettii</i>           | 1857             |
| npiggy1_Mm   | PiggyBac   | Non-autonomous | 240                           | <i>Microcebus murinus</i>           | 890              |
|              |            |                |                               | <i>Mirza coquereli</i>              | 518              |
| ScaAqu-1.134 | PiggyBac   | Non-autonomous | 520                           | <i>Scalopus aquaticus</i>           | 453              |
| ScaAqu-1.148 | PiggyBac   | Non-autonomous | 240                           | <i>Scalopus aquaticus</i>           | 143              |
| ScaAqu-1.172 | PiggyBac   | Non-autonomous | 517                           | <i>Scalopus aquaticus</i>           | 225              |
| HipAmp-1.103 | Tc-Mariner | Non-autonomous | 966                           | <i>Hippopotamus amphibius</i>       | 368              |
|              |            |                |                               | <i>Balaenoptera acutorostrata</i>   | 985              |
|              |            |                |                               | <i>Balaenoptera bonaerensis</i>     | 398              |
|              |            |                |                               | <i>Delphinapterus leucas</i>        | 922              |
|              |            |                |                               | <i>Eschrichtius robustus</i>        | 524              |
|              |            |                |                               | <i>Eubalaena japonica</i>           | 511              |
|              |            |                |                               | <i>Hippopotamus amphibius</i>       | 332              |
|              |            |                |                               | <i>Inia geoffrensis</i>             | 483              |
|              |            |                |                               | <i>Kogia breviceps</i>              | 477              |
|              |            |                |                               | <i>Lipotes vexillifer</i>           | 728              |
|              |            |                |                               | <i>Mesoplodon bidens</i>            | 490              |
|              |            |                |                               | <i>Monodon monoceros</i>            | 516              |
|              |            |                |                               | <i>Neophocaena asiaeorientalis</i>  | 820              |
|              |            |                |                               | <i>Orcinus orca</i>                 | 875              |
|              |            |                |                               | <i>Phocoena phocoena</i>            | 521              |
|              |            |                |                               | <i>Platanista gangetica</i>         | 484              |
|              |            |                |                               | <i>Pontoporia blainvillei</i>       | 277              |
|              |            |                |                               | <i>Tursiops truncatus</i>           | 688              |
|              |            |                |                               | <i>Ziphius cavirostris</i>          | 464              |
|              |            |                |                               | <i>Cheirogaleus medius</i>          | 170              |
|              |            |                |                               | <i>Daubentonia madagascariensis</i> | 413              |
|              |            |                |                               | <i>Eulemur flavifrons</i>           | 168              |
|              |            |                |                               | <i>Eulemur fulvus</i>               | 192              |
|              |            |                |                               | <i>Indri indri</i>                  | 220              |
|              |            |                |                               | <i>Lemur catta</i>                  | 168              |
|              |            |                |                               | <i>Microcebus murinus</i>           | 117              |
|              |            |                |                               | <i>Mirza coquereli</i>              | 127              |
|              |            |                |                               | <i>Propithecus coquereli</i>        | 164              |
| OdoVir-5.847 | Tc-Mariner | Autonomous     | 1283                          |                                     |                  |
| ProCoq-1.279 | Tc-Mariner | Non-autonomous | 131                           |                                     |                  |

**Table S10.**

**Putative horizontally transferred transposable elements involving non-chiropterans.**

Outside of bats, we found 11 instances of potential TE introduction through horizontal transfer (transfer from one species to another in the absence of reproduction). In contrast, in bats, we identified 222 putative horizontal transfers, including Tc-Mariner, hAT, and piggyBac elements.

| Human Phenotype                                     | Rank | Hyper raw P-value | Hyper FDR Q-value | Hyper fold enrichment | Hyper fore-ground regions | Hyper total regions | Hyper region set coverage | Hyper fore-ground genes hit | Total genes annotated |
|-----------------------------------------------------|------|-------------------|-------------------|-----------------------|---------------------------|---------------------|---------------------------|-----------------------------|-----------------------|
| Moderate visual impairment                          | 1    | 1.51E-12          | 1.01E-08          | 5.606                 | 26                        | 171                 | 0.00193                   | 2                           | 2                     |
| Ambiguous genitalia, male                           | 2    | 1.67E-11          | 5.56E-08          | 3.478                 | 40                        | 424                 | 0.00297                   | 5                           | 7                     |
| Vitelliform-like macular lesions                    | 3    | 2.52E-11          | 5.60E-08          | 4.786                 | 27                        | 208                 | 0.00200                   | 3                           | 3                     |
| Hyperpigmentation of the fundus                     | 5    | 7.48E-11          | 9.98E-08          | 4.567                 | 27                        | 218                 | 0.00200                   | 2                           | 3                     |
| Failure to thrive secondary to recurrent infections | 6    | 8.70E-11          | 9.67E-08          | 5.086                 | 24                        | 174                 | 0.00178                   | 2                           | 3                     |
| Calcinosis                                          | 7    | 1.54E-10          | 1.47E-07          | 4.425                 | 27                        | 225                 | 0.00200                   | 2                           | 4                     |
| Methylmalonic aciduria                              | 8    | 1.57E-10          | 1.31E-07          | 2.567                 | 58                        | 833                 | 0.00430                   | 6                           | 14                    |
| Calf muscle hypertrophy                             | 9    | 1.69E-10          | 1.25E-07          | 2.789                 | 50                        | 661                 | 0.00371                   | 6                           | 13                    |
| Recurrent opportunistic infections                  | 10   | 1.78E-10          | 1.19E-07          | 4.916                 | 24                        | 180                 | 0.00178                   | 2                           | 4                     |
| Forehead hyperpigmentation                          | 11   | 2.71E-10          | 1.65E-07          | 7.043                 | 17                        | 89                  | 0.00126                   | 1                           | 1                     |
| Posterior wedging of vertebral bodies               | 11   | 2.71E-10          | 1.65E-07          | 7.043                 | 17                        | 89                  | 0.00126                   | 1                           | 1                     |
| High iliac wings                                    | 11   | 2.71E-10          | 1.65E-07          | 7.043                 | 17                        | 89                  | 0.00126                   | 1                           | 1                     |
| Spontaneous abortion                                | 14   | 3.26E-10          | 1.55E-07          | 3.541                 | 34                        | 354                 | 0.00252                   | 3                           | 4                     |
| Muscle hypertrophy of the lower extremities         | 15   | 4.44E-10          | 1.97E-07          | 2.711                 | 50                        | 680                 | 0.00371                   | 6                           | 14                    |
| Impaired social interactions                        | 16   | 1.04E-09          | 4.34E-07          | 2.160                 | 75                        | 1280                | 0.00556                   | 10                          | 28                    |
| Reticular pigmentary degeneration                   | 17   | 1.10E-09          | 4.31E-07          | 5.696                 | 19                        | 123                 | 0.00141                   | 1                           | 1                     |
| Diaphyseal cortical sclerosis                       | 18   | 2.72E-09          | 1.01E-06          | 7.091                 | 15                        | 78                  | 0.00111                   | 1                           | 1                     |
| Quadriceps muscle atrophy                           | 18   | 2.72E-09          | 1.01E-06          | 7.091                 | 15                        | 78                  | 0.00111                   | 1                           | 1                     |
| Exaggerated startle response                        | 20   | 2.81E-09          | 9.37E-07          | 2.796                 | 43                        | 567                 | 0.00319                   | 7                           | 11                    |
| Short stepped shuffling gait                        | 21   | 4.17E-09          | 1.32E-06          | 4.214                 | 24                        | 210                 | 0.00178                   | 2                           | 3                     |
| Methylmalonic acidemia                              | 22   | 4.53E-09          | 1.37E-06          | 2.790                 | 42                        | 555                 | 0.00312                   | 5                           | 10                    |
| Abnormal social behavior                            | 23   | 1.13E-08          | 3.29E-06          | 2.041                 | 75                        | 1355                | 0.00556                   | 10                          | 29                    |
| Short diaphyses                                     | 24   | 1.76E-08          | 4.90E-06          | 5.784                 | 16                        | 102                 | 0.00119                   | 1                           | 1                     |
| Severe hydrops fetalis                              | 24   | 1.76E-08          | 4.90E-06          | 5.784                 | 16                        | 102                 | 0.00119                   | 1                           | 1                     |
| Anterior rib punctate calcifications                | 24   | 1.76E-08          | 4.90E-06          | 5.784                 | 16                        | 102                 | 0.00119                   | 1                           | 1                     |
| Sternal punctate calcifications                     | 24   | 1.76E-08          | 4.90E-06          | 5.784                 | 16                        | 102                 | 0.00119                   | 1                           | 1                     |
| Punctate vertebral calcifications                   | 24   | 1.76E-08          | 4.90E-06          | 5.784                 | 16                        | 102                 | 0.00119                   | 1                           | 2                     |
| Abnormality of the vertebral spinous processes      | 24   | 1.76E-08          | 4.90E-06          | 5.784                 | 16                        | 102                 | 0.00119                   | 1                           | 1                     |
| Short 3rd metacarpal                                | 24   | 1.76E-08          | 4.90E-06          | 5.784                 | 16                        | 102                 | 0.00119                   | 1                           | 2                     |
| Patchy variation in bone mineral density            | 24   | 1.76E-08          | 4.90E-06          | 5.784                 | 16                        | 102                 | 0.00119                   | 1                           | 1                     |
| Calcinosis cutis                                    | 24   | 1.76E-08          | 4.90E-06          | 5.784                 | 16                        | 102                 | 0.00119                   | 1                           | 1                     |
| Hamartoma of tongue                                 | 33   | 2.24E-08          | 4.54E-06          | 4.766                 | 19                        | 147                 | 0.00141                   | 3                           | 4                     |
| Long clavicles                                      | 34   | 2.87E-08          | 5.64E-06          | 2.518                 | 45                        | 659                 | 0.00334                   | 6                           | 8                     |
| Radial club hand                                    | 35   | 4.11E-08          | 7.83E-06          | 8.630                 | 11                        | 47                  | 0.00082                   | 1                           | 2                     |
| Poor eye contact                                    | 36   | 5.90E-08          | 1.09E-05          | 2.128                 | 61                        | 1057                | 0.00452                   | 8                           | 22                    |
| Stippled chondral calcification                     | 37   | 6.39E-08          | 1.15E-05          | 4.975                 | 17                        | 126                 | 0.00126                   | 2                           | 2                     |
| Intermittent hyperpnea at rest                      | 38   | 6.85E-08          | 1.20E-05          | 5.267                 | 16                        | 112                 | 0.00119                   | 1                           | 1                     |
| Renal aminoaciduria                                 | 38   | 6.85E-08          | 1.20E-05          | 5.267                 | 16                        | 112                 | 0.00119                   | 1                           | 1                     |
| Absent toenail                                      | 40   | 8.72E-08          | 1.45E-05          | 2.942                 | 32                        | 401                 | 0.00237                   | 3                           | 5                     |
| Hypoplastic areola                                  | 41   | 1.01E-07          | 1.64E-05          | 3.465                 | 25                        | 266                 | 0.00185                   | 1                           | 1                     |
| Abnormal rib ossification                           | 43   | 1.34E-07          | 2.07E-05          | 2.946                 | 31                        | 388                 | 0.00230                   | 3                           | 5                     |
| Biliary cirrhosis                                   | 44   | 1.62E-07          | 2.45E-05          | 3.872                 | 21                        | 200                 | 0.00156                   | 2                           | 5                     |

| Human Phenotype                        | Rank | Hyper raw P-value | Hyper FDR Q-value | Hyper fold enrichment | Hyper fore-ground regions | Hyper total regions | Hyper region set coverage | Hyper fore-ground genes hit | Total genes annotated |
|----------------------------------------|------|-------------------|-------------------|-----------------------|---------------------------|---------------------|---------------------------|-----------------------------|-----------------------|
| Brushfield spots                       | 45   | 1.77E-07          | 2.63E-05          | 4.643                 | 17                        | 135                 | 0.00126                   | 2                           | 4                     |
| Intrahepatic biliary dysgenesis        | 45   | 1.77E-07          | 2.63E-05          | 4.643                 | 17                        | 135                 | 0.00126                   | 2                           | 3                     |
| Unilateral narrow palpebral fissure    | 47   | 1.81E-07          | 2.58E-05          | 2.700                 | 35                        | 478                 | 0.00260                   | 2                           | 2                     |
| Decreased methylcobalamin              | 48   | 2.09E-07          | 2.91E-05          | 2.778                 | 33                        | 438                 | 0.00245                   | 3                           | 6                     |
| Decreased methionine synthase activity | 48   | 2.09E-07          | 2.91E-05          | 2.778                 | 33                        | 438                 | 0.00245                   | 3                           | 6                     |
| Calcific stippling                     | 50   | 2.34E-07          | 3.12E-05          | 3.944                 | 20                        | 187                 | 0.00148                   | 3                           | 4                     |
| Enuresis nocturna                      | 51   | 2.68E-07          | 3.51E-05          | 3.292                 | 25                        | 280                 | 0.00185                   | 1                           | 2                     |
| Scleroderma                            | 52   | 2.90E-07          | 3.72E-05          | 3.605                 | 22                        | 225                 | 0.00163                   | 3                           | 4                     |

**Table S11.**

**Top 50 gene sets enriched for genes near primate-specific, transposable element-derived CTCF TFBS.** Enrichment analysis of cis-regulatory regions with GREAT.

| Order           | Species                               | olfactory receptor genes |                |       | # Olfactory Turbinals | assembly         | BUSCO % complete | contig N50 | scaffold N50 |
|-----------------|---------------------------------------|--------------------------|----------------|-------|-----------------------|------------------|------------------|------------|--------------|
|                 |                                       | functional               | non-functional | total |                       |                  |                  |            |              |
| Afrosoricida    | <i>Echinops telfairi</i>              | 822                      | 556            | 1378  | -                     | GCF_000313985.1  | 90%              | 20428      | 45764842     |
| Afrosoricida    | <i>Chrysochloris asiatica</i>         | 879                      | 756            | 1635  | -                     | GCA_004027935.1  | 96%              | 6444       | 6492         |
| Afrosoricida    | <i>Microgale talazaci</i>             | 886                      | 770            | 1656  | -                     | GCA_004026705.1  | 64%              | 56946      | 65143        |
| Hyracoidea      | <i>Procavia capensis</i>              | 658                      | 724            | 1382  | 14                    | GCA_004026925.1  | 94%              | 37294      | 39432        |
| Hyracoidea      | <i>Heterohyrax brucei</i>             | 661                      | 806            | 1467  | -                     | GCA_004026845.1  | 77%              | 62841      | 67904        |
| Macroscelidae   | <i>Elephantulus edwardii</i>          | 670                      | 484            | 1154  | -                     | GCA_004027355.1  | 95%              | 16488      | 17713        |
| Proboscidae     | <i>Loxodonta africana</i>             | 1765                     | 2434           | 4199  | 52                    | GCF_000001905.1  | 93%              | 46401353   | 69023        |
| Sirenia         | <i>Trichechus manatus latirostris</i> | 470                      | 755            | 1225  | 10                    | GCF_000243295.1  | 94%              | 37750      | 14442683     |
| Tubulidentata   | <i>Orycteropus afer afer</i>          | 1033                     | 1228           | 2261  | -                     | GCA_004365145.1  | 94%              | 20354      | 22965        |
| Cetartiodactyla | <i>Camelus ferus</i>                  | 468                      | 499            | 967   | 36                    | GCF_000311805.1  | 96%              | 2005940    | 90263        |
| Cetartiodactyla | <i>Camelus dromedarius</i>            | 499                      | 494            | 993   | 36                    | GCF_000767585.1  | 96%              | 4188677    | 69131        |
| Cetartiodactyla | <i>Camelus bactrianus</i>             | 491                      | 528            | 1019  | -                     | GCF_000767855.1  | 94%              | 139019     | 8812066      |
| Cetartiodactyla | <i>Saiga tatarica</i>                 | 428                      | 610            | 1038  | -                     | GCA_004024985.1  | 29%              | 6406       | 6453         |
| Cetartiodactyla | <i>Vicugna pacos huacaya</i>          | 527                      | 555            | 1082  | -                     | GCA_000767525.1  | 95%              | 213649     | 5303709      |
| Cetartiodactyla | <i>Giraffa tippelskirchi</i>          | 570                      | 668            | 1238  | -                     | GCA_001651235.1  | 86%              | 47894      | 212164       |
| Cetartiodactyla | <i>Beatragus hunteri</i>              | 607                      | 764            | 1371  | -                     | GCA_004027495.1  | 76%              | 57444      | 69303        |
| Cetartiodactyla | <i>Okapia johnstoni</i>               | 586                      | 787            | 1373  | -                     | GCA_001660835.1  | 90%              | 39571      | 111538       |
| Cetartiodactyla | <i>Antilocapra americana</i>          | 613                      | 785            | 1398  | -                     | GCA_004027515.1  | 96%              | 59271      | 70316        |
| Cetartiodactyla | <i>Ovis canadensis canadensis</i>     | 639                      | 815            | 1454  | -                     | GCA_004026945.1  | 77%              | 55973      | 69397        |
| Cetartiodactyla | <i>Hemitragus hylocrius</i>           | 663                      | 792            | 1455  | -                     | GCA_004026825.1  | 80%              | 66552      | 85340        |
| Cetartiodactyla | <i>Ovis aries</i>                     | 714                      | 742            | 1456  | 36                    | GCF_000298735.2  | 96%              | 100009711  | 150472       |
| Cetartiodactyla | <i>Pantholops hodgsonii</i>           | 609                      | 859            | 1468  | -                     | GCF_000400835.1  | 91%              | 18674      | 2772860      |
| Cetartiodactyla | <i>Bos indicus</i>                    | 735                      | 741            | 1476  | -                     | GCA_000247795.2  | 94%              | 28375      | 106310653    |
| Cetartiodactyla | <i>Catagonus wagneri</i>              | 696                      | 826            | 1522  | -                     | GCA_004024745.1  | 96%              | 66027      | 91723        |
| Cetartiodactyla | <i>Capra hircus</i>                   | 780                      | 793            | 1573  | 34                    | GCF_001704415.1  | 96%              | 26244591   | 87277232     |
| Cetartiodactyla | <i>Ammotragus lervia</i>              | 740                      | 868            | 1608  | -                     | GCA_002201775.1  | 95%              | 52017      | 1301762      |
| Cetartiodactyla | <i>Moschus moschiferus</i>            | 676                      | 946            | 1622  | -                     | GCA_004024705.1  | 94%              | 34798      | 47482        |
| Cetartiodactyla | <i>Capra aegagrus</i>                 | 764                      | 895            | 1659  | -                     | GCA_000978405.1  | 95%              | 91317560   | 19347        |
| Cetartiodactyla | <i>Odocoileus virginianus texanus</i> | 763                      | 924            | 1687  | -                     | GCA_002102435.1  | 93%              | 850721     | 122019       |
| Cetartiodactyla | <i>Tragulus javanicus</i>             | 885                      | 875            | 1760  | 24                    | GCA_004024965.1  | 96%              | 78495      | 86670        |
| Cetartiodactyla | <i>Bubalus bubalis</i>                | 751                      | 1030           | 1781  | -                     | GCF_000471725.1  | 96%              | 1412388    | 21938        |
| Cetartiodactyla | <i>Sus scrofa</i>                     | 997                      | 900            | 1897  | 54                    | GCF_000003025.5  | 96%              | 576008     | 69480        |
| Cetartiodactyla | <i>Rangifer tarandus tarandus</i>     | 765                      | 1134           | 1899  | 42                    | GCA_004026565.1  | 82%              | 77671      | 89062        |
| Cetartiodactyla | <i>Bos taurus</i>                     | 914                      | 1123           | 2037  | 46                    | GCF_000003205.7  | 96%              | 6806220    | 276285       |
| Cetartiodactyla | <i>Bos mutus</i>                      | 783                      | 1270           | 2053  | -                     | GCF_000298355.1  | 94%              | 1407960    | 22822        |
| Cetartiodactyla | <i>Elaphurus davidianus</i>           | 953                      | 1142           | 2095  | -                     | GCA_002443075.1  | 95%              | 59950      | 2844142      |
| Cetartiodactyla | <i>Bison bison bison</i>              | 836                      | 1333           | 2169  | -                     | GCF_000754665.1  | 90%              | 19971      | 7192658      |
| Cetartiodactyla | <i>Hippopotamus amphibius</i>         | 994                      | 1196           | 2190  | -                     | GCA_004027065.1  | 96%              | 74418      | 86527        |
| Carnivora       | <i>Leptonychotes weddellii</i>        | 269                      | 418            | 687   | -                     | GCF_000349705.1  | 80%              | 23664      | 904031       |
| Carnivora       | <i>Mirounga angustirostris</i>        | 255                      | 438            | 693   | -                     | GCA_004023865.1  | 94%              | 52833      | 64640        |
| Carnivora       | <i>Neomonachus schauinslandi</i>      | 269                      | 432            | 701   | -                     | GCF_0002201575.1 | 95%              | 112698     | 29518589     |
| Carnivora       | <i>Odobenus rosmarus divergens</i>    | 389                      | 457            | 846   | -                     | GCF_000321225.1  | 96%              | 89951      | 2616778      |
| Carnivora       | <i>Zalophus californianus</i>         | 323                      | 537            | 860   | -                     | GCA_004024565.1  | 96%              | 90567      | 132377       |
| Carnivora       | <i>Lycyaon pictus</i>                 | 537                      | 425            | 962   | -                     | GCA_001887905.1  | 85%              | 5555       | 63240551     |
| Carnivora       | <i>Puma concolor</i>                  | 583                      | 445            | 1028  | -                     | GCF_003327715.1  | 84%              | 27187      | 100532876    |
| Carnivora       | <i>Felis nigripes</i>                 | 517                      | 514            | 1031  | -                     | GCA_004023925.1  | 41%              | 16007      | 18631        |
| Carnivora       | <i>Panthera tigris altaica</i>        | 636                      | 443            | 1079  | -                     | GCF_000464555.1  | 86%              | 30032      | 8860407      |
| Carnivora       | <i>Vulpes lagopus</i>                 | 571                      | 513            | 1084  | -                     | GCA_004023825.1  | 83%              | 73976      | 102053       |
| Carnivora       | <i>Acinonyx jubatus</i>               | 580                      | 514            | 1094  | 18                    | GCA_004027535.1  | 96%              | 42476      | 65411        |
| Carnivora       | <i>Canis lupus familiaris</i>         | 581                      | 517            | 1098  | 27                    | GCF_000002285.3  | 96%              | 45876610   | 267478       |
| Carnivora       | <i>Pteronura brasiliensis</i>         | 516                      | 639            | 1155  | -                     | GCA_004024605.1  | 84%              | 90879      | 119023       |
| Carnivora       | <i>Ailurus fulgens</i>                | 686                      | 476            | 1162  | -                     | GCA_002007465.1  | 95%              | 99577      | 2983736      |
| Carnivora       | <i>Enhydra lutris kenyoni</i>         | 518                      | 647            | 1165  | -                     | GCF_002288905.1  | 91%              | 244529     | 38751465     |
| Carnivora       | <i>Hyaena hyaena</i>                  | 562                      | 604            | 1166  | -                     | GCA_004023945.1  | 96%              | 51677      | 66490        |
| Carnivora       | <i>Panthera onca</i>                  | 599                      | 576            | 1175  | -                     | GCA_004023805.1  | 80%              | 62836      | 116574       |
| Carnivora       | <i>Felis catus</i>                    | 683                      | 503            | 1186  | 18                    | GCF_000181335.2  | 96%              | 18072971   | 45189        |
| Carnivora       | <i>Panthera pardus</i>                | 691                      | 527            | 1218  | -                     | GCA_001857705.1  | 96%              | 21701857   | 20993        |
| Carnivora       | <i>Cryptoprocta ferox</i>             | 638                      | 598            | 1236  | -                     | GCA_004023885.1  | 95%              | 128639     | 173473       |
| Carnivora       | <i>Mustela putorius furo</i>          | 707                      | 625            | 1332  | 22                    | GCF_000239315.1  | 89%              | 9567452    | 66755        |
| Carnivora       | <i>Mellivora capensis</i>             | 663                      | 732            | 1395  | -                     | GCA_004024625.1  | 81%              | 50213      | 59143        |
| Carnivora       | <i>Spilogale gracilis</i>             | 700                      | 751            | 1451  | -                     | GCA_004023965.1  | 78%              | 63054      | 85970        |
| Carnivora       | <i>Suricata suricatta</i>             | 707                      | 834            | 1541  | -                     | GCA_004023905.1  | 87%              | 148487     | 186735       |
| Carnivora       | <i>Helogale parvula</i>               | 875                      | 676            | 1551  | -                     | GCA_004023845.1  | 84%              | 113567     | 179119       |
| Carnivora       | <i>Paradoxurus hermaphroditus</i>     | 831                      | 735            | 1566  | 22                    | GCA_004024585.1  | 74%              | 62870      | 71823        |
| Carnivora       | <i>Ailuropoda melanoleuca</i>         | 655                      | 958            | 1613  | -                     | GCF_002007445.1  | 95%              | 127363     | 129245720    |
| Carnivora       | <i>Ursus maritimus</i>                | 869                      | 757            | 1626  | -                     | GCF_000687225.1  | 88%              | 46506      | 15940661     |
| Carnivora       | <i>Mungos mungo</i>                   | 860                      | 784            | 1644  | 20                    | GCA_004023785.1  | 96%              | 180702     | 236501       |
| Cetartiodactyla | <i>Orcinus orca</i>                   | 24                       | 130            | 154   | 0                     | GCF_000331955.2  | 95%              | 12735091   | 70300        |
| Cetartiodactyla | <i>Phocoena phocoena</i>              | 25                       | 131            | 156   | 0                     | GCA_004363495.1  | 83%              | 89111      | 115969       |
| Cetartiodactyla | <i>Monodon monoceros</i>              | 28                       | 135            | 163   | 0                     | GCA_004026685.1  | 95%              | 67024      | 86766        |
| Cetartiodactyla | <i>Neophocaena asiaeorientalis</i>    |                          |                |       |                       |                  |                  |            |              |
| Cetartiodactyla | <i>Neophocaena asiaeorientalis</i>    | 27                       | 138            | 165   | 0                     | GCA_003031525.1  | 94%              | 6341296    | 86003        |
| Cetartiodactyla | <i>Pontoporia blainvillei</i>         | 18                       | 149            | 167   | -                     | GCA_004363935.1  | 30%              | 2541       | 2541         |

| Order           | Species                                     | olfactory receptor genes |                |       | # Olfactory Turbinals | assembly        | BUSCO % complete | contig N50 | scaffold N50 |
|-----------------|---------------------------------------------|--------------------------|----------------|-------|-----------------------|-----------------|------------------|------------|--------------|
|                 |                                             | functional               | non-functional | total |                       |                 |                  |            |              |
| Cetartiodactyla | <i>Inia geoffrensis</i>                     | 28                       | 142            | 170   | 0                     | GCA_004363515.1 | 68%              | 24570      | 26707        |
| Cetartiodactyla | <i>Tursiops truncatus</i>                   | 19                       | 151            | 170   | 0                     | GCA_001922835.1 | 76%              | 44299      | 2655543      |
| Cetartiodactyla | <i>Kogia breviceps</i>                      | 18                       | 166            | 184   | 0                     | GCA_004363705.1 | 65%              | 26201      | 28812        |
| Cetartiodactyla | <i>Delphinapterus leucas</i>                | 32                       | 155            | 187   | 0                     | GCF_002288925.1 | 95%              | 19885328   | 159142       |
| Cetartiodactyla | <i>Platanista minor</i>                     | 29                       | 185            | 214   | -                     | GCA_004363435.1 | 50%              | 20879      | 23933        |
| Cetartiodactyla | <i>Lipotes vexillifer</i>                   | 20                       | 203            | 223   | 0                     | GCF_000442215.1 | 95%              | 31902      | 2419148      |
| Cetartiodactyla | <i>Mesoplodon bidens</i>                    | 32                       | 192            | 224   | 0                     | GCA_004027085.1 | 69%              | 28959      | 33532        |
| Cetartiodactyla | <i>Ziphius cavirostris</i>                  | 42                       | 255            | 297   | 0                     | GCA_004364475.1 | 41%              | 3606       | 3608         |
| Cetartiodactyla | <i>Balaenoptera acutorostrata scammoni</i>  | 93                       | 221            | 314   | 11                    | GCF_000493695.1 | 94%              | 22690      | 12843668     |
| Cetartiodactyla | <i>Balaenoptera bonaerensis</i>             | 71                       | 245            | 316   | -                     | GCA_000978805.1 | 53%              | 8410       | 20082        |
| Cetartiodactyla | <i>Eschrichtius robustus</i>                | 91                       | 243            | 334   | -                     | GCA_004363415.1 | 80%              | 68559      | 94414        |
| Cetartiodactyla | <i>Eubalaena japonica</i>                   | 109                      | 283            | 392   | -                     | GCA_004363455.1 | 72%              | 34866      | 39813        |
| Chiroptera      | <i>Craseonycteris thonglongyai</i>          | 139                      | 193            | 332   | -                     | GCA_004027555.1 | 67%              | 23218      | 25762        |
| Chiroptera      | <i>Miniopterus natalensis</i>               | 287                      | 221            | 508   | -                     | GCF_001595765.1 | 94%              | 29777      | 4315193      |
| Chiroptera      | <i>Rhinolophus sinicus</i>                  | 236                      | 279            | 515   | -                     | GCA_001888835.1 | 96%              | 37803      | 3754400      |
| Chiroptera      | <i>Pteronotus parnellii</i>                 | 239                      | 277            | 516   | -                     | GCA_000465405.1 | 47%              | 9502       | 22675        |
| Chiroptera      | <i>Rhinolophus ferrumequinum</i>            | 245                      | 274            | 519   | -                     | GCA_007922735.1 | 96%              | 127195     | 156956       |
| Chiroptera      | <i>Hipposideros armiger</i>                 | 288                      | 250            | 538   | -                     | GCA_001890085.1 | 90%              | 39863      | 2328177      |
| Chiroptera      | <i>Miniopterus schreibersii</i>             | 265                      | 304            | 569   | -                     | GCA_004026525.1 | 85%              | 82539      | 108707       |
| Chiroptera      | <i>Mormoops blainvilliei</i>                | 252                      | 337            | 589   | -                     | GCA_004026545.1 | 86%              | 142682     | 156292       |
| Chiroptera      | <i>Noctilio leporinus</i>                   | 342                      | 260            | 602   | -                     | GCA_004026585.1 | 87%              | 135651     | 191494       |
| Chiroptera      | <i>Eptesicus fuscus</i>                     | 361                      | 245            | 606   | -                     | GCF_000308155.1 | 94%              | 21392      | 13454942     |
| Chiroptera      | <i>Megaderma lyra</i>                       | 264                      | 349            | 613   | 28                    | GCA_004026885.1 | 88%              | 71674      | 96489        |
| Chiroptera      | <i>Macrotus californicus</i>                | 323                      | 301            | 624   | -                     | GCA_007922815.1 | 70%              | 16386      | 16925        |
| Chiroptera      | <i>Hipposideros galeritus</i>               | 256                      | 402            | 658   | -                     | GCA_004027415.1 | 72%              | 33704      | 37985        |
| Chiroptera      | <i>Eidolon helvum</i>                       | 278                      | 387            | 665   | -                     | GCA_000465285.1 | 72%              | 27684      | 12668        |
| Chiroptera      | <i>Myotis davidii</i>                       | 319                      | 359            | 678   | -                     | GCF_000327345.1 | 87%              | 15182      | 3454484      |
| Chiroptera      | <i>Myotis brandtii</i>                      | 411                      | 274            | 685   | -                     | GCF_000412655.1 | 89%              | 23289      | 3225832      |
| Chiroptera      | <i>Nycticeius humeralis</i>                 | 374                      | 334            | 708   | -                     | GCA_007922795.1 | 54%              | 14267      | 15095        |
| Chiroptera      | <i>Desmodus rotundus</i>                    | 363                      | 354            | 717   | -                     | GCA_002940915.2 | 93%              | 26869735   | 80250        |
| Chiroptera      | <i>Myotis lucifugus</i>                     | 463                      | 269            | 732   | 10                    | GCF_000147115.1 | 87%              | 64330      | 4293315      |
| Chiroptera      | <i>Pipistrellus pipistrellus</i>            | 391                      | 351            | 742   | -                     | GCA_004026625.1 | 64%              | 26707      | 33992        |
| Chiroptera      | <i>Anoura caudifer</i>                      | 383                      | 367            | 750   | -                     | GCA_004027475.1 | 88%              | 143417     | 185021       |
| Chiroptera      | <i>Myotis myotis</i>                        | 427                      | 323            | 750   | -                     | GCA_004026985.1 | 96%              | 19322      | 21824        |
| Chiroptera      | <i>Tadarida brasiliensis</i>                | 338                      | 418            | 756   | -                     | GCA_004025005.1 | 67%              | 22617      | 24311        |
| Chiroptera      | <i>Lasiurus borealis</i>                    | 412                      | 355            | 767   | -                     | GCA_004026805.1 | 68%              | 35165      | 38543        |
| Chiroptera      | <i>Antrozous pallidus</i>                   | 416                      | 362            | 778   | -                     | GCA_007922775.1 | 50%              | 13442      | 13958        |
| Chiroptera      | <i>Murina aurata feae</i>                   | 442                      | 423            | 865   | -                     | GCA_004026665.1 | 64%              | 23400      | 26051        |
| Chiroptera      | <i>Pteropus alecto</i>                      | 373                      | 499            | 872   | -                     | GCF_000325575.1 | 95%              | 31841      | 15954802     |
| Chiroptera      | <i>Artibeus jamaicensis</i>                 | 459                      | 449            | 908   | 12                    | GCA_004027435.1 | 70%              | 32365      | 35347        |
| Chiroptera      | <i>Macroglossus sobrinus</i>                | 391                      | 526            | 917   | -                     | GCA_004027375.1 | 91%              | 338389     | 453401       |
| Chiroptera      | <i>Micronycteris hirsuta</i>                | 479                      | 460            | 939   | -                     | GCA_004026765.1 | 77%              | 62961      | 68868        |
| Chiroptera      | <i>Tonatia saurophila</i>                   | 473                      | 527            | 1000  | -                     | GCA_004024845.1 | 86%              | 141649     | 165561       |
| Chiroptera      | <i>Rousettus aegyptiacus</i>                | 488                      | 531            | 1019  | -                     | GCA_004024865.1 | 96%              | 100260     | 125332       |
| Chiroptera      | <i>Pteropus vampyrus</i>                    | 476                      | 589            | 1065  | -                     | GCF_000151845.1 | 90%              | 21866      | 5954017      |
| Chiroptera      | <i>Carollia perspicillata</i>               | 490                      | 847            | 1337  | -                     | GCA_004027735.1 | 48%              | 10341      | 10739        |
| Dermoptera      | <i>Galeopterus variegatus</i>               | 831                      | 982            | 1813  | -                     | GCA_004027255.1 | 95%              | 33956      | 37578        |
| Lagomorpha      | <i>Ochotona princeps</i>                    | 477                      | 373            | 850   | 12                    | GCF_000292845.1 | 92%              | 42347      | 26863993     |
| Lagomorpha      | <i>Lepus americanus</i>                     | 527                      | 440            | 967   | 20                    | GCA_004026855.1 | 53%              | 15057      | 16725        |
| Lagomorpha      | <i>Oryctolagus cuniculus cuniculus</i>      | 639                      | 405            | 1044  | 16                    | GCF_000003625.3 | 89%              | 35972871   | 64648        |
| Eulipotyphla    | <i>Condylura cristata</i>                   | 570                      | 390            | 960   | -                     | GCF_000260355.1 | 89%              | 46163      | 55520359     |
| Eulipotyphla    | <i>Erinaceus europaeus</i>                  | 814                      | 453            | 1267  | 14                    | GCF_000296755.1 | 94%              | 21359      | 3264618      |
| Eulipotyphla    | <i>Crocodyra indochinensis</i>              | 774                      | 685            | 1459  | -                     | GCA_004027635.1 | 21%              | 4927       | 4929         |
| Eulipotyphla    | <i>Uropsilus gracilis</i>                   | 809                      | 691            | 1500  | -                     | GCA_004024945.1 | 63%              | 43618      | 55035        |
| Eulipotyphla    | <i>Sorex araneus</i>                        | 1048                     | 613            | 1661  | 14                    | GCF_000181275.1 | 92%              | 22623      | 22794405     |
| Eulipotyphla    | <i>Scalopus aquaticus</i>                   | 978                      | 867            | 1845  | -                     | GCA_004024925.1 | 83%              | 72421      | 94879        |
| Eulipotyphla    | <i>Solenodon paradoxus</i>                  | 821                      | 1209           | 2030  | -                     | GCA_004363575.1 | 91%              | 236847     | 407682       |
| Perissodactyla  | <i>Ceratotherium simum cottoni</i>          | 746                      | 986            | 1732  | -                     | GCA_004027795.1 | 55%              | 21199      | 23005        |
| Perissodactyla  | <i>Ceratotherium simum simum</i>            | 908                      | 1013           | 1921  | -                     | GCF_000283155.1 | 96%              | 92960      | 26277727     |
| Perissodactyla  | <i>Equus przewalskii</i>                    | 761                      | 1307           | 2068  | -                     | GCF_000696695.1 | 87%              | 57610      | 513800       |
| Perissodactyla  | <i>Tapirus terrestris</i>                   | 880                      | 1271           | 2151  | -                     | GCA_004025025.1 | 84%              | 164193     | 186384       |
| Perissodactyla  | <i>Equus asinus asinus</i>                  | 898                      | 1281           | 2179  | -                     | GCF_001305755.1 | 95%              | 66737      | 3776412      |
| Perissodactyla  | <i>Tapirus indicus</i>                      | 936                      | 1338           | 2274  | -                     | GCA_004024905.1 | 87%              | 225792     | 308930       |
| Perissodactyla  | <i>Diceros bicornis</i>                     | 992                      | 1337           | 2329  | -                     | GCA_004027315.1 | 85%              | 87375      | 115504       |
| Perissodactyla  | <i>Equus caballus</i>                       | 931                      | 1594           | 2525  | 74                    | GCF_000002305.2 | 96%              | 112381     | 46749900     |
| Perissodactyla  | <i>Dicerorhinus sumatrensis sumatrensis</i> | 1180                     | 1858           | 3038  | -                     | GCA_002844835.1 | 97%              | 89455      | 614498       |
| Pholidota       | <i>Manis pentadactyla</i>                   | 571                      | 1129           | 1700  | -                     | GCA_000738955.1 | 71%              | 28718      | 117920       |
| Pholidota       | <i>Manis javanica</i>                       | 478                      | 1416           | 1894  | -                     | GCF_001685135.1 | 85%              | 38922      | 204728       |
| Pholidota       | <i>Manis tricuspis</i>                      | 703                      | 1386           | 2089  | -                     | GCA_004765945.1 | 67%              | 23755      | 25241        |
| Primates        | <i>Colobus angolensis palliatus</i>         | 177                      | 275            | 452   | -                     | GCF_000951035.1 | 93%              | 38363      | 7840981      |
| Primates        | <i>Ptilocolobus tephrosceles</i>            | 202                      | 254            | 456   | -                     | GCA_002776525.1 | 94%              | 98446      | 131283114    |
| Primates        | <i>Saimiri boliviensis boliviensis</i>      | 265                      | 218            | 483   | -                     | GCF_000235385.1 | 94%              | 38823      | 18744880     |
| Primates        | <i>Pygathrix nemaeus</i>                    | 191                      | 312            | 503   | -                     | GCA_004024825.1 | 75%              | 51434      | 68569        |

| Order     | Species                                   | olfactory receptor genes |                |       | # Olfactory Turbinals | assembly         | BUSCO % complete | contig N50 | scaffold N50 |
|-----------|-------------------------------------------|--------------------------|----------------|-------|-----------------------|------------------|------------------|------------|--------------|
|           |                                           | functional               | non-functional | total |                       |                  |                  |            |              |
| Primates  | <i>Rhinopithecus roxellana</i>            | 202                      | 306            | 508   | -                     | GCF_000769185.1  | 96%              | 1549224    | 77151        |
| Primates  | <i>Semnopithecus entellus</i>             | 184                      | 332            | 516   | 4                     | GCA_004025065.1  | 58%              | 25064      | 29955        |
| Primates  | <i>Nasalis larvatus</i>                   | 197                      | 339            | 536   | -                     | GCA_004027105.1  | 59%              | 34532      | 44943        |
| Primates  | <i>Rhinopithecus bieti</i>                | 187                      | 355            | 542   | -                     | GCF_001698545.1  | 92%              | 36417      | 2225337      |
| Primates  | <i>Nomascus leucogenys</i>                | 217                      | 328            | 545   | -                     | GCF_000146795.2  | 96%              | 52956880   | 35148        |
| Primates  | <i>Cercopithecus neglectus</i>            | 262                      | 309            | 571   | -                     | GCA_004027615.1  | 50%              | 9789       | 10270        |
| Primates  | <i>Alouatta palliata</i>                  | 281                      | 320            | 601   | -                     | GCA_004027835.1  | 74%              | 51304      | 72427        |
| Primates  | <i>Ateles geoffroyi</i>                   | 299                      | 311            | 610   | -                     | GCA_004024785.1  | 74%              | 59033      | 73111        |
| Primates  | <i>Aotus nancymae</i>                     | 340                      | 282            | 622   | -                     | GCA_000952055.2  | 96%              | 8268663    | 126456       |
| Primates  | <i>Plectrocebus donacophilus</i>          | 250                      | 377            | 627   | -                     | GCA_004027715.1  | 61%              | 41149      | 46445        |
| Primates  | <i>Chlorocebus sabaues</i>                | 267                      | 366            | 633   | -                     | GCF_000409795.2  | 95%              | 90449      | 81825804     |
| Primates  | <i>Callithrix jacchus</i>                 | 325                      | 308            | 633   | 6                     | GCA_002754865.1  | 96%              | 155284     | 129239660    |
| Primates  | <i>Pithecia pithecia</i>                  | 259                      | 380            | 639   | -                     | GCA_004026645.1  | 78%              | 63292      | 83104        |
| Primates  | <i>Saguinus imperator</i>                 | 318                      | 325            | 643   | -                     | GCA_004024885.1  | 80%              | 53787      | 65636        |
| Primates  | <i>Macaca mulatta</i>                     | 316                      | 339            | 655   | -                     | GCF_000772875.2  | 96%              | 4193270    | 107172       |
| Primates  | <i>Macaca fascicularis</i>                | 326                      | 332            | 658   | 4                     | GCF_000364345.1  | 95%              | 88649475   | 86040        |
| Primates  | <i>Erythrocebus patas</i>                 | 294                      | 373            | 667   | -                     | GCA_004027335.1  | 65%              | 28523      | 34535        |
| Primates  | <i>Papio anubis</i>                       | 308                      | 363            | 671   | 8                     | GCA_000264685.2  | 94%              | 585721     | 149817       |
| Primates  | <i>Cebus capucinus imitator</i>           | 348                      | 324            | 672   | -                     | GCF_001604975.1  | 95%              | 41196      | 5274112      |
| Primates  | <i>Cercocebus atys</i>                    | 326                      | 352            | 678   | -                     | GCF_000955945.1  | 95%              | 112942     | 12849131     |
| Primates  | <i>Macaca nemestrina</i>                  | 312                      | 372            | 684   | -                     | GCF_000956065.1  | 95%              | 106897     | 15219753     |
| Primates  | <i>Pongo abelii</i>                       | 289                      | 396            | 685   | -                     | GCA_002880775.3  | 96%              | 98475126   | 11074009     |
| Primates  | <i>Cebus albifrons</i>                    | 338                      | 352            | 690   | -                     | GCA_004027755.1  | 59%              | 25652      | 31156        |
| Primates  | <i>Mandrillus leucophaeus</i>             | 351                      | 347            | 698   | -                     | GCF_000951045.1  | 92%              | 31346      | 3186748      |
| Primates  | <i>Gorilla gorilla gorilla</i>            | 303                      | 437            | 740   | -                     | GCA_900006655.3  | 93%              | 20634945   | 9406846      |
| Primates  | <i>Pan paniscus</i>                       | 318                      | 436            | 754   | -                     | GCF_000258655.2  | 95%              | 8197324    | 66676        |
| Primates  | <i>Pan troglodytes</i>                    | 360                      | 400            | 760   | -                     | GCA_002880755.3  | 96%              | 53103722   | 12421315     |
| Primates  | <i>Homo sapiens</i>                       | 372                      | 448            | 820   | 8                     | GCA_000001405.27 | 100%             | 59364414   | 56413054     |
| Primates  | <i>Propithecus coquereli</i>              | 519                      | 381            | 900   | 12                    | GCF_000956105.1  | 91%              | 28129      | 5604909      |
| Primates  | <i>Indri indri</i>                        | 458                      | 468            | 926   | -                     | GCA_004363605.1  | 67%              | 26447      | 28620        |
| Primates  | <i>Eulemur flavifrons</i>                 | 513                      | 413            | 926   | -                     | GCA_001262665.1  | 92%              | 27331      | 413352       |
| Primates  | <i>Lemur catta</i>                        | 532                      | 451            | 983   | 20                    | GCA_004024665.1  | 88%              | 158439     | 215715       |
| Primates  | <i>Nycticebus coucang</i>                 | 519                      | 532            | 1051  | -                     | GCA_004027815.1  | 65%              | 17693      | 19724        |
| Primates  | <i>Otlemur garnettii</i>                  | 672                      | 387            | 1059  | 12                    | GCF_000181295.1  | 96%              | 27100      | 13852661     |
| Primates  | <i>Microcebus murinus</i>                 | 670                      | 468            | 1138  | 14                    | GCA_000165445.3  | 96%              | 108171978  | 210702       |
| Primates  | <i>Mirza coquereli</i>                    | 619                      | 540            | 1159  | -                     | GCA_004024645.1  | 71%              | 60596      | 79947        |
| Primates  | <i>Cheirogaleus medius</i>                | 621                      | 572            | 1193  | 12                    | GCA_004024725.1  | 88%              | 90923      | 118572       |
| Primates  | <i>Eulemur fulvus</i>                     | 618                      | 581            | 1199  | -                     | GCA_004027275.1  | 60%              | 21310      | 22561        |
| Primates  | <i>Daubentonia madagascariensis</i>       | 700                      | 769            | 1469  | 27                    | GCA_004027145.1  | 92%              | 298834     | 379919       |
| Carnivora | <i>Cricetulus griseus</i>                 | 851                      | 517            | 1368  | -                     | GCA_900186095.1  | 97%              | 62039716   | 97133        |
| Rodentia  | <i>Ctenodactylus gundi</i>                | 306                      | 368            | 674   | -                     | GCA_004027205.1  | 92%              | 218543     | 354548       |
| Rodentia  | <i>Jaculus jaculus</i>                    | 421                      | 338            | 759   | -                     | GCF_000280705.1  | 93%              | 15675      | 22080993     |
| Rodentia  | <i>Allactaga bullata</i>                  | 462                      | 408            | 870   | -                     | GCA_004027895.1  | 61%              | 30651      | 36308        |
| Rodentia  | <i>Thryonomys swinderianus</i>            | 523                      | 421            | 944   | -                     | GCA_004025085.1  | 60%              | 18955      | 21523        |
| Rodentia  | <i>Psamomys obesus</i>                    | 507                      | 465            | 972   | -                     | GCA_002215935.1  | 96%              | 76398      |              |
| Rodentia  | <i>Petromys typicus</i>                   | 517                      | 487            | 1004  | -                     | GCA_004026965.1  | 68%              | 29916      | 35766        |
| Rodentia  | <i>Ellobius talpinus</i>                  | 417                      | 590            | 1007  | -                     | GCA_001685095.1  | 54%              | 8259       | 15246        |
| Rodentia  | <i>Ellobius lutescens</i>                 | 426                      | 607            | 1033  | -                     | GCA_001685075.1  | 84%              | 11648      | 242123       |
| Rodentia  | <i>Meriones unguiculatus</i>              | 552                      | 487            | 1039  | -                     | GCA_004026785.1  | 91%              | 69839      | 100883       |
| Rodentia  | <i>Muscardinus avellanarius</i>           | 598                      | 456            | 1054  | -                     | GCA_004027005.1  | 73%              | 44294      | 59013        |
| Rodentia  | <i>Ctenomys sociabilis</i>                | 527                      | 530            | 1057  | -                     | GCA_004027165.1  | 75%              | 37562      | 49073        |
| Rodentia  | <i>Chinchilla lanigera</i>                | 625                      | 465            | 1090  | -                     | GCF_000276665.1  | 95%              | 61105      | 21893125     |
| Rodentia  | <i>Myocastor coypus</i>                   | 580                      | 516            | 1096  | 10                    | GCA_004027025.1  | 66%              | 28446      | 35982        |
| Rodentia  | <i>Octodon degus</i>                      | 613                      | 490            | 1103  | -                     | GCF_000260255.1  | 95%              | 19847      | 12091372     |
| Rodentia  | <i>Pedetes capensis</i>                   | 585                      | 536            | 1121  | -                     | GCA_007922755.1  | 80%              | 54009      | 74432        |
| Rodentia  | <i>Rhizomys pruinosus</i>                 | 614                      | 523            | 1137  | -                     | GCA_004026225.1  | 94%              | 2627       | 2627         |
| Rodentia  | <i>Mesocricetus auratus</i>               | 647                      | 546            | 1193  | 14                    | GCF_000349665.1  | 86%              | 22511      | 12753307     |
| Rodentia  | <i>Perognathus longimembris pacificus</i> | 615                      | 579            | 1194  | -                     | GCA_004363475.1  | 66%              | 17686      | 24714        |
| Rodentia  | <i>Glis glis</i>                          | 694                      | 518            | 1212  | -                     | GCA_004027185.1  | 56%              | 26062      | 30338        |
| Rodentia  | <i>Acomys cahirinus</i>                   | 720                      | 492            | 1212  | -                     | GCA_004027535.1  | 73%              | 42476      | 65411        |
| Rodentia  | <i>Dipodomys ordii</i>                    | 707                      | 529            | 1236  | -                     | GCF_000151885.1  | 90%              | 48087      | 11931245     |
| Rodentia  | <i>Aplodontia rufa</i>                    | 620                      | 625            | 1245  | -                     | GCA_004027875.1  | 73%              | 33245      | 37811        |
| Rodentia  | <i>Onychomys torridus</i>                 | 654                      | 606            | 1260  | -                     | GCA_004026725.1  | 95%              | 18287      | 20878        |
| Rodentia  | <i>Ondatra zibethicus</i>                 | 628                      | 637            | 1265  | -                     | GCA_004026605.1  | 83%              | 73746      | 89093        |
| Rodentia  | <i>Dipodomys stephensi</i>                | 673                      | 604            | 1277  | -                     | GCA_004024685.1  | 68%              | 30710      | 36811        |
| Rodentia  | <i>Microtus ochrogaster</i>               | 779                      | 500            | 1279  | -                     | GCF_000317375.1  | 95%              | 21250      | 17270019     |
| Rodentia  | <i>Zapus hudsonius</i>                    | 695                      | 594            | 1289  | -                     | GCA_004024765.1  | 65%              | 23350      | 26350        |
| Rodentia  | <i>Graphiurus murinus</i>                 | 716                      | 603            | 1319  | -                     | GCA_004027655.1  | 58%              | 22138      | 28463        |
| Rodentia  | <i>Dolichotis patagonum</i>               | 509                      | 848            | 1357  | -                     | GCA_004027295.1  | 74%              | 27983      | 31026        |
| Rodentia  | <i>Peromyscus maniculatus bairdii</i>     | 865                      | 507            | 1372  | 14                    | GCF_000500345.1  | 96%              | 3760915    | 36367        |
| Rodentia  | <i>Xerus inauris</i>                      | 632                      | 742            | 1374  | -                     | GCA_004024805.1  | 78%              | 64054      | 83865        |
| Rodentia  | <i>Cavia aperea</i>                       | 556                      | 824            | 1380  | -                     | GCA_000688575.1  | 63%              | 1039       | 27928671     |
| Rodentia  | <i>Hystrix cristata</i>                   | 684                      | 714            | 1398  | 22                    | GCA_004026905.1  | 80%              | 57102      | 64768        |
| Rodentia  | <i>Mus spretus</i>                        | 874                      | 556            | 1430  | -                     | GCA_001624865.1  | 95%              | 17887      | 131945496    |

| Order     | Species                           | olfactory receptor genes |                |       | # Olfactory Turbinals | assembly         | BUSCO % complete | contig N50 | scaffold N50 |
|-----------|-----------------------------------|--------------------------|----------------|-------|-----------------------|------------------|------------------|------------|--------------|
|           |                                   | functional               | non-functional | total |                       |                  |                  |            |              |
| Rodentia  | <i>Mus pahari</i>                 | 942                      | 536            | 1478  | -                     | GCA_900095145.2  | 96%              | 111406228  | 29465        |
| Rodentia  | <i>Mus musculus</i>               | 964                      | 523            | 1487  | 12                    | GCF_000001635.26 | 97%              | 52589046   | 32273079     |
| Rodentia  | <i>Sigmodon hispidus</i>          | 841                      | 653            | 1494  | 14                    | GCA_004025045.1  | 86%              | 67983      | 101373       |
| Rodentia  | <i>Mus caroli</i>                 | 993                      | 524            | 1517  | -                     | GCA_900094665.2  | 96%              | 122627250  | 30917        |
| Rodentia  | <i>Dinomys branickii</i>          | 734                      | 862            | 1596  | -                     | GCA_004027595.1  | 81%              | 64805      | 77918        |
| Rodentia  | <i>Ictidomys tridecemlineatus</i> | 859                      | 833            | 1692  | -                     | GCF_000236235.1  | 94%              | 44137      | 8192786      |
| Rodentia  | <i>Cricetomys gambianus</i>       | 829                      | 867            | 1696  | -                     | GCA_004027575.1  | 83%              | 80761      | 110049       |
| Rodentia  | <i>Marmota marmota marmota</i>    | 873                      | 826            | 1699  | 10                    | GCF_001458135.1  | 95%              | 66492      | 31340621     |
| Rodentia  | <i>Rattus norvegicus</i>          | 1073                     | 679            | 1752  | 12                    | GCF_000001895.5  | 95%              | 100461     | 14986627     |
| Rodentia  | <i>Cuniculus paca</i>             | 752                      | 1025           | 1777  | 18                    | GCA_004365215.1  | 94%              | 3890       | 3892         |
| Rodentia  | <i>Spermophilus dauricus</i>      | 864                      | 1009           | 1873  | -                     | GCA_002406435.1  | 91%              | 34849      | 1761345      |
| Rodentia  | <i>Cavia tschudii</i>             | 666                      | 1215           | 1881  | -                     | GCA_004027695.1  | 85%              | 64807      | 91436        |
| Rodentia  | <i>Capromys pilorides</i>         | 952                      | 951            | 1903  | -                     | GCA_004027915.1  | 34%              | 4080       | 4081         |
| Rodentia  | <i>Castor canadensis</i>          | 729                      | 1301           | 2030  | -                     | GCA_004027675.1  | 91%              | 49369      | 55723        |
| Rodentia  | <i>Cavia porcellus</i>            | 703                      | 1335           | 2038  | 18                    | GCF_000151735.1  | 93%              | 80583      | 27942054     |
| Rodentia  | <i>Fukomys damarensis</i>         | 960                      | 1113           | 2073  | -                     | GCF_000743615.1  | 91%              | 5314287    | 44830        |
| Rodentia  | <i>Hydrochoerus hydrochaeris</i>  | 685                      | 1566           | 2251  | 12                    | GCA_004027455.1  | 88%              | 148451     | 202224       |
| Rodentia  | <i>Nannospalax galili</i>         | 994                      | 1273           | 2267  | -                     | GCF_000622305.1  | 95%              | 30353      | 3618479      |
| Rodentia  | <i>Heterocephalus glaber</i>      | 820                      | 1700           | 2520  | -                     | GCF_000247695.1  | 95%              | 47778      | 20532749     |
| Rodentia  | <i>Dasyprocta punctata</i>        | 1429                     | 1804           | 3233  | -                     | GCA_004363535.1  | 71%              | 38650      | 43703        |
| Scandenta | <i>Tupaia tana</i>                | 874                      | 981            | 1855  | -                     | GCA_004365275.1  | 27%              | 2971       | 2973         |
| Scandenta | <i>Tupaia chinensis</i>           | 1053                     | 1168           | 2221  | 8                     | GCF_000334495.1  | 94%              | 25938      | 3670124      |
| Cingulata | <i>Chaetophractus vellerosus</i>  | 1114                     | 1694           | 2808  | -                     | GCA_004027955.1  | 15%              | 1606       | 1606         |
| Cingulata | <i>Tolypeutes matacus</i>         | 1034                     | 2095           | 3129  | -                     | GCA_004025125.1  | 28%              | 9441       | 10217        |
| Cingulata | <i>Dasyypus novemcinctus</i>      | 1390                     | 2646           | 4036  | -                     | GCF_000208655.1  | 88%              | 26277      | 1687935      |
| Pilosa    | <i>Bradypus variegatus</i>        | 115                      | 430            | 545   | -                     | GCA_004027775.1  | 21%              | 1900       | 1900         |
| Pilosa    | <i>Choloepus didactylus</i>       | 929                      | 1385           | 2314  | 32                    | GCA_004027855.1  | 41%              | 7167       | 7289         |
| Pilosa    | <i>Tamandua tetradactyla</i>      | 960                      | 1476           | 2436  | 26                    | GCA_004025105.1  | 62%              | 18654      | 19789        |
| Pilosa    | <i>Myrmecophaga tridactyla</i>    | 1229                     | 1940           | 3169  | 26                    | GCA_004026745.1  | 67%              | 36434      | 41255        |
| Pilosa    | <i>Choloepus hoffmanni</i>        | 1268                     | 2571           | 3839  | -                     | GCA_000164785.2  | 95%              | 366442     | 64490        |

**Table S12.**  
**Olfactory receptor gene and turbinal counts for 249 placental mammal species.**



| Gene         | region                   | Forward or Reverse | # Trait Loss Species | # Trait Preserving Species | Perfect Match Margin | GLS p    | p adjusted | total | significant |
|--------------|--------------------------|--------------------|----------------------|----------------------------|----------------------|----------|------------|-------|-------------|
| RPE65        | chr1:68444529-68444685   | r                  | 154                  | 22                         | -0.064               | 1.04E-08 | 0.00045    | 17    | 4           |
| DDOST        | chr1:20654221-20654374   | r                  | 153                  | 22                         | -0.058               | 1.11E-08 | 0.00045    | 12    | 2           |
| UBE2Q1       | chr1:154552088-154552185 | r                  | 148                  | 22                         | -0.092               | 2.75E-08 | 0.00088    | 12    | 1           |
| MEF2D        | chr1:156477006-156477219 | r                  | 140                  | 22                         | -0.093               | 5.75E-08 | 0.00154    | 18    | 1           |
| DHRS3        | chr1:12580521-12580677   | r                  | 153                  | 22                         | -0.076               | 1.44E-07 | 0.00314    | 12    | 2           |
| FUBP1        | chr1:77965066-77965238   | r                  | 153                  | 20                         | -0.069               | 1.78E-07 | 0.00314    | 26    | 1           |
| RPE65        | chr1:68429768-68429941   | r                  | 153                  | 22                         | -0.121               | 1.98E-07 | 0.00314    | 17    | 4           |
| PTP4A2       | chr1:31908411-31908972   | r                  | 146                  | 19                         | -0.126               | 2.06E-07 | 0.00314    | 20    | 1           |
| LARP4B       | chr10:830862-830987      | r                  | 153                  | 22                         | -0.048               | 2.34E-07 | 0.00314    | 23    | 1           |
| TXNIP        | chr1:145995139-145995305 | r                  | 150                  | 22                         | -0.096               | 2.54E-07 | 0.00314    | 12    | 2           |
| PINK1        | chr1:20639884-20639997   | f                  | 151                  | 22                         | -0.123               | 2.80E-07 | 0.00321    | 10    | 2           |
| TXNIP        | chr1:145994538-145994802 | r                  | 151                  | 22                         | -0.117               | 5.93E-07 | 0.00635    | 12    | 2           |
| DHRS3        | chr1:12568339-12568426   | r                  | 154                  | 22                         | -0.136               | 7.36E-07 | 0.00739    | 12    | 2           |
| MFN2         | chr1:12009590-12009731   | f                  | 152                  | 22                         | -0.085               | 1.01E-06 | 0.00954    | 24    | 2           |
| PINK1        | chr1:20648990-20649237   | f                  | 151                  | 21                         | -0.109               | 1.68E-06 | 0.01420    | 10    | 2           |
| PINK1_AS     | chr1:20648990-20649237   | r                  | 151                  | 21                         | -0.109               | 1.68E-06 | 0.01420    | 5     | 1           |
| RPE65        | chr1:68431278-68431404   | r                  | 150                  | 22                         | -0.118               | 1.77E-06 | 0.01422    | 17    | 4           |
| RPE65        | chr1:68440847-68441003   | r                  | 153                  | 22                         | -0.070               | 2.50E-06 | 0.01912    | 17    | 4           |
| NCDN         | chr1:35560304-35561301   | f                  | 148                  | 22                         | -0.048               | 6.28E-06 | 0.04459    | 13    | 1           |
| MFN2         | chr1:12004823-12004934   | f                  | 153                  | 22                         | -0.143               | 6.96E-06 | 0.04459    | 24    | 2           |
| CALML3       | chr10:5525085-5525535    | f                  | 102                  | 21                         | -0.060               | 7.20E-06 | 0.04459    | 2     | 1           |
| RP11_116G8.5 | chr10:5525085-5525535    | r                  | 102                  | 21                         | -0.060               | 7.20E-06 | 0.04459    | 1     | 1           |
| CACNA1E      | chr1:181785710-181785826 | f                  | 153                  | 21                         | -0.085               | 7.36E-06 | 0.04459    | 57    | 1           |
| DDOST        | chr1:20653619-20653777   | r                  | 153                  | 22                         | -0.101               | 7.72E-06 | 0.04459    | 12    | 2           |
| OVGP1        | chr1:111421272-111421463 | r                  | 145                  | 19                         | -0.292               | 7.84E-06 | 0.04459    | 7     | 1           |
| QSOX1        | chr1:180194211-180194405 | f                  | 148                  | 22                         | -0.200               | 8.05E-06 | 0.04459    | 14    | 1           |
| TMEM9        | chr1:201151756-201151864 | r                  | 151                  | 22                         | -0.211               | 8.52E-06 | 0.04498    | 6     | 1           |
| SHC1         | chr1:154965537-154965783 | r                  | 151                  | 22                         | -0.105               | 8.68E-06 | 0.04498    | 16    | 1           |

**Table S13.**  
**Regions associated with hibernation in GLS forward genomics analysis.**

| gene set   | description                                                                                   | genes in set | overlap | expected overlap | ratio | p        | FDR  | genes        |
|------------|-----------------------------------------------------------------------------------------------|--------------|---------|------------------|-------|----------|------|--------------|
| GO:1904923 | regulation of autophagy of mitochondrion in response to mitochondrial depolarization          | 13           | 2       | 0.01             | > 100 | 7.52E-05 | 0.39 | PINK1; MFN2  |
| GO:0098779 | positive regulation of mitophagy in response to mitochondrial depolarization                  | 8            | 2       | 0.01             | > 100 | 3.23E-05 | 0.51 | PINK1; MFN2  |
| GO:1904925 | positive regulation of autophagy of mitochondrion in response to mitochondrial depolarization | 12           | 2       | 0.01             | > 100 | 6.52E-05 | 0.51 | PINK1; MFN2  |
| GO:0098780 | response to mitochondrial depolarisation                                                      | 18           | 2       | 0.02             | > 100 | 1.36E-04 | 0.53 | PINK1; MFN2  |
| GO:1904707 | positive regulation of vascular associated smooth muscle cell proliferation                   | 33           | 2       | 0.03             | 69.32 | 4.22E-04 | 1.00 | MEF2D; MFN2  |
| GO:0016242 | negative regulation of macroautophagy                                                         | 35           | 2       | 0.03             | 65.36 | 4.71E-04 | 1.00 | PINK1; QSOX1 |
| GO:0042572 | retinol metabolic process                                                                     | 52           | 2       | 0.05             | 43.99 | 1.00E-03 | 1.00 | RPE65; DHRS3 |
| GO:1904705 | regulation of vascular associated smooth muscle cell proliferation                            | 55           | 2       | 0.05             | 41.59 | 1.12E-03 | 1.00 | MEF2D; MFN2  |
| GO:0008286 | insulin receptor signaling pathway                                                            | 60           | 2       | 0.05             | 38.13 | 1.32E-03 | 1.00 | RPE65; SHC1  |
| GO:0072655 | establishment of protein localization to mitochondrion                                        | 74           | 2       | 0.06             | 30.91 | 1.98E-03 | 1.00 | PINK1; MFN2  |

**Table S14.**

**Top ten GO Biological Process gene sets enriched for genes associated with hibernation in GLS forward genomics analysis.** Gene sets overlapping < 2 genes are excluded.

| direction in hibernators | gene set                                                                 | genes in set | overlap | expected overlap | ratio | p        | FDR   | genes                 |
|--------------------------|--------------------------------------------------------------------------|--------------|---------|------------------|-------|----------|-------|-----------------------|
| faster evolving          | GO:0006970: response to osmotic stress                                   | 76           | 2       | 0.0462           | 43.30 | 9.14E-04 | 0.583 | SCN2A; SLC12A5        |
| faster evolving          | GO:0045785: positive regulation of cell adhesion                         | 392          | 3       | 0.2382           | 12.59 | 0.0014   | 0.583 | DENND6A; HSPD1; CRK   |
| faster evolving          | GO:0009266: response to temperature stimulus                             | 201          | 2       | 0.1222           | 16.37 | 0.0062   | 0.983 | SLC12A5; HSPD1        |
| faster evolving          | GO:0016358: dendrite development                                         | 219          | 2       | 0.1331           | 15.03 | 0.0073   | 0.983 | SLC12A5; CRK          |
| faster evolving          | GO:0002449: lymphocyte mediated immunity                                 | 238          | 2       | 0.1446           | 13.83 | 0.0086   | 0.983 | HSPD1; CRK            |
| faster evolving          | GO:0002347: response to tumor cell                                       | 20           | 1       | 0.0122           | 82.27 | 0.0121   | 0.983 | HSPD1                 |
| faster evolving          | GO:0051131: chaperone-mediated protein complex assembly                  | 20           | 1       | 0.0122           | 82.27 | 0.0121   | 0.983 | HSPD1                 |
| faster evolving          | GO:0051271: negative regulation of cellular component movement           | 301          | 2       | 0.1829           | 10.93 | 0.0135   | 0.983 | ADAMTS9; CRK          |
| faster evolving          | GO:0040013: negative regulation of locomotion                            | 314          | 2       | 0.1908           | 10.48 | 0.0146   | 0.983 | ADAMTS9; CRK          |
| faster evolving          | GO:0046677: response to antibiotic                                       | 316          | 2       | 0.1920           | 10.41 | 0.0148   | 0.983 | HSPD1; CRK            |
| slower evolving          | GO:0044782: cilium organization                                          | 409          | 3       | 0.3038           | 9.87  | 0.0029   | 1.000 | CENPJ; CFAP410; ARMC9 |
| slower evolving          | GO:0009112: nucleobase metabolic process                                 | 36           | 1       | 0.0267           | 37.40 | 0.0264   | 1.000 | ALDH6A1               |
| slower evolving          | GO:0042769: DNA damage response, detection of DNA damage                 | 39           | 1       | 0.0290           | 34.52 | 0.0286   | 1.000 | CFAP410               |
| slower evolving          | GO:1901987: regulation of cell cycle phase transition                    | 386          | 2       | 0.2867           | 6.98  | 0.0319   | 1.000 | CENPJ; RIOK2          |
| slower evolving          | GO:1904951: positive regulation of establishment of protein localization | 437          | 2       | 0.3246           | 6.16  | 0.0401   | 1.000 | CENPJ; RIOK2          |
| slower evolving          | GO:0033627: cell adhesion mediated by integrin                           | 67           | 1       | 0.0498           | 20.09 | 0.0487   | 1.000 | ITGBL1                |
| slower evolving          | GO:0044772: mitotic cell cycle phase transition                          | 487          | 2       | 0.3617           | 5.53  | 0.0488   | 1.000 | CENPJ; RIOK2          |
| slower evolving          | GO:0030101: natural killer cell activation                               | 85           | 1       | 0.0631           | 15.84 | 0.0614   | 1.000 | ELF4                  |
| slower evolving          | GO:0072527: pyrimidine-containing compound metabolic process             | 99           | 1       | 0.0735           | 13.60 | 0.0712   | 1.000 | ALDH6A1               |
| slower evolving          | GO:0007229: integrin-mediated signaling pathway                          | 101          | 1       | 0.0750           | 13.33 | 0.0725   | 1.000 | ITGBL1                |

**Table S15.**  
**GO Biological Process gene sets enriched for genes evolving faster or slower in hibernators in RERconverge analysis.** We tested all significant genes against a non-redundant representative set of Gene Ontology Biological Processes using WebGestalt.

## Supplementary data files

### Data S1. (separate file)

Average phyloP scores for protein-coding genes.

### Data S2. (separate file)

**Input data for analysis of constraint in 100kb bins.** chr: Chromosome window is located on; start: start position of window; end: end position of window; zoonomiaBases: Number of bases within window with phyloP scores; zoonomiaConsBases: Number of bases within window with phyloP > 2.27 (5% FDR constraint positions); zoonomiaNspeciesLow: Number of bases within window with a low ( $\leq 24$ ) number of species aligning; zooN, A, C, G, T: Number of each base within window; zooFrac: Fraction of bases in window under constraint (phyloP > 2.27); k24gt90.sum: Number of bases with k24 > 0.9 (K24 UCSC track, a measure of mappability); cds.distinct.sum: Number of bases in CDS; cCRE.sum: Number of bases in cCREs; dhs.sum: Number of bases overlapping DHS.

### Data S3. (separate file)

**Hibernation RERConverge results.** Results include p-values, phylogenetic permutations p-values, and Bayes factor values to indicate whether a gene's relative evolutionary rate is associated with hibernation.
